# Supplementary material for: Integrated genome sizing (IGS) approach for the parallelization of whole genome analysis
Source: BMC Bioinformatics. 2018 Dec 3;19:462. doi: 10.1186/s12859-018-2499-1 (PMC6276166; doi:10.1186/s12859-018-2499-1)
Supplement: Supplementary file 4 — Table S4. List of Copy Number Variation in Disease Database (CNVD). (XLSX 1074 kb) [file 12859_2018_2499_MOESM4_ESM.xlsx]

## Sheet: Additonal file 4 
	List of Copy Number Variation in Disease Database (CNVD)
	Chr_N0_position	Ref	Alt	CNV type	Gene Symbol	Disease	Pubmed ID
	1 686795 688830	na	na	Copy number	LOC100288069	Autism	PM 22495311
	1 805353 805436	na	G	Deletion	FAM41C	Non syndromic sensorineural hearing loss	PM 21293372
	1 859228 860179	na	C	Deletion	LOC101928801	Non syndromic sensorineural hearing loss	PM 21293372
	1 936289 936341	na	na	Insertion	HES4	Non syndromic sensorineural hearing loss	PM 22037309
	1 953734 954344	na	G	Deletion	AGRN	Non syndromic sensorineural hearing loss	PM 21293372
	1 969553 969607	na	na	Insertion	AGRN	Non syndromic sensorineural hearing loss	PM 22037309
	1 971588 985903	na	na	Copy number	AGRN	Autism	PM 22495311
	1 978435 978486	na	G	Deletion	AGRN	Non syndromic sensorineural hearing loss	PM 21293372
	1 1076680 1076886	na	C	Deletion	LINC01342	Non syndromic sensorineural hearing loss	PM 21293372
	1 1132582 1133003	na	C	Deletion	TTLL10	Non syndromic sensorineural hearing loss	PM 21293372
	1 1138887 1142089	na	na	Gain	TNFRSF18	Williams beuren syndrome	PM 16971481
	1 1143932 1144001	na	na	Insertion	TNFRSF18	Non syndromic sensorineural hearing loss	PM 22037309
	1 1146705 1149548	na	na	Gain	TNFRSF4	Williams beuren syndrome	PM 16971481
	1 1149273 1149348	na	na	Insertion	TNFRSF4	Non syndromic sensorineural hearing loss	PM 22037309
	1 1152535 1152680	na	C	Deletion	SDF4	Non syndromic sensorineural hearing loss	PM 21293372
	1 1152535 1152709	na	C	Deletion	SDF4	Non syndromic sensorineural hearing loss	PM 21293372
	1 1189291 1209234	na	na	Gain	UBE2J2	Williams beuren syndrome	PM 16971481
	1 1194342 1194579	na	T	Deletion	UBE2J2	Non syndromic sensorineural hearing loss	PM 21293372
	1 1229896 1229955	na	na	Insertion	ACAP3	Non syndromic sensorineural hearing loss	PM 22037309
	1 1257363 1257416	na	na	Insertion	CPSF3L	Non syndromic sensorineural hearing loss	PM 22037309
	1 1293432 1293523	na	na	Insertion	MXRA8	Non syndromic sensorineural hearing loss	PM 22037309
	1 1455771 1456090	na	C	Deletion	ATAD3A	Non syndromic sensorineural hearing loss	PM 21293372
	1 1455774 1456093	na	G	Deletion	ATAD3A	Non syndromic sensorineural hearing loss	PM 21293372
	1 1486454 1486543	na	na	Insertion	SSU72	Non syndromic sensorineural hearing loss	PM 22037309
	1 1552426 1552526	na	na	Insertion	MIB2	Non syndromic sensorineural hearing loss	PM 22037309
	1 1590917 1590971	na	na	Gain	CDK11B	Autism	PM 21865298
	1 1610517 1610617	na	na	Insertion	SLC35E2B	Non syndromic sensorineural hearing loss	PM 22037309
	1 1687509 1687604	na	na	Insertion	NADK	Non syndromic sensorineural hearing loss	PM 22037309
	1 1855992 1856076	na	na	Insertion	CFAP74	Non syndromic sensorineural hearing loss	PM 22037309
	1 1867337 1867424	na	na	Insertion	CFAP74	Non syndromic sensorineural hearing loss	PM 22037309
	1 1921292 1921392	na	na	Insertion	CFAP74	Non syndromic sensorineural hearing loss	PM 22037309
	1 2014414 2017244	na	G	Deletion	PRKCZ	Non syndromic sensorineural hearing loss	PM 21293372
	1 2026895 2053222	na	na	Insertion or deletion	PRKCZ	Non syndromic sensorineural hearing loss	PM 18451855
	1 2031320 2031415	na	T	Deletion	PRKCZ	Non syndromic sensorineural hearing loss	PM 21293372
	1 2031320 2031510	na	T	Deletion	PRKCZ	Non syndromic sensorineural hearing loss	PM 21293372
	1 2035486 2035550	na	na	Insertion	PRKCZ	Non syndromic sensorineural hearing loss	PM 22037309
	1 2042867 2043185	na	A	Deletion	PRKCZ	Non syndromic sensorineural hearing loss	PM 21293372
	1 2167120 2167220	na	na	Insertion	SKI	Non syndromic sensorineural hearing loss	PM 22037309
	1 2268326 2284067	na	na	Insertion or deletion	MORN1	Non syndromic sensorineural hearing loss	PM 18451855
	1 2271486 2303278	na	na	Insertion or deletion	MORN1	Non syndromic sensorineural hearing loss	PM 18451855
	1 2342542 2342642	na	na	Insertion	PEX10	Non syndromic sensorineural hearing loss	PM 22037309
	1 2408416 2412411	na	na	Loss	PLCH2	Non syndromic sensorineural hearing loss	PM 17122850
	1 2420948 2421048	na	na	Insertion	PLCH2	Non syndromic sensorineural hearing loss	PM 22037309
	1 2555990 2556442	na	T	Deletion	MMEL1	Non syndromic sensorineural hearing loss	PM 21293372
	1 2577151 2577251	na	na	Insertion	TTC34	Non syndromic sensorineural hearing loss	PM 22037309
	1 2577630 2577683	na	na	Insertion	TTC34	Non syndromic sensorineural hearing loss	PM 22037309
	1 2621432 2646595	na	na	Insertion or deletion	TTC34	Non syndromic sensorineural hearing loss	PM 18451855
	1 2635619 2641005	na	na	Insertion or deletion	TTC34	Non syndromic sensorineural hearing loss	PM 18451855
	1 2648927 2650346	na	na	Insertion or deletion	TTC34	Non syndromic sensorineural hearing loss	PM 18451855
	1 2650682 2653461	na	na	Insertion or deletion	TTC34	Non syndromic sensorineural hearing loss	PM 18451855
	1 2691601 2691676	na	T	Deletion	TTC34	Non syndromic sensorineural hearing loss	PM 21293372
	1 2985453 2985543	na	na	Insertion	LINC00982	Non syndromic sensorineural hearing loss	PM 22037309
	1 3053277 3053377	na	na	Insertion	PRDM16	Non syndromic sensorineural hearing loss	PM 22037309
	1 3205528 3206931	na	G	Deletion	PRDM16	Non syndromic sensorineural hearing loss	PM 21293372
	1 3206482 3206970	na	A	Deletion	PRDM16	Non syndromic sensorineural hearing loss	PM 21293372
	1 3237264 3272344	na	na	Insertion or deletion	PRDM16	Non syndromic sensorineural hearing loss	PM 18451855
	1 3252129 3252238	na	G	Deletion	PRDM16	Non syndromic sensorineural hearing loss	PM 21293372
	1 3263970 3266319	na	G	Deletion	PRDM16	Non syndromic sensorineural hearing loss	PM 21293372
	1 3394332 3394422	na	na	Insertion	ARHGEF16	Non syndromic sensorineural hearing loss	PM 22037309
	1 3416649 3446171	na	na	Insertion or deletion	MEGF6	Non syndromic sensorineural hearing loss	PM 18451855
	1 3445258 3445328	na	na	Insertion	MEGF6	Non syndromic sensorineural hearing loss	PM 22037309
	1 3551601 3551681	na	na	Insertion	WRAP73	Non syndromic sensorineural hearing loss	PM 22037309
	1 3574808 3606801	na	na	Insertion or deletion	TP73	Non syndromic sensorineural hearing loss	PM 18451855
	1 3581413 3581725	na	T	Deletion	TP73	Non syndromic sensorineural hearing loss	PM 21293372
	1 3592579 3592659	na	na	Insertion	TP73	Non syndromic sensorineural hearing loss	PM 22037309
	1 3652005 3652103	na	na	Insertion	TP73	Non syndromic sensorineural hearing loss	PM 22037309
	1 3738796 3738868	na	A	Deletion	CEP104	Non syndromic sensorineural hearing loss	PM 21293372
	1 3785282 3785322	na	na	Insertion	DFFB	Non syndromic sensorineural hearing loss	PM 22037309
	1 3823950 3824031	na	na	Insertion	LINC01134	Non syndromic sensorineural hearing loss	PM 22037309
	1 4288340 4288459	na	na	Insertion	EEF1DP6	Non syndromic sensorineural hearing loss	PM 22037309
	1 4483755 4483855	na	na	Insertion	LOC284661	Non syndromic sensorineural hearing loss	PM 22037309
	1 4819786 4823945	na	na	Insertion or deletion	AJAP1	Non syndromic sensorineural hearing loss	PM 18451855
	1 4823860 4823921	na	na	Insertion	AJAP1	Non syndromic sensorineural hearing loss	PM 22037309
	1 4871077 4884232	na	na	Loss	AJAP1	early passage human iPS cells	PM 21368824
	1 4871077 4886368	na	na	Loss	AJAP1	early passage human iPS cells	PM 21368824
	1 4872046 4887284	na	na	Loss	AJAP1	early passage human iPS cells	PM 21368824
	1 4872046 4901771	na	na	Loss	AJAP1	early passage human iPS cells	PM 21368824
	1 4884759 4884791	na	na	Insertion	AJAP1	Non syndromic sensorineural hearing loss	PM 22037309
	1 4929346 4929446	na	na	Insertion	AJAP1	Non syndromic sensorineural hearing loss	PM 22037309
	1 4960609 4960692	na	na	Insertion	AJAP1	Non syndromic sensorineural hearing loss	PM 22037309
	1 5011917 5079679	na	na	Loss	AJAP1	Schizophrenia	PM 23813976
	1 5065027 5065936	na	T	Deletion	AJAP1	Non syndromic sensorineural hearing loss	PM 21293372
	1 5145595 5145688	na	na	Insertion	AJAP1	Non syndromic sensorineural hearing loss	PM 22037309
	1 5923407 5923456	na	na	Insertion	MIR4689	Non syndromic sensorineural hearing loss	PM 22037309
	1 5987724 5988082	na	G	Deletion	NPHP4	Non syndromic sensorineural hearing loss	PM 21293372
	1 6062915 6063015	na	na	Insertion	KCNAB2	Non syndromic sensorineural hearing loss	PM 22037309
	1 6214377 6214452	na	na	Insertion	CHD5	Non syndromic sensorineural hearing loss	PM 22037309
	1 6300460 6300560	na	na	Insertion	LINC00337	Non syndromic sensorineural hearing loss	PM 22037309
	1 6328349 6328449	na	na	Insertion	ACOT7	Non syndromic sensorineural hearing loss	PM 22037309
	1 6362540 6452776	na	na	Loss	ACOT7	Schizophrenia	PM 23813976
	1 6942565 6942642	na	na	Insertion	CAMTA1	Non syndromic sensorineural hearing loss	PM 22037309
	1 7063417 7097083	na	na	Loss	CAMTA1	Schizophrenia	PM 23813976
	1 7349892 7374254	na	na	Insertion or deletion	CAMTA1	Non syndromic sensorineural hearing loss	PM 18451855
	1 7491801 7494108	na	C	Deletion	CAMTA1	Non syndromic sensorineural hearing loss	PM 21293372
	1 7492404 7494002	na	T	Deletion	CAMTA1	Non syndromic sensorineural hearing loss	PM 19587683
	1 7492405 7494002	na	na	Homozygous copy loss	CAMTA1	Non syndromic sensorineural hearing loss	PM 19587683
	1 7492657 7494097	na	A	Deletion	CAMTA1	Non syndromic sensorineural hearing loss	PM 21293372
	1 7545052 7589574	na	na	Loss	CAMTA1	Schizophrenia	PM 23813976
	1 7568341 7571019	na	T	Deletion	CAMTA1	Non syndromic sensorineural hearing loss	PM 21293372
	1 7625596 7625857	na	T	Deletion	CAMTA1	Non syndromic sensorineural hearing loss	PM 21293372
	1 7854175 7866851	na	na	Loss	PER3	early passage human iPS cells	PM 21368824
	1 8248500 8248600	na	na	Insertion	LOC100129776	Non syndromic sensorineural hearing loss	PM 22037309
	1 8393876 8393966	na	na	Insertion	SLC45A1	Non syndromic sensorineural hearing loss	PM 22037309
	1 8446447 8446637	na	na	Insertion	RERE	Non syndromic sensorineural hearing loss	PM 22037309
	1 8472833 8473913	na	C	Deletion	RERE	Non syndromic sensorineural hearing loss	PM 21293372
	1 8760421 8793956	na	na	Insertion or deletion	RERE	Non syndromic sensorineural hearing loss	PM 18451855
	1 8822507 8850906	na	na	Gain	RERE	Non syndromic sensorineural hearing loss	PM 17122850
	1 9064422 9064457	na	na	Insertion	SLC2A7	Non syndromic sensorineural hearing loss	PM 22037309
	1 9342438 9342523	na	na	Insertion	SPSB1	Non syndromic sensorineural hearing loss	PM 22037309
	1 9362106 9362200	na	na	Insertion	SPSB1	Non syndromic sensorineural hearing loss	PM 22037309
	1 9599368 9599423	na	na	Insertion	SLC25A33	Non syndromic sensorineural hearing loss	PM 22037309
	1 9601562 9622499	na	na	Insertion or deletion	SLC25A33	Non syndromic sensorineural hearing loss	PM 18451855
	1 9604718 9619664	na	na	Insertion or deletion	SLC25A33	Non syndromic sensorineural hearing loss	PM 18451855
	1 9608016 9619382	na	na	Insertion or deletion	SLC25A33	Non syndromic sensorineural hearing loss	PM 18451855
	1 9608089 9628016	na	na	Insertion or deletion	SLC25A33	Non syndromic sensorineural hearing loss	PM 18451855
	1 9609664 9625856	na	na	Insertion or deletion	SLC25A33	Non syndromic sensorineural hearing loss	PM 18451855
	1 9611159 9621263	na	na	Insertion or deletion	SLC25A33	Non syndromic sensorineural hearing loss	PM 18451855
	1 9612112 9620492	na	na	Insertion or deletion	SLC25A33	Non syndromic sensorineural hearing loss	PM 18451855
	1 9717753 9717836	na	na	Insertion	PIK3CD	Non syndromic sensorineural hearing loss	PM 22037309
	1 9912361 9925413	na	C	Deletion	CTNNBIP1	Amyotrophic lateral sclerosis	PM 20685689
	1 9926071 9968143	na	G	Deletion	CTNNBIP1	Amyotrophic lateral sclerosis	PM 20685689
	1 10059836 10059894	na	na	Insertion	RBP7	Non syndromic sensorineural hearing loss	PM 22037309
	1 10273900 10274000	na	na	Insertion	KIF1B	Non syndromic sensorineural hearing loss	PM 22037309
	1 10292056 10301245	na	T	Deletion	KIF1B	Non syndromic sensorineural hearing loss	PM 21293372
	1 10300356 10322502	na	na	Insertion or deletion	KIF1B	Non syndromic sensorineural hearing loss	PM 18451855
	1 10405066 10406366	na	C	Deletion	KIF1B	Non syndromic sensorineural hearing loss	PM 21293372
	1 10405136 10406094	na	C	Deletion	KIF1B	Non syndromic sensorineural hearing loss	PM 21293372
	1 10533748 10533848	na	na	Insertion	DFFA	Non syndromic sensorineural hearing loss	PM 22037309
	1 10594666 10594754	na	na	Insertion	PEX14	Non syndromic sensorineural hearing loss	PM 22037309
	1 10643304 10663228	na	na	Gain	PEX14	early passage human iPS cells	PM 21368824
	1 10644942 10644997	na	A	Deletion	PEX14	Non syndromic sensorineural hearing loss	PM 21293372
	1 10724778 10724878	na	na	Insertion	CASZ1	Non syndromic sensorineural hearing loss	PM 22037309
	1 10738084 10855421	na	na	Loss	CASZ1	Non syndromic sensorineural hearing loss	PM 17122850
	1 11028686 11028761	na	na	Insertion	C1orf127	Non syndromic sensorineural hearing loss	PM 22037309
	1 11310690 11310744	na	na	Insertion	MTOR	Non syndromic sensorineural hearing loss	PM 22037309
	1 11594658 11594757	na	na	Insertion	PTCHD2	Non syndromic sensorineural hearing loss	PM 22037309
	1 11668219 11668262	na	na	Insertion	LOC101929181	Non syndromic sensorineural hearing loss	PM 22037309
	1 12043805 12043905	na	na	Insertion	MFN2	Non syndromic sensorineural hearing loss	PM 22037309
	1 12126165 12126349	na	na	Cn loss	TNFRSF8	Non syndromic sensorineural hearing loss	PM 19587683
	1 12202258 12202358	na	na	Insertion	TNFRSF8	Non syndromic sensorineural hearing loss	PM 22037309
	1 12326872 12371766	na	na	Insertion or deletion	VPS13D	Non syndromic sensorineural hearing loss	PM 18451855
	1 12357789 12357889	na	na	Insertion	VPS13D	Non syndromic sensorineural hearing loss	PM 22037309
	1 12423427 12423498	na	G	Deletion	VPS13D	Non syndromic sensorineural hearing loss	PM 21293372
	1 12644531 12657361	na	na	Gain	DHRS3	early passage human iPS cells	PM 21368824
	1 12820632 12820910	na	T	Deletion	C1orf158	Non syndromic sensorineural hearing loss	PM 21293372
	1 13804286 13804348	na	T	Deletion	LRRC38	Non syndromic sensorineural hearing loss	PM 21293372
	1 13813650 13813750	na	na	Insertion	LRRC38	Non syndromic sensorineural hearing loss	PM 22037309
	1 14035680 14039589	na	A	Deletion	PRDM2	Non syndromic sensorineural hearing loss	PM 21293372
	1 14057107 14057142	na	na	Insertion	PRDM2	Non syndromic sensorineural hearing loss	PM 22037309
	1 14299548 14299628	na	na	Insertion	KAZN	Non syndromic sensorineural hearing loss	PM 22037309
	1 14308680 14311417	na	na	Cn loss	KAZN	Non syndromic sensorineural hearing loss	PM 19587683
	1 14308679 14311417	na	A	Deletion	KAZN	Non syndromic sensorineural hearing loss	PM 19587683
	1 14308894 14310821	na	G	Deletion	KAZN	Non syndromic sensorineural hearing loss	PM 21293372
	1 14308937 14309243	na	T	Deletion	KAZN	Non syndromic sensorineural hearing loss	PM 21293372
	1 14309657 14311525	na	T	Deletion	KAZN	Non syndromic sensorineural hearing loss	PM 21293372
	1 14341487 14762438	na	G	Deletion	KAZN	Bipolar disorder	PM 19114987
	1 14371503 14371653	na	na	Insertion	KAZN	Non syndromic sensorineural hearing loss	PM 22037309
	1 14415179 14415279	na	na	Insertion	KAZN	Non syndromic sensorineural hearing loss	PM 22037309
	1 14436079 14436300	na	na	Insertion	KAZN	Non syndromic sensorineural hearing loss	PM 22037309
	1 14488102 14488252	na	na	Insertion	KAZN	Non syndromic sensorineural hearing loss	PM 22037309
	1 14600630 14600730	na	na	Insertion	KAZN	Non syndromic sensorineural hearing loss	PM 22037309
	1 14603699 14607241	na	G	Deletion	KAZN	Non syndromic sensorineural hearing loss	PM 21293372
	1 14657613 14684792	na	na	Insertion or deletion	KAZN	Non syndromic sensorineural hearing loss	PM 18451855
	1 14668208 14668303	na	na	Insertion	KAZN	Non syndromic sensorineural hearing loss	PM 22037309
	1 14745841 14745941	na	na	Insertion	KAZN	Non syndromic sensorineural hearing loss	PM 22037309
	1 14761492 14761592	na	na	Insertion	KAZN	Non syndromic sensorineural hearing loss	PM 22037309
	1 14903286 14903341	na	na	Insertion	KAZN	Non syndromic sensorineural hearing loss	PM 22037309
	1 15003662 15003737	na	na	Insertion	KAZN	Non syndromic sensorineural hearing loss	PM 22037309
	1 15128849 15133915	na	na	Cn gain	KAZN	Non syndromic sensorineural hearing loss	PM 19587683
	1 15132448 15132650	na	A	Deletion	KAZN	Non syndromic sensorineural hearing loss	PM 21293372
	1 15528254 15528328	na	na	Insertion	TMEM51	Non syndromic sensorineural hearing loss	PM 22037309
	1 15595518 15595618	na	na	Insertion	FHAD1	Non syndromic sensorineural hearing loss	PM 22037309
	1 15661884 15679367	na	na	Loss	FHAD1	early passage human iPS cells	PM 21368824
	1 16011438 16011508	na	na	Insertion	PLEKHM2	Non syndromic sensorineural hearing loss	PM 22037309
	1 16024522 16028006	na	C	Deletion	PLEKHM2	Non syndromic sensorineural hearing loss	PM 21293372
	1 16024529 16028020	na	A	Deletion	PLEKHM2	Non syndromic sensorineural hearing loss	PM 21293372
	1 16024860 16028089	na	G	Deletion	PLEKHM2	Non syndromic sensorineural hearing loss	PM 21293372
	1 16249103 16258844	na	T	Deletion	SPEN	Non syndromic sensorineural hearing loss	PM 21293372
	1 16278455 16278525	na	na	Insertion	ZBTB17	Non syndromic sensorineural hearing loss	PM 22037309
	1 16323989 16324021	na	na	Insertion	LOC101928566	Non syndromic sensorineural hearing loss	PM 22037309
	1 16394009 16394081	na	na	Insertion	FAM131C	Non syndromic sensorineural hearing loss	PM 22037309
	1 16458062 16458133	na	na	Insertion	EPHA2	Non syndromic sensorineural hearing loss	PM 22037309
	1 16465310 16465361	na	T	Deletion	EPHA2	Non syndromic sensorineural hearing loss	PM 21293372
	1 16571475 16571559	na	na	Insertion	FBXO42	Non syndromic sensorineural hearing loss	PM 22037309
	1 16631152 16637123	na	na	Insertion or deletion	FBXO42	Non syndromic sensorineural hearing loss	PM 18451855
	1 16712315 16712405	na	na	Insertion	SZRD1	Non syndromic sensorineural hearing loss	PM 22037309
	1 16776422 16776471	na	na	Insertion	NECAP2	Non syndromic sensorineural hearing loss	PM 22037309
	1 16797817 16820565	na	na	Insertion or deletion	CROCCP3	Non syndromic sensorineural hearing loss	PM 18451855
	1 16890105 16918336	na	na	Loss	NBPF1	early passage human iPS cells	PM 21368824
	1 16891008 16926528	na	na	Cn gain	NBPF1	Non syndromic sensorineural hearing loss	PM 19587683
	1 16917806 16918161	na	C	Deletion	NBPF1	Non syndromic sensorineural hearing loss	PM 21293372
	1 16944009 16945799	na	C	Deletion	CROCCP2	Non syndromic sensorineural hearing loss	PM 21293372
	1 16957539 16957596	na	na	Insertion	CROCCP2	Non syndromic sensorineural hearing loss	PM 22037309
	1 17255149 17265567	na	na	Gain	CROCC	early passage human iPS cells	PM 21368824
	1 17355039 17366718	na	na	Insertion or deletion	SDHB	Non syndromic sensorineural hearing loss	PM 18451855
	1 17379531 17379631	na	na	Insertion	SDHB	Non syndromic sensorineural hearing loss	PM 22037309
	1 17393368 17393468	na	na	Insertion	PADI2	Non syndromic sensorineural hearing loss	PM 22037309
	1 17401898 17430014	na	na	Gain	PADI2	early passage human iPS cells	PM 21368824
	1 17521545 17521645	na	na	Insertion	LOC400743	Non syndromic sensorineural hearing loss	PM 22037309
	1 17534339 17564314	na	na	Gain	PADI1	early passage human iPS cells	PM 21368824
	1 17547672 17547772	na	na	Insertion	PADI1	Non syndromic sensorineural hearing loss	PM 22037309
	1 17548472 17549976	na	G	Deletion	PADI1	Non syndromic sensorineural hearing loss	PM 21293372
	1 17548473 17551517	na	na	Duplication	PADI1	Non syndromic sensorineural hearing loss	PM 21293372
	1 17548693 17550394	na	G	Deletion	PADI1	Non syndromic sensorineural hearing loss	PM 19587683
	1 17548759 17550252	na	C	Deletion	PADI1	Non syndromic sensorineural hearing loss	PM 21293372
	1 17557351 17557673	na	G	Deletion	PADI1	Non syndromic sensorineural hearing loss	PM 21293372
	1 17575250 17609299	na	na	Insertion or deletion	PADI3	Non syndromic sensorineural hearing loss	PM 18451855
	1 17647560 17647660	na	na	Insertion	PADI4	Non syndromic sensorineural hearing loss	PM 22037309
	1 17750508 17750577	na	na	Insertion	RCC2	Non syndromic sensorineural hearing loss	PM 22037309
	1 17925154 17925254	na	na	Insertion	ARHGEF10L	Non syndromic sensorineural hearing loss	PM 22037309
	1 18135793 18135893	na	na	Insertion	ACTL8	Non syndromic sensorineural hearing loss	PM 22037309
	1 18399097 18399197	na	na	Insertion	LOC101927876	Non syndromic sensorineural hearing loss	PM 22037309
	1 18449697 18478191	na	na	Loss	IGSF21	Schizophrenia	PM 23813976
	1 18482886 18483030	na	na	Insertion	IGSF21	Non syndromic sensorineural hearing loss	PM 22037309
	1 18529665 18529761	na	C	Deletion	IGSF21	Non syndromic sensorineural hearing loss	PM 21293372
	1 18553922 18553972	na	A	Deletion	IGSF21	Non syndromic sensorineural hearing loss	PM 21293372
	1 18618237 18663887	na	na	Insertion or deletion	IGSF21	Non syndromic sensorineural hearing loss	PM 18451855
	1 18676692 18689203	na	na	Gain	IGSF21	early passage human iPS cells	PM 21368824
	1 18977363 18989065	na	na	Gain	PAX7	early passage human iPS cells	PM 21368824
	1 19021539 19021603	na	na	Insertion	PAX7	Non syndromic sensorineural hearing loss	PM 22037309
	1 19024406 19024893	na	C	Deletion	PAX7	Non syndromic sensorineural hearing loss	PM 21293372
	1 19242422 19243743	na	C	Deletion	IFFO2	Non syndromic sensorineural hearing loss	PM 21293372
	1 19256273 19256353	na	na	Insertion	IFFO2	Non syndromic sensorineural hearing loss	PM 22037309
	1 19401446 19401533	na	na	Insertion	UBR4	Non syndromic sensorineural hearing loss	PM 22037309
	1 19471374 19485984	na	T	Deletion	UBR4	Non syndromic sensorineural hearing loss	PM 21293372
	1 19472219 19487114	na	na	Copy number	UBR4	Non syndromic sensorineural hearing loss	PM 19812545
	1 19476604 19481180	na	na	Insertion or deletion	UBR4	Non syndromic sensorineural hearing loss	PM 18451855
	1 19519776 19520928	na	T	Deletion	UBR4	Non syndromic sensorineural hearing loss	PM 21293372
	1 19634014 19634179	na	C	Deletion	AKR7A2	Non syndromic sensorineural hearing loss	PM 21293372
	1 19683950 19684045	na	na	Insertion	CAPZB	Non syndromic sensorineural hearing loss	PM 22037309
	1 19970327 19970403	na	na	Insertion	MINOS1 NBL1	Non syndromic sensorineural hearing loss	PM 22037309
	1 20058329 20058429	na	na	Insertion	TMCO4	Non syndromic sensorineural hearing loss	PM 22037309
	1 20152094 20152192	na	na	Insertion	RNF186	Non syndromic sensorineural hearing loss	PM 22037309
	1 20217094 20217194	na	na	Insertion	OTUD3	Non syndromic sensorineural hearing loss	PM 22037309
	1 20685928 20685960	na	na	Insertion	LINC01141	Non syndromic sensorineural hearing loss	PM 22037309
	1 20687851 20687951	na	na	Insertion	LINC01141	Non syndromic sensorineural hearing loss	PM 22037309
	1 20736588 20737302	na	A	Deletion	LINC01141	Non syndromic sensorineural hearing loss	PM 21293372
	1 20757071 20757126	na	na	Insertion	LINC01141	Non syndromic sensorineural hearing loss	PM 22037309
	1 20927253 20927347	na	na	Insertion	CDA	Non syndromic sensorineural hearing loss	PM 22037309
	1 21049866 21049961	na	na	Insertion	SH2D5	Non syndromic sensorineural hearing loss	PM 22037309
	1 21193003 21193103	na	na	Insertion	EIF4G3	Non syndromic sensorineural hearing loss	PM 22037309
	1 21375416 21375932	na	na	Gain	EIF4G3	Autism	PM 21865298
	1 21564484 21588922	na	na	Loss	ECE1	Schizophrenia	PM 23813976
	1 21659005 21659277	na	T	Deletion	ECE1	Non syndromic sensorineural hearing loss	PM 21293372
	1 21660316 21660380	na	G	Deletion	ECE1	Non syndromic sensorineural hearing loss	PM 21293372
	1 21660332 21660396	na	A	Deletion	ECE1	Non syndromic sensorineural hearing loss	PM 21293372
	1 21884913 21884999	na	G	Deletion	ALPL	Non syndromic sensorineural hearing loss	PM 21293372
	1 21939795 21939868	na	na	Insertion	RAP1GAP	Non syndromic sensorineural hearing loss	PM 22037309
	1 22042832 22042930	na	na	Insertion	USP48	Non syndromic sensorineural hearing loss	PM 22037309
	1 22088608 22088832	na	A	Deletion	USP48	Non syndromic sensorineural hearing loss	PM 21293372
	1 22161605 22195710	na	na	Insertion or deletion	HSPG2	Non syndromic sensorineural hearing loss	PM 18451855
	1 22162544 22162623	na	na	Insertion	HSPG2	Non syndromic sensorineural hearing loss	PM 22037309
	1 22193098 22209830	na	na	Gain	HSPG2	Schizophrenia	PM 23813976
	1 22460870 22481227	na	na	Insertion or deletion	WNT4	Non syndromic sensorineural hearing loss	PM 18451855
	1 22676675 22676770	na	na	Insertion	LOC101060363	Non syndromic sensorineural hearing loss	PM 22037309
	1 22776986 22777082	na	na	Gain	ZBTB40	Non syndromic sensorineural hearing loss	PM 19587683
	1 22780831 22780931	na	na	Insertion	ZBTB40	Non syndromic sensorineural hearing loss	PM 22037309
	1 23055135 23055235	na	na	Insertion	EPHB2	Non syndromic sensorineural hearing loss	PM 22037309
	1 23149675 23168352	na	na	Insertion or deletion	EPHB2	Non syndromic sensorineural hearing loss	PM 18451855
	1 23150463 23167258	na	na	Gain	EPHB2	early passage human iPS cells	PM 21368824
	1 23183977 23211560	na	na	Cn loss	EPHB2	Non syndromic sensorineural hearing loss	PM 19587683
	1 23284965 23285060	na	na	Insertion	LACTBL1	Non syndromic sensorineural hearing loss	PM 22037309
	1 23346532 23358079	na	na	Insertion or deletion	KDM1A	Non syndromic sensorineural hearing loss	PM 18451855
	1 23346594 23354376	na	na	Insertion or deletion	KDM1A	Non syndromic sensorineural hearing loss	PM 18451855
	1 23347017 23350716	na	na	Insertion or deletion	KDM1A	Non syndromic sensorineural hearing loss	PM 18451855
	1 23347985 23350309	na	na	Insertion or deletion	KDM1A	Non syndromic sensorineural hearing loss	PM 18451855
	1 23348039 23352775	na	na	Insertion or deletion	KDM1A	Non syndromic sensorineural hearing loss	PM 18451855
	1 23759113 23759212	na	na	Insertion	ASAP3	Non syndromic sensorineural hearing loss	PM 22037309
	1 24019328 24019383	na	na	Insertion	RPL11	Non syndromic sensorineural hearing loss	PM 22037309
	1 24237419 24271527	na	na	Insertion or deletion	CNR2	Non syndromic sensorineural hearing loss	PM 18451855
	1 24241533 24241633	na	na	Insertion	CNR2	Non syndromic sensorineural hearing loss	PM 22037309
	1 24255670 24255770	na	na	Insertion	CNR2	Non syndromic sensorineural hearing loss	PM 22037309
	1 24275572 24275889	na	G	Deletion	CNR2	Non syndromic sensorineural hearing loss	PM 21293372
	1 24392934 24396249	na	G	Deletion	MYOM3	Non syndromic sensorineural hearing loss	PM 21293372
	1 24423601 24423681	na	na	Insertion	MYOM3	Non syndromic sensorineural hearing loss	PM 22037309
	1 24508007 24508107	na	na	Insertion	IFNLR1	Non syndromic sensorineural hearing loss	PM 22037309
	1 24768247 24773372	na	T	Deletion	NIPAL3	Non syndromic sensorineural hearing loss	PM 21293372
	1 24774926 24775010	na	na	Insertion	NIPAL3	Non syndromic sensorineural hearing loss	PM 22037309
	1 24858220 24858300	na	na	Insertion	RCAN3	Non syndromic sensorineural hearing loss	PM 22037309
	1 25074408 25076222	na	C	Deletion	CLIC4	Non syndromic sensorineural hearing loss	PM 21293372
	1 25088284 25088384	na	na	Insertion	CLIC4	Non syndromic sensorineural hearing loss	PM 22037309
	1 25262023 25262123	na	na	Insertion	RUNX3	Non syndromic sensorineural hearing loss	PM 22037309
	1 25268924 25301303	na	na	Insertion or deletion	RUNX3	Non syndromic sensorineural hearing loss	PM 18451855
	1 25687226 25687326	na	na	Insertion	TMEM50A	Non syndromic sensorineural hearing loss	PM 22037309
	1 25814359 25814452	na	na	Insertion	TMEM57	Non syndromic sensorineural hearing loss	PM 22037309
	1 25961529 25965424	na	na	Cn gain	MAN1C1	Non syndromic sensorineural hearing loss	PM 19587683
	1 25969202 25969292	na	na	Insertion	MAN1C1	Non syndromic sensorineural hearing loss	PM 22037309
	1 25978319 25978819	na	T	Deletion	MAN1C1	Non syndromic sensorineural hearing loss	PM 21293372
	1 25997615 26031056	na	na	Insertion or deletion	MAN1C1	Non syndromic sensorineural hearing loss	PM 18451855
	1 26021525 26021853	na	A	Deletion	MAN1C1	Non syndromic sensorineural hearing loss	PM 21293372
	1 26040430 26097220	na	na	Gain	MAN1C1	early passage human iPS cells	PM 21368824
	1 26046139 26082751	na	na	Gain	MAN1C1	early passage human iPS cells	PM 21368824
	1 26140994 26141687	na	G	Deletion	SEPN1	Non syndromic sensorineural hearing loss	PM 21293372
	1 26322882 26323584	na	na	Cn loss	PAFAH2	Non syndromic sensorineural hearing loss	PM 19587683
	1 26362399 26362725	na	C	Deletion	EXTL1	Non syndromic sensorineural hearing loss	PM 21293372
	1 26369726 26369826	na	na	Insertion	SLC30A2	Non syndromic sensorineural hearing loss	PM 22037309
	1 26394732 26394832	na	na	Insertion	TRIM63	Non syndromic sensorineural hearing loss	PM 22037309
	1 26544092 26544245	na	G	Deletion	LOC100420494	Non syndromic sensorineural hearing loss	PM 21293372
	1 26696881 26696966	na	na	Insertion	ZNF683	Non syndromic sensorineural hearing loss	PM 22037309
	1 26867726 26888456	na	na	Insertion or deletion	RPS6KA1	Non syndromic sensorineural hearing loss	PM 18451855
	1 26868841 26868941	na	na	Insertion	RPS6KA1	Non syndromic sensorineural hearing loss	PM 22037309
	1 27023546 27023605	na	na	Insertion	LOC101928728	Non syndromic sensorineural hearing loss	PM 22037309
	1 27160254 27160649	na	G	Deletion	ZDHHC18	Non syndromic sensorineural hearing loss	PM 21293372
	1 27238548 27238635	na	na	Insertion	NR0B2	Non syndromic sensorineural hearing loss	PM 22037309
	1 27275742 27275792	na	na	Insertion	KDF1	Non syndromic sensorineural hearing loss	PM 22037309
	1 27441725 27441788	na	na	Insertion	SLC9A1	Non syndromic sensorineural hearing loss	PM 22037309
	1 27676699 27677028	na	T	Deletion	SYTL1	Non syndromic sensorineural hearing loss	PM 21293372
	1 27744219 27744319	na	na	Insertion	WASF2	Non syndromic sensorineural hearing loss	PM 22037309
	1 27807939 27808100	na	G	Deletion	WASF2	Non syndromic sensorineural hearing loss	PM 21293372
	1 27858932 27859014	na	na	Insertion	AHDC1	Non syndromic sensorineural hearing loss	PM 22037309
	1 27877249 27877324	na	na	Insertion	AHDC1	Non syndromic sensorineural hearing loss	PM 22037309
	1 27931878 27931978	na	na	Insertion	AHDC1	Non syndromic sensorineural hearing loss	PM 22037309
	1 27949635 27949735	na	na	Insertion	FGR	Non syndromic sensorineural hearing loss	PM 22037309
	1 28120386 28120695	na	A	Deletion	STX12	Non syndromic sensorineural hearing loss	PM 21293372
	1 28200542 28200642	na	A	Deletion	THEMIS2	Non syndromic sensorineural hearing loss	PM 21293372
	1 28347775 28379652	na	na	Insertion or deletion	EYA3	Non syndromic sensorineural hearing loss	PM 18451855
	1 28356864 28366637	na	na	Insertion or deletion	EYA3	Non syndromic sensorineural hearing loss	PM 18451855
	1 28362096 28370342	na	na	Insertion or deletion	EYA3	Non syndromic sensorineural hearing loss	PM 18451855
	1 28362533 28377397	na	na	Insertion or deletion	EYA3	Non syndromic sensorineural hearing loss	PM 18451855
	1 28470961 28471061	na	na	Insertion	RNU7 29P	Non syndromic sensorineural hearing loss	PM 22037309
	1 28556595 28556660	na	na	Insertion	DNAJC8	Non syndromic sensorineural hearing loss	PM 22037309
	1 28810774 28820198	na	na	Cn loss	PHACTR4	Non syndromic sensorineural hearing loss	PM 19587683
	1 29395216 29395316	na	na	Insertion	EPB41	Non syndromic sensorineural hearing loss	PM 22037309
	1 29655432 29655532	na	na	Insertion	LOC101928460	Non syndromic sensorineural hearing loss	PM 22037309
	1 30201199 30222177	na	na	Insertion or deletion	LOC101929406	Non syndromic sensorineural hearing loss	PM 18451855
	1 30226635 30226706	na	na	Insertion	LOC101929406	Non syndromic sensorineural hearing loss	PM 22037309
	1 30261321 30261421	na	na	Insertion	LOC101929406	Non syndromic sensorineural hearing loss	PM 22037309
	1 30302949 30303003	na	na	Insertion	LOC101929406	Non syndromic sensorineural hearing loss	PM 22037309
	1 30420920 30421020	na	na	Insertion	LOC101929406	Non syndromic sensorineural hearing loss	PM 22037309
	1 30436285 30436317	na	na	Insertion	LOC101929406	Non syndromic sensorineural hearing loss	PM 22037309
	1 30436896 30437021	na	G	Deletion	LOC101929406	Non syndromic sensorineural hearing loss	PM 21293372
	1 30441339 30475485	na	na	Insertion or deletion	LOC101929406	Non syndromic sensorineural hearing loss	PM 18451855
	1 30471890 30471990	na	na	Insertion	LOC101929406	Non syndromic sensorineural hearing loss	PM 22037309
	1 30478850 30478933	na	na	Insertion	LOC101929406	Non syndromic sensorineural hearing loss	PM 22037309
	1 30506577 30506651	na	na	Insertion	LOC101929406	Non syndromic sensorineural hearing loss	PM 22037309
	1 30510995 30512660	na	na	Duplication	LOC101929406	Non syndromic sensorineural hearing loss	PM 21293372
	1 30511207 30512518	na	C	Deletion	LOC101929406	Non syndromic sensorineural hearing loss	PM 21293372
	1 30522869 30522927	na	na	Insertion	LOC101929406	Non syndromic sensorineural hearing loss	PM 22037309
	1 30540669 30552122	na	na	Insertion or deletion	LOC101929406	Non syndromic sensorineural hearing loss	PM 18451855
	1 30541524 30541624	na	na	Insertion	LOC101929406	Non syndromic sensorineural hearing loss	PM 22037309
	1 30542584 30550014	na	na	Insertion or deletion	LOC101929406	Non syndromic sensorineural hearing loss	PM 18451855
	1 31199430 31199530	na	na	Insertion	MATN1 AS1	Non syndromic sensorineural hearing loss	PM 22037309
	1 31347231 31348424	na	C	Deletion	SDC3	Non syndromic sensorineural hearing loss	PM 21293372
	1 31464189 31464289	na	na	Insertion	PUM1	Non syndromic sensorineural hearing loss	PM 22037309
	1 31492592 31495110	na	A	Deletion	PUM1	Non syndromic sensorineural hearing loss	PM 21293372
	1 31653803 31662442	na	na	Insertion or deletion	NKAIN1	Non syndromic sensorineural hearing loss	PM 18451855
	1 31669832 31699486	na	na	Insertion or deletion	NKAIN1	Non syndromic sensorineural hearing loss	PM 18451855
	1 31897535 31897600	na	na	Insertion	SERINC2	Non syndromic sensorineural hearing loss	PM 22037309
	1 31991002 31991102	na	na	Insertion	LINC01226	Non syndromic sensorineural hearing loss	PM 22037309
	1 32146299 32146385	na	A	Deletion	COL16A1	Non syndromic sensorineural hearing loss	PM 21293372
	1 32221830 32224443	na	na	Cn loss	BAI2	Non syndromic sensorineural hearing loss	PM 19587683
	1 32221829 32224443	na	G	Deletion	BAI2	Non syndromic sensorineural hearing loss	PM 19587683
	1 32499274 32499374	na	na	Insertion	KHDRBS1	Non syndromic sensorineural hearing loss	PM 22037309
	1 32665770 32665870	na	na	Insertion	TXLNA	Non syndromic sensorineural hearing loss	PM 22037309
	1 32671217 32671307	na	na	Insertion	CCDC28B	Non syndromic sensorineural hearing loss	PM 22037309
	1 32796632 32796711	na	na	Insertion	HDAC1	Non syndromic sensorineural hearing loss	PM 22037309
	1 32893053 32916689	na	na	Insertion or deletion	LOC101929254	Non syndromic sensorineural hearing loss	PM 18451855
	1 33013234 33013309	na	na	Insertion	ZBTB8A	Non syndromic sensorineural hearing loss	PM 22037309
	1 33090049 33090119	na	na	Insertion	ZBTB8OS	Non syndromic sensorineural hearing loss	PM 22037309
	1 33328940 33329040	na	na	Insertion	FNDC5	Non syndromic sensorineural hearing loss	PM 22037309
	1 33350199 33350239	na	na	Insertion	HPCA	Non syndromic sensorineural hearing loss	PM 22037309
	1 33455162 33455245	na	na	Insertion	LOC100419257	Non syndromic sensorineural hearing loss	PM 22037309
	1 33797262 33797607	na	na	Cn gain	PHC2	Non syndromic sensorineural hearing loss	PM 19587683
	1 33808184 33808281	na	na	Insertion	PHC2	Non syndromic sensorineural hearing loss	PM 22037309
	1 34000067 34000152	na	na	Insertion	CSMD2	Non syndromic sensorineural hearing loss	PM 22037309
	1 34340761 34340856	na	C	Deletion	CSMD2	Non syndromic sensorineural hearing loss	PM 21293372
	1 34340805 34340862	na	T	Deletion	CSMD2	Non syndromic sensorineural hearing loss	PM 21293372
	1 34425063 34455316	na	na	Insertion or deletion	CSMD2	Non syndromic sensorineural hearing loss	PM 18451855
	1 34532640 34577764	na	na	Insertion or deletion	CSMD2	Non syndromic sensorineural hearing loss	PM 18451855
	1 34677589 34677684	na	na	Insertion	C1orf94	Non syndromic sensorineural hearing loss	PM 22037309
	1 35248854 35252559	na	na	Insertion or deletion	GJB3	Non syndromic sensorineural hearing loss	PM 18451855
	1 35333167 35333250	na	na	Insertion	DLGAP3	Non syndromic sensorineural hearing loss	PM 22037309
	1 35390831 35390918	na	na	Insertion	DLGAP3	Non syndromic sensorineural hearing loss	PM 22037309
	1 35830712 35830862	na	na	Insertion	ZMYM4	Non syndromic sensorineural hearing loss	PM 22037309
	1 36318950 36319050	na	na	Insertion	AGO4	Non syndromic sensorineural hearing loss	PM 22037309
	1 36420268 36464673	na	na	Insertion or deletion	AGO3	Non syndromic sensorineural hearing loss	PM 18451855
	1 36521804 36521856	na	T	Deletion	AGO3	Non syndromic sensorineural hearing loss	PM 21293372
	1 36898381 36898481	na	na	Insertion	OSCP1	Non syndromic sensorineural hearing loss	PM 22037309
	1 37325531 37370650	na	na	Insertion or deletion	GRIK3	Non syndromic sensorineural hearing loss	PM 18451855
	1 37353610 37353709	na	na	Insertion	GRIK3	Non syndromic sensorineural hearing loss	PM 22037309
	1 37362445 37396097	na	na	Insertion or deletion	GRIK3	Non syndromic sensorineural hearing loss	PM 18451855
	1 37475216 37485566	na	na	Insertion or deletion	GRIK3	Non syndromic sensorineural hearing loss	PM 18451855
	1 37919829 37920400	na	na	Cn loss	LINC01137	Non syndromic sensorineural hearing loss	PM 19587683
	1 37932694 37932794	na	na	Insertion	LINC01137	Non syndromic sensorineural hearing loss	PM 22037309
	1 37980832 37980995	na	C	Deletion	MEAF6	Non syndromic sensorineural hearing loss	PM 21293372
	1 38004870 38004970	na	na	Insertion	SNIP1	Non syndromic sensorineural hearing loss	PM 22037309
	1 38048341 38048441	na	na	Insertion	GNL2	Non syndromic sensorineural hearing loss	PM 22037309
	1 38086948 38087044	na	na	Insertion	RSPO1	Non syndromic sensorineural hearing loss	PM 22037309
	1 38199587 38199686	na	na	Insertion	EPHA10	Non syndromic sensorineural hearing loss	PM 22037309
	1 38241217 38241296	na	na	Insertion	ACTN4P2	Non syndromic sensorineural hearing loss	PM 22037309
	1 38357621 38372178	na	na	Insertion or deletion	INPP5B	Non syndromic sensorineural hearing loss	PM 18451855
	1 38374840 38381444	na	na	Insertion or deletion	INPP5B	Non syndromic sensorineural hearing loss	PM 18451855
	1 38375057 38377329	na	A	Deletion	INPP5B	Non syndromic sensorineural hearing loss	PM 21293372
	1 38466052 38466114	na	na	Insertion	FHL3	Non syndromic sensorineural hearing loss	PM 22037309
	1 39561057 39562375	na	na	Cn loss	MACF1	Non syndromic sensorineural hearing loss	PM 19587683
	1 39573249 39573330	na	na	Insertion	MACF1	Non syndromic sensorineural hearing loss	PM 22037309
	1 39725551 39758832	na	na	Insertion or deletion	MACF1	Non syndromic sensorineural hearing loss	PM 18451855
	1 39734400 39734522	na	C	Deletion	MACF1	Non syndromic sensorineural hearing loss	PM 21293372
	1 39771282 39773791	na	T	Deletion	MACF1	Non syndromic sensorineural hearing loss	PM 21293372
	1 39779114 39811605	na	na	Insertion or deletion	MACF1	Non syndromic sensorineural hearing loss	PM 18451855
	1 40004659 40004702	na	na	Insertion	PPIEL	Non syndromic sensorineural hearing loss	PM 22037309
	1 40309738 40309818	na	na	Insertion	TRIT1	Non syndromic sensorineural hearing loss	PM 22037309
	1 40524566 40524666	na	na	Insertion	CAP1	Non syndromic sensorineural hearing loss	PM 22037309
	1 40551605 40551705	na	na	Insertion	PPT1	Non syndromic sensorineural hearing loss	PM 22037309
	1 40734933 40735349	na	G	Deletion	ZMPSTE24	Non syndromic sensorineural hearing loss	PM 21293372
	1 40739359 40743158	na	C	Deletion	ZMPSTE24	Non syndromic sensorineural hearing loss	PM 21293372
	1 40740138 40743009	na	T	Deletion	ZMPSTE24	Non syndromic sensorineural hearing loss	PM 19587683
	1 40740139 40743009	na	na	Homozygous copy loss	ZMPSTE24	Non syndromic sensorineural hearing loss	PM 19587683
	1 40758951 40759051	na	na	Insertion	ZMPSTE24	Non syndromic sensorineural hearing loss	PM 22037309
	1 40862387 40862472	na	na	Insertion	SMAP2	Non syndromic sensorineural hearing loss	PM 22037309
	1 40881035 40881141	na	T	Deletion	SMAP2	Non syndromic sensorineural hearing loss	PM 21293372
	1 40915026 40915126	na	na	Insertion	ZFP69B	Non syndromic sensorineural hearing loss	PM 22037309
	1 40982558 40982658	na	na	Insertion	EXO5	Non syndromic sensorineural hearing loss	PM 22037309
	1 41131777 41131809	na	na	Insertion	RIMS3	Non syndromic sensorineural hearing loss	PM 22037309
	1 41516457 41517096	na	G	Deletion	SCMH1	Non syndromic sensorineural hearing loss	PM 21293372
	1 41517232 41517294	na	A	Deletion	SCMH1	Non syndromic sensorineural hearing loss	PM 21293372
	1 41568573 41568673	na	na	Insertion	SCMH1	Non syndromic sensorineural hearing loss	PM 22037309
	1 41614591 41659711	na	na	Insertion or deletion	SCMH1	Non syndromic sensorineural hearing loss	PM 18451855
	1 42035692 42035792	na	na	Insertion	HIVEP3	Non syndromic sensorineural hearing loss	PM 22037309
	1 42302961 42337564	na	na	Insertion or deletion	HIVEP3	Non syndromic sensorineural hearing loss	PM 18451855
	1 42439646 42439746	na	na	Insertion	HIVEP3	Non syndromic sensorineural hearing loss	PM 22037309
	1 42780787 42781110	na	A	Deletion	FOXJ3	Non syndromic sensorineural hearing loss	PM 21293372
	1 42909593 42911039	na	C	Deletion	ZMYND12	Non syndromic sensorineural hearing loss	PM 21293372
	1 42924084 42924184	na	na	Insertion	PPCS	Non syndromic sensorineural hearing loss	PM 22037309
	1 42963906 42963952	na	na	Insertion	TMSB4XP1	Non syndromic sensorineural hearing loss	PM 22037309
	1 43041557 43075603	na	na	Insertion or deletion	CCDC30	Non syndromic sensorineural hearing loss	PM 18451855
	1 43157262 43157642	na	A	Deletion	YBX1	Non syndromic sensorineural hearing loss	PM 21293372
	1 43310896 43311630	na	T	Deletion	ERMAP	Non syndromic sensorineural hearing loss	PM 21293372
	1 43391044 43424847	na	G	Deletion	SLC2A1	Epilepsy	PM 20923578
	1 43444592 43444691	na	na	Insertion	SLC2A1 AS1	Non syndromic sensorineural hearing loss	PM 22037309
	1 43621891 43621991	na	na	Insertion	FAM183A	Non syndromic sensorineural hearing loss	PM 22037309
	1 43630042 43630377	na	G	Deletion	EBNA1BP2	Non syndromic sensorineural hearing loss	PM 21293372
	1 43637337 43637437	na	na	Insertion	EBNA1BP2	Non syndromic sensorineural hearing loss	PM 22037309
	1 43645479 43645564	na	na	Insertion	CFAP57	Non syndromic sensorineural hearing loss	PM 22037309
	1 43683345 43683445	na	na	Insertion	CFAP57	Non syndromic sensorineural hearing loss	PM 22037309
	1 43825983 43826083	na	na	Insertion	CDC20	Non syndromic sensorineural hearing loss	PM 22037309
	1 43830144 43830183	na	na	Insertion	CDC20	Non syndromic sensorineural hearing loss	PM 22037309
	1 43892913 43892967	na	na	Insertion	SZT2	Non syndromic sensorineural hearing loss	PM 22037309
	1 43999975 44000065	na	na	Insertion	PTPRF	Non syndromic sensorineural hearing loss	PM 22037309
	1 44208771 44208912	na	na	Insertion	ST3GAL3	Non syndromic sensorineural hearing loss	PM 22037309
	1 44462989 44463041	na	na	Insertion	CCDC24	Non syndromic sensorineural hearing loss	PM 22037309
	1 44552443 44552543	na	na	Insertion	KLF17	Non syndromic sensorineural hearing loss	PM 22037309
	1 44586016 44586106	na	na	Insertion	KLF17	Non syndromic sensorineural hearing loss	PM 22037309
	1 44595978 44596277	na	G	Deletion	KLF17	Non syndromic sensorineural hearing loss	PM 21293372
	1 44728571 44728626	na	na	Insertion	ERI3	Non syndromic sensorineural hearing loss	PM 22037309
	1 44738068 44739866	na	T	Deletion	ERI3	Non syndromic sensorineural hearing loss	PM 21293372
	1 44793764 44794849	na	T	Deletion	ERI3	Non syndromic sensorineural hearing loss	PM 21293372
	1 44883717 44883802	na	na	Insertion	RNF220	Non syndromic sensorineural hearing loss	PM 22037309
	1 45027118 45067146	na	na	Gain	RNF220	early passage human iPS cells	PM 21368824
	1 45051643 45056315	na	G	Deletion	RNF220	Non syndromic sensorineural hearing loss	PM 21293372
	1 45087423 45087500	na	T	Deletion	RNF220	Non syndromic sensorineural hearing loss	PM 21293372
	1 45196741 45196840	na	na	Insertion	RNU5D 1	Non syndromic sensorineural hearing loss	PM 22037309
	1 45251361 45251446	na	na	Insertion	BEST4	Non syndromic sensorineural hearing loss	PM 22037309
	1 45264042 45264115	na	na	Insertion	PLK3	Non syndromic sensorineural hearing loss	PM 22037309
	1 45269123 45269155	na	na	Insertion	PLK3	Non syndromic sensorineural hearing loss	PM 22037309
	1 45286782 45286882	na	na	Insertion	PTCH2	Non syndromic sensorineural hearing loss	PM 22037309
	1 45363340 45363430	na	na	Insertion	EIF2B3	Non syndromic sensorineural hearing loss	PM 22037309
	1 45481226 45481887	na	C	Deletion	UROD	Non syndromic sensorineural hearing loss	PM 21293372
	1 45603586 45603670	na	na	Insertion	ZSWIM5	Non syndromic sensorineural hearing loss	PM 22037309
	1 45817942 45818032	na	na	Insertion	TESK2	Non syndromic sensorineural hearing loss	PM 22037309
	1 45979873 45980185	na	A	Deletion	PRDX1	Non syndromic sensorineural hearing loss	PM 21293372
	1 46049188 46049261	na	na	Insertion	NASP	Non syndromic sensorineural hearing loss	PM 22037309
	1 46138694 46139023	na	T	Deletion	GPBP1L1	Non syndromic sensorineural hearing loss	PM 21293372
	1 46167127 46183244	na	na	Loss	IPP	early passage human iPS cells	PM 21368824
	1 46575256 46575546	na	A	Deletion	PIK3R3	Non syndromic sensorineural hearing loss	PM 21293372
	1 46575919 46576211	na	G	Deletion	PIK3R3	Non syndromic sensorineural hearing loss	PM 21293372
	1 46806796 46806888	na	na	Insertion	NSUN4	Non syndromic sensorineural hearing loss	PM 22037309
	1 46861486 46861533	na	na	Insertion	FAAH	Non syndromic sensorineural hearing loss	PM 22037309
	1 46871946 46872189	na	na	Cn loss	FAAH	Non syndromic sensorineural hearing loss	PM 19587683
	1 46980633 46980681	na	na	Insertion	DMBX1	Non syndromic sensorineural hearing loss	PM 22037309
	1 47280969 47281069	na	na	Insertion	CYP4B1	Non syndromic sensorineural hearing loss	PM 22037309
	1 47695654 47695718	na	na	Insertion	TAL1	Non syndromic sensorineural hearing loss	PM 22037309
	1 48267787 48267887	na	na	Insertion	TRABD2B	Non syndromic sensorineural hearing loss	PM 22037309
	1 48706744 48706824	na	na	Insertion	SLC5A9	Non syndromic sensorineural hearing loss	PM 22037309
	1 48813495 48847154	na	na	Insertion or deletion	SPATA6	Non syndromic sensorineural hearing loss	PM 18451855
	1 48841462 48842096	na	T	Deletion	SPATA6	Non syndromic sensorineural hearing loss	PM 21293372
	1 49014463 49014563	na	na	Insertion	AGBL4	Non syndromic sensorineural hearing loss	PM 22037309
	1 49226941 49227041	na	na	Insertion	AGBL4	Non syndromic sensorineural hearing loss	PM 22037309
	1 49313712 49320229	na	na	Cn gain	AGBL4	Non syndromic sensorineural hearing loss	PM 19587683
	1 49337980 49517287	na	na	Loss	AGBL4	Schizophrenia	PM 23813976
	1 49668139 50099851	na	A	Deletion	AGBL4	Non syndromic sensorineural hearing loss	PM 21293372
	1 49676012 49676077	na	A	Deletion	AGBL4	Non syndromic sensorineural hearing loss	PM 21293372
	1 49685647 49770826	na	na	Loss	AGBL4	Autism	PM 20531469
	1 50212281 50261244	na	na	Insertion or deletion	AGBL4	Non syndromic sensorineural hearing loss	PM 18451855
	1 50556410 50556510	na	na	Insertion	ELAVL4	Non syndromic sensorineural hearing loss	PM 22037309
	1 51369823 51369923	na	na	Insertion	FAF1	Non syndromic sensorineural hearing loss	PM 22037309
	1 51513966 51513998	na	na	Insertion	C1orf185	Non syndromic sensorineural hearing loss	PM 22037309
	1 51536281 51536381	na	na	Insertion	C1orf185	Non syndromic sensorineural hearing loss	PM 22037309
	1 51581741 51581820	na	na	Insertion	C1orf185	Non syndromic sensorineural hearing loss	PM 22037309
	1 51981375 51981453	na	na	Insertion	EPS15	Non syndromic sensorineural hearing loss	PM 22037309
	1 52033062 52033160	na	na	Insertion	CALR4P	Non syndromic sensorineural hearing loss	PM 22037309
	1 52080553 52096758	na	na	Insertion or deletion	OSBPL9	Non syndromic sensorineural hearing loss	PM 18451855
	1 52082341 52086718	na	na	Insertion or deletion	OSBPL9	Non syndromic sensorineural hearing loss	PM 18451855
	1 52114612 52114712	na	na	Insertion	OSBPL9	Non syndromic sensorineural hearing loss	PM 22037309
	1 52332996 52333096	na	na	Insertion	NRD1	Non syndromic sensorineural hearing loss	PM 22037309
	1 52414178 52414217	na	na	Insertion	RAB3B	Non syndromic sensorineural hearing loss	PM 22037309
	1 52501757 52502158	na	na	Cn gain	TXNDC12	Non syndromic sensorineural hearing loss	PM 19587683
	1 52527279 52527326	na	na	Insertion	BTF3L4	Non syndromic sensorineural hearing loss	PM 22037309
	1 52611088 52642719	na	na	Copy number	ZFYVE9	Non syndromic sensorineural hearing loss	PM 19197067
	1 52687874 52687967	na	na	Insertion	ZFYVE9	Non syndromic sensorineural hearing loss	PM 22037309
	1 52825912 52825973	na	na	Insertion	CC2D1B	Non syndromic sensorineural hearing loss	PM 22037309
	1 52869531 52869619	na	na	Insertion	ORC1	Non syndromic sensorineural hearing loss	PM 22037309
	1 52888672 52888746	na	na	Insertion	ZCCHC11	Non syndromic sensorineural hearing loss	PM 22037309
	1 52888999 52889098	na	na	Insertion	ZCCHC11	Non syndromic sensorineural hearing loss	PM 22037309
	1 53018935 53019019	na	na	Insertion	ZCCHC11	Non syndromic sensorineural hearing loss	PM 22037309
	1 53366685 53367536	na	C	Deletion	ECHDC2	Non syndromic sensorineural hearing loss	PM 21293372
	1 53366779 53368162	na	G	Deletion	ECHDC2	Non syndromic sensorineural hearing loss	PM 21293372
	1 53393860 53393960	na	na	Insertion	ECHDC2	Non syndromic sensorineural hearing loss	PM 22037309
	1 53972208 53972277	na	na	Insertion	GLIS1	Non syndromic sensorineural hearing loss	PM 22037309
	1 54140235 54142318	na	T	Deletion	GLIS1	Non syndromic sensorineural hearing loss	PM 21293372
	1 54248000 54248074	na	na	Insertion	NDC1	Non syndromic sensorineural hearing loss	PM 22037309
	1 54475047 54475147	na	na	Insertion	LDLRAD1	Non syndromic sensorineural hearing loss	PM 22037309
	1 54532780 54532840	na	na	Insertion	TCEANC2	Non syndromic sensorineural hearing loss	PM 22037309
	1 54638678 54638778	na	na	Insertion	CYB5RL	Non syndromic sensorineural hearing loss	PM 22037309
	1 54707376 54707445	na	na	Insertion	SSBP3	Non syndromic sensorineural hearing loss	PM 22037309
	1 54736546 54820778	na	na	Gain	SSBP3	early passage human iPS cells	PM 21368824
	1 54783480 54828069	na	na	Insertion or deletion	SSBP3	Non syndromic sensorineural hearing loss	PM 18451855
	1 54861812 54868562	na	C	Deletion	SSBP3	Non syndromic sensorineural hearing loss	PM 21293372
	1 54864861 54868554	na	A	Deletion	SSBP3	Non syndromic sensorineural hearing loss	PM 21293372
	1 55031774 55031863	na	na	Insertion	ACOT11	Non syndromic sensorineural hearing loss	PM 22037309
	1 55060139 55060457	na	C	Deletion	ACOT11	Non syndromic sensorineural hearing loss	PM 21293372
	1 55073583 55078141	na	C	Deletion	ACOT11	Non syndromic sensorineural hearing loss	PM 21293372
	1 55076155 55076244	na	na	Insertion	ACOT11	Non syndromic sensorineural hearing loss	PM 22037309
	1 55106925 55106977	na	A	Deletion	MROH7	Non syndromic sensorineural hearing loss	PM 21293372
	1 55107643 55107733	na	na	Insertion	MROH7	Non syndromic sensorineural hearing loss	PM 22037309
	1 55143977 55144757	na	A	Deletion	MROH7	Non syndromic sensorineural hearing loss	PM 21293372
	1 55176042 55176125	na	na	Insertion	MROH7	Non syndromic sensorineural hearing loss	PM 22037309
	1 55224898 55225133	na	A	Deletion	PARS2	Non syndromic sensorineural hearing loss	PM 21293372
	1 55514225 55514319	na	na	Insertion	PCSK9	Non syndromic sensorineural hearing loss	PM 22037309
	1 56878910 56879055	na	na	Insertion	PPAP2B	Non syndromic sensorineural hearing loss	PM 22037309
	1 56880657 56880757	na	na	Insertion	PPAP2B	Non syndromic sensorineural hearing loss	PM 22037309
	1 56892624 56892724	na	na	Insertion	PPAP2B	Non syndromic sensorineural hearing loss	PM 22037309
	1 56905118 56905218	na	na	Insertion	PPAP2B	Non syndromic sensorineural hearing loss	PM 22037309
	1 56928942 56929042	na	na	Insertion	PPAP2B	Non syndromic sensorineural hearing loss	PM 22037309
	1 56983283 56983383	na	na	Insertion	PPAP2B	Non syndromic sensorineural hearing loss	PM 22037309
	1 56995187 57014121	na	na	Loss	PPAP2B	early passage human iPS cells	PM 21368824
	1 57015195 57015534	na	G	Deletion	PPAP2B	Non syndromic sensorineural hearing loss	PM 21293372
	1 57015674 57041025	na	na	Gain	PPAP2B	early passage human iPS cells	PM 21368824
	1 57132033 57132121	na	na	Insertion	PRKAA2	Non syndromic sensorineural hearing loss	PM 22037309
	1 57194880 57194954	na	na	Insertion	C1orf168	Non syndromic sensorineural hearing loss	PM 22037309
	1 57251724 57272764	na	na	Gain	C1orf168	early passage human iPS cells	PM 21368824
	1 57422793 57422893	na	na	Insertion	C8B	Non syndromic sensorineural hearing loss	PM 22037309
	1 57536930 57537020	na	na	Insertion	DAB1	Non syndromic sensorineural hearing loss	PM 22037309
	1 57550432 57550618	na	C	Deletion	DAB1	Non syndromic sensorineural hearing loss	PM 21293372
	1 57722044 57723474	na	C	Deletion	DAB1	Non syndromic sensorineural hearing loss	PM 21293372
	1 57890986 57892971	na	A	Deletion	DAB1	Non syndromic sensorineural hearing loss	PM 21293372
	1 58115799 58116123	na	A	Deletion	DAB1	Non syndromic sensorineural hearing loss	PM 21293372
	1 58292643 58292743	na	na	Insertion	DAB1	Non syndromic sensorineural hearing loss	PM 22037309
	1 58312773 58312841	na	A	Deletion	DAB1	Non syndromic sensorineural hearing loss	PM 21293372
	1 58419950 58421715	na	A	Deletion	DAB1	Non syndromic sensorineural hearing loss	PM 21293372
	1 58484644 58496032	na	na	Insertion or deletion	DAB1	Non syndromic sensorineural hearing loss	PM 18451855
	1 58516483 58517588	na	na	High copy gain	DAB1	Non syndromic sensorineural hearing loss	PM 19587683
	1 58516497 58517410	na	G	Deletion	DAB1	Non syndromic sensorineural hearing loss	PM 21293372
	1 58531035 58561791	na	na	Insertion or deletion	DAB1	Non syndromic sensorineural hearing loss	PM 18451855
	1 58640948 58691287	na	na	Gain	DAB1	early passage human iPS cells	PM 21368824
	1 58640948 58691537	na	na	Gain	DAB1	early passage human iPS cells	PM 21368824
	1 58655618 58702269	na	na	Gain	DAB1	early passage human iPS cells	PM 21368824
	1 58903528 58937198	na	na	Insertion or deletion	OMA1	Non syndromic sensorineural hearing loss	PM 18451855
	1 58913802 58915189	na	na	Cn loss	OMA1	Non syndromic sensorineural hearing loss	PM 19587683
	1 58927985 58929843	na	na	High copy gain	OMA1	Non syndromic sensorineural hearing loss	PM 19587683
	1 59327368 59327468	na	na	Insertion	LINC01135	Non syndromic sensorineural hearing loss	PM 22037309
	1 59775675 59775775	na	na	Insertion	FGGY	Non syndromic sensorineural hearing loss	PM 22037309
	1 59815718 59820360	na	G	Deletion	FGGY	Non syndromic sensorineural hearing loss	PM 21293372
	1 59819318 59824956	na	T	Deletion	FGGY	Non syndromic sensorineural hearing loss	PM 21293372
	1 59821224 59822225	na	T	Deletion	FGGY	Non syndromic sensorineural hearing loss	PM 21293372
	1 59878705 59879763	na	na	High copy gain	FGGY	Non syndromic sensorineural hearing loss	PM 19587683
	1 59878832 59879683	na	A	Deletion	FGGY	Non syndromic sensorineural hearing loss	PM 21293372
	1 60081647 60085454	na	na	Cn loss	FGGY	Non syndromic sensorineural hearing loss	PM 19587683
	1 60283431 60283522	na	na	Insertion	HOOK1	Non syndromic sensorineural hearing loss	PM 22037309
	1 60470595 60470794	na	na	Insertion	C1orf87	Non syndromic sensorineural hearing loss	PM 22037309
	1 61207276 61207376	na	na	Insertion	LOC101926964	Non syndromic sensorineural hearing loss	PM 22037309
	1 61228580 61228653	na	na	Insertion	LOC101926964	Non syndromic sensorineural hearing loss	PM 22037309
	1 61552851 61552951	na	na	Insertion	NFIA	Non syndromic sensorineural hearing loss	PM 22037309
	1 61653274 61906852	na	na	Gain	NFIA	Autism	PM 20531469
	1 61765587 61798449	na	na	Insertion or deletion	NFIA	Non syndromic sensorineural hearing loss	PM 18451855
	1 61853831 61856325	na	na	High copy gain	NFIA	Non syndromic sensorineural hearing loss	PM 19587683
	1 61855445 61856289	na	A	Deletion	NFIA	Non syndromic sensorineural hearing loss	PM 21293372
	1 61884829 61892114	na	na	Cn loss	NFIA	Non syndromic sensorineural hearing loss	PM 19587683
	1 61884828 61892114	na	C	Deletion	NFIA	Non syndromic sensorineural hearing loss	PM 19587683
	1 61886001 61892107	na	T	Deletion	NFIA	Non syndromic sensorineural hearing loss	PM 21293372
	1 62163174 62163523	na	G	Deletion	TM2D1	Non syndromic sensorineural hearing loss	PM 21293372
	1 62307205 62307285	na	na	Insertion	INADL	Non syndromic sensorineural hearing loss	PM 22037309
	1 62425508 62430564	na	na	High copy gain	INADL	Non syndromic sensorineural hearing loss	PM 19587683
	1 62427325 62429743	na	T	Deletion	INADL	Non syndromic sensorineural hearing loss	PM 21293372
	1 62907387 62907487	na	na	Insertion	USP1	Non syndromic sensorineural hearing loss	PM 22037309
	1 62924397 62924736	na	T	Deletion	DOCK7	Non syndromic sensorineural hearing loss	PM 21293372
	1 62924407 62924746	na	T	Deletion	DOCK7	Non syndromic sensorineural hearing loss	PM 21293372
	1 62925932 62926940	na	na	Loss	DOCK7	Autism	PM 21865298
	1 62932440 62932523	na	A	Deletion	DOCK7	Non syndromic sensorineural hearing loss	PM 21293372
	1 62980541 62980641	na	na	Insertion	DOCK7	Non syndromic sensorineural hearing loss	PM 22037309
	1 63086239 63120758	na	na	Insertion or deletion	DOCK7	Non syndromic sensorineural hearing loss	PM 18451855
	1 63605886 63675466	na	na	Copy number	LINC00466	Autism	PM 22495311
	1 63629337 63629487	na	na	Insertion	LINC00466	Non syndromic sensorineural hearing loss	PM 22037309
	1 63748722 63779246	na	na	Insertion or deletion	LINC00466	Non syndromic sensorineural hearing loss	PM 18451855
	1 63914296 63940082	na	na	Gain	ITGB3BP	early passage human iPS cells	PM 21368824
	1 63934113 63946072	na	na	Gain	ITGB3BP	early passage human iPS cells	PM 21368824
	1 64085438 64085538	na	na	Insertion	PGM1	Non syndromic sensorineural hearing loss	PM 22037309
	1 64257644 64257744	na	na	Insertion	ROR1	Non syndromic sensorineural hearing loss	PM 22037309
	1 64389169 64488417	na	na	Loss	ROR1	Non syndromic sensorineural hearing loss	PM 17122850
	1 64473482 64486353	na	na	Gain	ROR1	early passage human iPS cells	PM 21368824
	1 64532975 64558427	na	na	Gain	ROR1	early passage human iPS cells	PM 21368824
	1 64545374 64558427	na	na	Gain	ROR1	early passage human iPS cells	PM 21368824
	1 64686153 64723783	na	na	Gain	UBE2U	early passage human iPS cells	PM 21368824
	1 64700722 64700754	na	na	Insertion	UBE2U	Non syndromic sensorineural hearing loss	PM 22037309
	1 64716204 64730649	na	A	Deletion	UBE2U	Non syndromic sensorineural hearing loss	PM 21293372
	1 64955414 64971276	na	na	Gain	CACHD1	early passage human iPS cells	PM 21368824
	1 64955414 64973367	na	na	Gain	CACHD1	early passage human iPS cells	PM 21368824
	1 64969043 64969143	na	na	Insertion	CACHD1	Non syndromic sensorineural hearing loss	PM 22037309
	1 64972919 64973016	na	T	Deletion	CACHD1	Non syndromic sensorineural hearing loss	PM 21293372
	1 65078465 65123432	na	na	Gain	CACHD1	early passage human iPS cells	PM 21368824
	1 65230656 65230745	na	na	Insertion	RAVER2	Non syndromic sensorineural hearing loss	PM 22037309
	1 65376661 65376743	na	na	Insertion	JAK1	Non syndromic sensorineural hearing loss	PM 22037309
	1 65454818 65455182	na	G	Deletion	LINC01359	Non syndromic sensorineural hearing loss	PM 21293372
	1 65624723 65669591	na	na	Insertion or deletion	AK4	Non syndromic sensorineural hearing loss	PM 18451855
	1 65682210 65682480	na	G	Deletion	AK4	Non syndromic sensorineural hearing loss	PM 21293372
	1 65796760 65802871	na	A	Deletion	DNAJC6	Non syndromic sensorineural hearing loss	PM 21293372
	1 65796761 65802855	na	T	Deletion	DNAJC6	Non syndromic sensorineural hearing loss	PM 21293372
	1 65813527 65816490	na	A	Deletion	DNAJC6	Non syndromic sensorineural hearing loss	PM 21293372
	1 65825934 65826034	na	na	Insertion	DNAJC6	Non syndromic sensorineural hearing loss	PM 22037309
	1 65828529 65851742	na	G	Deletion	DNAJC6	Non syndromic sensorineural hearing loss	PM 21293372
	1 65850834 65850993	na	G	Deletion	DNAJC6	Non syndromic sensorineural hearing loss	PM 21293372
	1 65851741 65852015	na	A	Deletion	DNAJC6	Non syndromic sensorineural hearing loss	PM 21293372
	1 65851742 65852019	na	A	Deletion	DNAJC6	Non syndromic sensorineural hearing loss	PM 21293372
	1 65872786 65873068	na	na	Cn loss	DNAJC6	Non syndromic sensorineural hearing loss	PM 19587683
	1 65908300 65908631	na	A	Deletion	LEPROT	Non syndromic sensorineural hearing loss	PM 21293372
	1 66055740 66055939	na	na	Insertion	LEPROT	Non syndromic sensorineural hearing loss	PM 22037309
	1 66286674 66286760	na	na	Insertion	PDE4B	Non syndromic sensorineural hearing loss	PM 22037309
	1 66414001 66436641	na	na	Insertion or deletion	PDE4B	Non syndromic sensorineural hearing loss	PM 18451855
	1 66557267 66646247	na	na	Copy number	PDE4B	Bipolar disorder	PM 19214233
	1 66729316 66745224	na	na	Insertion or deletion	PDE4B	Non syndromic sensorineural hearing loss	PM 18451855
	1 67008163 67008263	na	na	Insertion	SGIP1	Non syndromic sensorineural hearing loss	PM 22037309
	1 67094249 67096885	na	C	Deletion	SGIP1	Non syndromic sensorineural hearing loss	PM 21293372
	1 67351961 67352061	na	na	Insertion	WDR78	Non syndromic sensorineural hearing loss	PM 22037309
	1 67465825 67465925	na	na	Insertion	SLC35D1	Non syndromic sensorineural hearing loss	PM 22037309
	1 67615660 67627885	na	na	Loss	IL23R	early passage human iPS cells	PM 21368824
	1 67705726 67705826	na	na	Insertion	IL23R	Non syndromic sensorineural hearing loss	PM 22037309
	1 67761400 67761500	na	na	Insertion	IL12RB2	Non syndromic sensorineural hearing loss	PM 22037309
	1 67780546 67781404	na	T	Deletion	IL12RB2	Non syndromic sensorineural hearing loss	PM 21293372
	1 67840639 67840739	na	na	Insertion	IL12RB2	Non syndromic sensorineural hearing loss	PM 22037309
	1 68183827 68183922	na	na	Insertion	GNG12	Non syndromic sensorineural hearing loss	PM 22037309
	1 68315432 68315532	na	na	Insertion	GNG12 AS1	Non syndromic sensorineural hearing loss	PM 22037309
	1 68330089 68330223	na	na	Insertion	GNG12 AS1	Non syndromic sensorineural hearing loss	PM 22037309
	1 68336738 68470841	na	na	Amplification	GNG12 AS1	Intellectual disability	PM 21811512
	1 68346947 68347037	na	na	Insertion	GNG12 AS1	Non syndromic sensorineural hearing loss	PM 22037309
	1 68351318 68351418	na	na	Insertion	GNG12 AS1	Non syndromic sensorineural hearing loss	PM 22037309
	1 68367113 68367311	na	C	Deletion	GNG12 AS1	Non syndromic sensorineural hearing loss	PM 21293372
	1 68379469 68427455	na	na	Gain	GNG12 AS1	early passage human iPS cells	PM 21368824
	1 68394851 68394951	na	na	Insertion	GNG12 AS1	Non syndromic sensorineural hearing loss	PM 22037309
	1 68428799 68428899	na	na	Insertion	GNG12 AS1	Non syndromic sensorineural hearing loss	PM 22037309
	1 68462001 68494556	na	na	Gain	GNG12 AS1	early passage human iPS cells	PM 21368824
	1 68518519 68518619	na	na	Insertion	GNG12 AS1	Non syndromic sensorineural hearing loss	PM 22037309
	1 68571266 68571345	na	na	Insertion	GNG12 AS1	Non syndromic sensorineural hearing loss	PM 22037309
	1 68624694 68630253	na	A	Deletion	GNG12 AS1	Non syndromic sensorineural hearing loss	PM 21293372
	1 68661038 68661101	na	C	Deletion	GNG12 AS1	Non syndromic sensorineural hearing loss	PM 21293372
	1 68898883 68898983	na	na	Insertion	RPE65	Non syndromic sensorineural hearing loss	PM 22037309
	1 70090957 70091046	na	na	Insertion	LRRC7	Non syndromic sensorineural hearing loss	PM 22037309
	1 70091070 70091261	na	na	Insertion	LRRC7	Non syndromic sensorineural hearing loss	PM 22037309
	1 70093371 70093552	na	na	Insertion	LRRC7	Non syndromic sensorineural hearing loss	PM 22037309
	1 70093548 70093738	na	na	Insertion	LRRC7	Non syndromic sensorineural hearing loss	PM 22037309
	1 70205705 70205805	na	na	Insertion	LRRC7	Non syndromic sensorineural hearing loss	PM 22037309
	1 70212740 70212840	na	na	Insertion	LRRC7	Non syndromic sensorineural hearing loss	PM 22037309
	1 70219028 70219128	na	na	Insertion	LRRC7	Non syndromic sensorineural hearing loss	PM 22037309
	1 70283792 70283890	na	na	Insertion	LRRC7	Non syndromic sensorineural hearing loss	PM 22037309
	1 70377190 70409021	na	na	Insertion or deletion	LRRC7	Non syndromic sensorineural hearing loss	PM 18451855
	1 70420800 70422802	na	T	Deletion	LRRC7	Non syndromic sensorineural hearing loss	PM 21293372
	1 70540699 70541022	na	T	Deletion	LRRC7	Non syndromic sensorineural hearing loss	PM 21293372
	1 70649465 70649565	na	na	Insertion	LRRC40	Non syndromic sensorineural hearing loss	PM 22037309
	1 70701043 70701138	na	na	Insertion	SRSF11	Non syndromic sensorineural hearing loss	PM 22037309
	1 70718777 70719108	na	A	Deletion	SRSF11	Non syndromic sensorineural hearing loss	PM 21293372
	1 70768425 70768525	na	na	Insertion	ANKRD13C	Non syndromic sensorineural hearing loss	PM 22037309
	1 71211429 71211461	na	na	Insertion	LOC101927244	Non syndromic sensorineural hearing loss	PM 22037309
	1 71401364 71441494	na	na	Loss	PTGER3	Schizophrenia	PM 23813976
	1 71513907 71514217	na	A	Deletion	PTGER3	Non syndromic sensorineural hearing loss	PM 21293372
	1 71550546 71550598	na	C	Deletion	ZRANB2 AS2	Non syndromic sensorineural hearing loss	PM 21293372
	1 71556249 71556349	na	na	Insertion	ZRANB2 AS2	Non syndromic sensorineural hearing loss	PM 22037309
	1 71565175 71565275	na	na	Insertion	ZRANB2 AS2	Non syndromic sensorineural hearing loss	PM 22037309
	1 71601048 71601460	na	T	Deletion	ZRANB2 AS2	Non syndromic sensorineural hearing loss	PM 21293372
	1 71926328 71926377	na	na	Insertion	NEGR1	Non syndromic sensorineural hearing loss	PM 22037309
	1 72039999 72150000	na	C	Deletion	NEGR1	Epilepsy	PM 20502679
	1 72143185 72187543	na	na	Insertion or deletion	NEGR1	Non syndromic sensorineural hearing loss	PM 18451855
	1 72222208 72222619	na	T	Deletion	NEGR1	Non syndromic sensorineural hearing loss	PM 21293372
	1 72258884 72374107	na	na	Loss	NEGR1	Williams Syndrome	PM 20824207
	1 72317292 72328395	na	na	Duplication	NEGR1	Attention deficit hyperactivity disorder	PM 22138692
	1 72389150 72578706	na	na	Copy number	NEGR1	Recurrent pregnancy loss	PM 19789632
	1 72454417 72598834	na	na	Duplication	NEGR1	Non syndromic sensorineural hearing loss	PM 17122850|17289997
	1 72454417 72598834	na	na	Loss	NEGR1	Non syndromic sensorineural hearing loss	PM 17122850|17289997
	1 72463446 72598834	na	na	Gain	NEGR1	Non syndromic sensorineural hearing loss	PM 17122850
	1 72463446 72598834	na	na	Loss	NEGR1	Non syndromic sensorineural hearing loss	PM 17122850
	1 72465474 72478194	na	na	Insertion or deletion	NEGR1	Non syndromic sensorineural hearing loss	PM 18451855
	1 72474649 72531566	na	na	Insertion or deletion	NEGR1	Non syndromic sensorineural hearing loss	PM 18451855
	1 72474676 72534115	na	na	Insertion or deletion	NEGR1	Non syndromic sensorineural hearing loss	PM 18451855
	1 72475787 72528255	na	na	Insertion or deletion	NEGR1	Non syndromic sensorineural hearing loss	PM 18451855
	1 72476416 72535407	na	na	Insertion or deletion	NEGR1	Non syndromic sensorineural hearing loss	PM 18451855
	1 72512661 72571186	na	na	Gain	NEGR1	early passage human iPS cells	PM 21368824
	1 72515499 72624172	na	A	Deletion	NEGR1	Non syndromic sensorineural hearing loss	PM 21293372
	1 72519109 72547710	na	na	Gain	NEGR1	early passage human iPS cells	PM 21368824
	1 72519109 72556524	na	na	Gain	NEGR1	early passage human iPS cells	PM 21368824
	1 72519109 72583724	na	na	Gain	NEGR1	early passage human iPS cells	PM 21368824
	1 72519109 72584492	na	na	Gain	NEGR1	early passage human iPS cells	PM 21368824
	1 72519109 72595412	na	na	Gain	NEGR1	early passage human iPS cells	PM 21368824
	1 72522436 72541492	na	na	Gain	NEGR1	early passage human iPS cells	PM 21368824
	1 72522436 72547710	na	na	Gain	NEGR1	early passage human iPS cells	PM 21368824
	1 72522436 72551667	na	na	Gain	NEGR1	early passage human iPS cells	PM 21368824
	1 72522436 72556524	na	na	Gain	NEGR1	early passage human iPS cells	PM 21368824
	1 72522436 72583724	na	na	Gain	NEGR1	early passage human iPS cells	PM 21368824
	1 72522436 72584492	na	na	Gain	NEGR1	early passage human iPS cells	PM 21368824
	1 72522436 72585028	na	na	Gain	NEGR1	early passage human iPS cells	PM 21368824
	1 72522436 72595412	na	na	Gain	NEGR1	early passage human iPS cells	PM 21368824
	1 72527932 72528080	na	C	Deletion	NEGR1	Non syndromic sensorineural hearing loss	PM 21293372
	1 72527958 72536624	na	C	Deletion	NEGR1	Non syndromic sensorineural hearing loss	PM 21293372
	1 72528280 72536662	na	T	Deletion	NEGR1	Non syndromic sensorineural hearing loss	PM 21293372
	1 72528689 72584492	na	na	Gain	NEGR1	early passage human iPS cells	PM 21368824
	1 72528689 72589597	na	na	Gain	NEGR1	early passage human iPS cells	PM 21368824
	1 72533432 72584492	na	na	Gain	NEGR1	early passage human iPS cells	PM 21368824
	1 72538802 72584603	na	A	Deletion	NEGR1	Non syndromic sensorineural hearing loss	PM 19587683
	1 72538803 72584603	na	na	Homozygous copy loss	NEGR1	Non syndromic sensorineural hearing loss	PM 19587683
	1 72538911 72584427	na	C	Deletion	NEGR1	Non syndromic sensorineural hearing loss	PM 21293372
	1 72538943 72579511	na	na	Copy number	NEGR1	Incontinentia Pigmenti	PM 22033527
	1 72541074 72583749	na	na	Copy number	NEGR1	Obesity	PM 21131291
	1 72541074 72584492	na	na	Gain	NEGR1	early passage human iPS cells	PM 21368824
	1 72541074 72584492	na	na	Loss	NEGR1	early passage human iPS cells	PM 21368824
	1 72541492 72581344	na	na	Gain	NEGR1	early passage human iPS cells	PM 21368824
	1 72541492 72583724	na	na	Loss	NEGR1	early passage human iPS cells	PM 21368824
	1 72541492 72584492	na	na	Gain	NEGR1	early passage human iPS cells	PM 21368824
	1 72541512 72551850	na	na	Gain	NEGR1	early passage human iPS cells	PM 21368824
	1 72541512 72585028	na	na	Loss	NEGR1	early passage human iPS cells	PM 21368824
	1 72543719 72583724	na	na	Loss	NEGR1	early passage human iPS cells	PM 21368824
	1 72543719 72585028	na	na	Loss	NEGR1	early passage human iPS cells	PM 21368824
	1 72543719 72589343	na	na	Loss	NEGR1	early passage human iPS cells	PM 21368824
	1 72561301 72583724	na	na	Gain	NEGR1	early passage human iPS cells	PM 21368824
	1 72561301 72584492	na	na	Gain	NEGR1	early passage human iPS cells	PM 21368824
	1 72561301 72591466	na	na	Gain	NEGR1	early passage human iPS cells	PM 21368824
	1 72617420 72698482	na	na	Gain	NEGR1	early passage human iPS cells	PM 21368824
	1 74527756 74527877	na	T	Deletion	LRRIQ3	Non syndromic sensorineural hearing loss	PM 21293372
	1 74527758 74527879	na	A	Deletion	LRRIQ3	Non syndromic sensorineural hearing loss	PM 21293372
	1 74540836 74540922	na	na	Insertion	LRRIQ3	Non syndromic sensorineural hearing loss	PM 22037309
	1 74607839 74608533	na	na	Cn loss	LRRIQ3	Non syndromic sensorineural hearing loss	PM 19587683
	1 74734094 74734194	na	na	Insertion	FPGT TNNI3K	Non syndromic sensorineural hearing loss	PM 22037309
	1 74757107 74757841	na	A	Deletion	FPGT TNNI3K	Non syndromic sensorineural hearing loss	PM 21293372
	1 74907657 74910313	na	na	Insertion or deletion	FPGT TNNI3K	Non syndromic sensorineural hearing loss	PM 18451855
	1 74920823 74920880	na	C	Deletion	FPGT TNNI3K	Non syndromic sensorineural hearing loss	PM 21293372
	1 75044393 75044425	na	na	Insertion	ERICH3	Non syndromic sensorineural hearing loss	PM 22037309
	1 75217756 75217846	na	na	Insertion	TYW3	Non syndromic sensorineural hearing loss	PM 22037309
	1 75600232 75600278	na	na	Insertion	LHX8	Non syndromic sensorineural hearing loss	PM 22037309
	1 75615355 75621732	na	C	Deletion	LHX8	Non syndromic sensorineural hearing loss	PM 21293372
	1 75698925 75899769	na	na	Loss	SLC44A5	Non syndromic sensorineural hearing loss	PM 17122850
	1 75784453 75784783	na	G	Deletion	SLC44A5	Non syndromic sensorineural hearing loss	PM 21293372
	1 75804595 75804695	na	na	Insertion	SLC44A5	Non syndromic sensorineural hearing loss	PM 22037309
	1 75906536 75907584	na	A	Deletion	SLC44A5	Non syndromic sensorineural hearing loss	PM 21293372
	1 75992978 76011499	na	na	Insertion or deletion	SLC44A5	Non syndromic sensorineural hearing loss	PM 18451855
	1 76082877 76082977	na	na	Insertion	SLC44A5	Non syndromic sensorineural hearing loss	PM 22037309
	1 76299643 76344656	na	na	Insertion or deletion	MSH4	Non syndromic sensorineural hearing loss	PM 18451855
	1 76392743 76392962	na	na	Insertion	ASB17	Non syndromic sensorineural hearing loss	PM 22037309
	1 76541307 76541385	na	G	Deletion	ST6GALNAC3	Non syndromic sensorineural hearing loss	PM 21293372
	1 76774618 76774747	na	na	Insertion	ST6GALNAC3	Non syndromic sensorineural hearing loss	PM 22037309
	1 76872954 76873237	na	T	Deletion	ST6GALNAC3	Non syndromic sensorineural hearing loss	PM 21293372
	1 77012650 77012726	na	A	Deletion	ST6GALNAC3	Non syndromic sensorineural hearing loss	PM 21293372
	1 77016641 77050894	na	na	Insertion or deletion	ST6GALNAC3	Non syndromic sensorineural hearing loss	PM 18451855
	1 77337687 77337787	na	na	Insertion	ST6GALNAC5	Non syndromic sensorineural hearing loss	PM 22037309
	1 77608646 77608746	na	na	Insertion	PIGK	Non syndromic sensorineural hearing loss	PM 22037309
	1 77764824 77764995	na	na	Insertion	AK5	Non syndromic sensorineural hearing loss	PM 22037309
	1 78076767 78076867	na	na	Insertion	ZZZ3	Non syndromic sensorineural hearing loss	PM 22037309
	1 78299764 78299864	na	na	Insertion	FAM73A	Non syndromic sensorineural hearing loss	PM 22037309
	1 78360512 78372993	na	na	Insertion or deletion	NEXN	Non syndromic sensorineural hearing loss	PM 18451855
	1 78383897 78383997	na	na	Insertion	NEXN	Non syndromic sensorineural hearing loss	PM 22037309
	1 78411879 78411979	na	na	Insertion	NEXN	Non syndromic sensorineural hearing loss	PM 22037309
	1 78421766 78424207	na	T	Deletion	FUBP1	Non syndromic sensorineural hearing loss	PM 21293372
	1 78421855 78432177	na	na	Cn loss	FUBP1	Non syndromic sensorineural hearing loss	PM 19587683
	1 78520447 78520509	na	A	Deletion	GIPC2	Non syndromic sensorineural hearing loss	PM 21293372
	1 78702533 78702625	na	na	Insertion	MGC27382	Non syndromic sensorineural hearing loss	PM 22037309
	1 78725332 78770596	na	na	Insertion or deletion	MGC27382	Non syndromic sensorineural hearing loss	PM 18451855
	1 79443633 79462037	na	na	Gain	ELTD1	early passage human iPS cells	PM 21368824
	1 79992230 79993855	na	A	Deletion	ADH5P2	Non syndromic sensorineural hearing loss	PM 21293372
	1 79992525 79995969	na	T	Deletion	ADH5P2	Non syndromic sensorineural hearing loss	PM 21293372
	1 79994368 79995628	na	C	Deletion	ADH5P2	Non syndromic sensorineural hearing loss	PM 21293372
	1 79997019 79997051	na	na	Insertion	ADH5P2	Non syndromic sensorineural hearing loss	PM 22037309
	1 80011207 80011239	na	na	Insertion	ADH5P2	Non syndromic sensorineural hearing loss	PM 22037309
	1 80111169 80111269	na	na	Insertion	ADH5P2	Non syndromic sensorineural hearing loss	PM 22037309
	1 80170216 80170316	na	na	Insertion	ADH5P2	Non syndromic sensorineural hearing loss	PM 22037309
	1 80180570 80180670	na	na	Insertion	ADH5P2	Non syndromic sensorineural hearing loss	PM 22037309
	1 80182302 80182452	na	na	Insertion	ADH5P2	Non syndromic sensorineural hearing loss	PM 22037309
	1 80202769 80202869	na	na	Insertion	ADH5P2	Non syndromic sensorineural hearing loss	PM 22037309
	1 80224993 80236635	na	na	Loss	ADH5P2	early passage human iPS cells	PM 21368824
	1 81981139 81981239	na	na	Insertion	LOC101927434	Non syndromic sensorineural hearing loss	PM 22037309
	1 82311852 82312018	na	na	Insertion	LPHN2	Non syndromic sensorineural hearing loss	PM 22037309
	1 83362009 83362109	na	na	Insertion	LINC01361	Non syndromic sensorineural hearing loss	PM 22037309
	1 83384201 83384301	na	na	Insertion	LINC01361	Non syndromic sensorineural hearing loss	PM 22037309
	1 83392406 83426597	na	na	Insertion or deletion	LINC01361	Non syndromic sensorineural hearing loss	PM 18451855
	1 84044490 84044621	na	T	Deletion	LOC101927587	Non syndromic sensorineural hearing loss	PM 21293372
	1 84160928 84161547	na	T	Deletion	LOC101927587	Non syndromic sensorineural hearing loss	PM 21293372
	1 84166539 84166622	na	na	Insertion	LOC101927587	Non syndromic sensorineural hearing loss	PM 22037309
	1 84206533 84206612	na	na	Insertion	LOC101927587	Non syndromic sensorineural hearing loss	PM 22037309
	1 84211119 84242107	na	na	Insertion or deletion	LOC101927587	Non syndromic sensorineural hearing loss	PM 18451855
	1 84220136 84240135	na	na	Insertion or deletion	LOC101927587	Non syndromic sensorineural hearing loss	PM 18451855
	1 84221132 84256656	na	na	Insertion or deletion	LOC101927587	Non syndromic sensorineural hearing loss	PM 18451855
	1 84225657 84245319	na	na	Insertion or deletion	LOC101927587	Non syndromic sensorineural hearing loss	PM 18451855
	1 84228222 84238783	na	na	Insertion or deletion	LOC101927587	Non syndromic sensorineural hearing loss	PM 18451855
	1 84229410 84239699	na	na	Insertion or deletion	LOC101927587	Non syndromic sensorineural hearing loss	PM 18451855
	1 84274266 84274335	na	na	Insertion	LOC101927587	Non syndromic sensorineural hearing loss	PM 22037309
	1 84290513 84297217	na	T	Deletion	LOC101927587	Non syndromic sensorineural hearing loss	PM 21293372
	1 84302130 84302230	na	na	Insertion	LOC101927587	Non syndromic sensorineural hearing loss	PM 22037309
	1 84311988 84312088	na	na	Insertion	LOC101927587	Non syndromic sensorineural hearing loss	PM 22037309
	1 84315970 84316040	na	na	Insertion	LOC101927587	Non syndromic sensorineural hearing loss	PM 22037309
	1 84360394 84360494	na	na	Insertion	TTLL7	Non syndromic sensorineural hearing loss	PM 22037309
	1 84549677 84549766	na	na	Insertion	PRKACB	Non syndromic sensorineural hearing loss	PM 22037309
	1 84655560 84657326	na	T	Deletion	PRKACB	Non syndromic sensorineural hearing loss	PM 21293372
	1 84959713 84960056	na	A	Deletion	RPF1	Non syndromic sensorineural hearing loss	PM 21293372
	1 85037506 85037604	na	na	Insertion	CTBS	Non syndromic sensorineural hearing loss	PM 22037309
	1 85137798 85137898	na	na	Insertion	SSX2IP	Non syndromic sensorineural hearing loss	PM 22037309
	1 85279907 85279987	na	na	Insertion	LPAR3	Non syndromic sensorineural hearing loss	PM 22037309
	1 85398709 85398809	na	na	Insertion	MCOLN2	Non syndromic sensorineural hearing loss	PM 22037309
	1 85588551 85588651	na	na	Insertion	WDR63	Non syndromic sensorineural hearing loss	PM 22037309
	1 85784439 85784539	na	na	Insertion	DDAH1	Non syndromic sensorineural hearing loss	PM 22037309
	1 86121412 86121512	na	na	Insertion	ZNHIT6	Non syndromic sensorineural hearing loss	PM 22037309
	1 86453313 86455611	na	G	Deletion	COL24A1	Non syndromic sensorineural hearing loss	PM 21293372
	1 86486330 86486430	na	na	Insertion	COL24A1	Non syndromic sensorineural hearing loss	PM 22037309
	1 86513568 86514285	na	A	Deletion	COL24A1	Non syndromic sensorineural hearing loss	PM 21293372
	1 86594215 86595786	na	G	Deletion	COL24A1	Non syndromic sensorineural hearing loss	PM 21293372
	1 86867892 86867981	na	na	Insertion	LOC100420166	Non syndromic sensorineural hearing loss	PM 22037309
	1 87214191 87214271	na	na	Insertion	SH3GLB1	Non syndromic sensorineural hearing loss	PM 22037309
	1 87386259 87386359	na	na	Insertion	HS2ST1	Non syndromic sensorineural hearing loss	PM 22037309
	1 87469017 87500335	na	na	Insertion or deletion	HS2ST1	Non syndromic sensorineural hearing loss	PM 18451855
	1 87599665 87599743	na	na	Insertion	LINC01140	Non syndromic sensorineural hearing loss	PM 22037309
	1 87610610 87634021	na	na	Duplication	LINC01140	Non syndromic sensorineural hearing loss	PM 19212409
	1 87819719 87819825	na	A	Deletion	LINC01364	Non syndromic sensorineural hearing loss	PM 21293372
	1 88219246 88219336	na	na	Insertion	LOC101927871	Non syndromic sensorineural hearing loss	PM 22037309
	1 88807314 88807414	na	na	Insertion	PKN2 AS1	Non syndromic sensorineural hearing loss	PM 22037309
	1 88818315 88818415	na	na	Insertion	PKN2 AS1	Non syndromic sensorineural hearing loss	PM 22037309
	1 88867106 88867928	na	G	Deletion	PKN2 AS1	Non syndromic sensorineural hearing loss	PM 21293372
	1 88968668 88968742	na	na	Insertion	PKN2 AS1	Non syndromic sensorineural hearing loss	PM 22037309
	1 89083272 89083363	na	na	Insertion	PKN2 AS1	Non syndromic sensorineural hearing loss	PM 22037309
	1 89218349 89218381	na	na	Insertion	PKN2	Non syndromic sensorineural hearing loss	PM 22037309
	1 89248496 89251212	na	A	Deletion	PKN2	Non syndromic sensorineural hearing loss	PM 21293372
	1 89248672 89251662	na	na	High copy gain	PKN2	Non syndromic sensorineural hearing loss	PM 19587683
	1 89249006 89251114	na	A	Deletion	PKN2	Non syndromic sensorineural hearing loss	PM 21293372
	1 89249015 89262858	na	na	Gain	PKN2	early passage human iPS cells	PM 21368824
	1 89297241 89297625	na	na	Loss	PKN2	Autism	PM 21865298
	1 89403932 89403984	na	na	Insertion	CCBL2	Non syndromic sensorineural hearing loss	PM 22037309
	1 89584005 89584870	na	A	Deletion	GBP2	Non syndromic sensorineural hearing loss	PM 21293372
	1 89612473 89612573	na	na	Insertion	GBP7	Non syndromic sensorineural hearing loss	PM 22037309
	1 89658427 89658527	na	na	Insertion	GBP4	Non syndromic sensorineural hearing loss	PM 22037309
	1 90014501 90014559	na	G	Deletion	LRRC8B	Non syndromic sensorineural hearing loss	PM 21293372
	1 90019778 90019878	na	na	Insertion	LRRC8B	Non syndromic sensorineural hearing loss	PM 22037309
	1 90088503 90088603	na	na	Insertion	FLJ27354	Non syndromic sensorineural hearing loss	PM 22037309
	1 90123412 90164081	na	na	Gain	LRRC8C	early passage human iPS cells	PM 21368824
	1 90308443 90308543	na	na	Insertion	LRRC8D	Non syndromic sensorineural hearing loss	PM 22037309
	1 90472839 90472939	na	na	Insertion	ZNF326	Non syndromic sensorineural hearing loss	PM 22037309
	1 91397335 91397618	na	G	Deletion	ZNF644	Non syndromic sensorineural hearing loss	PM 21293372
	1 91397359 91397642	na	A	Deletion	ZNF644	Non syndromic sensorineural hearing loss	PM 21293372
	1 91426536 91426633	na	na	Insertion	ZNF644	Non syndromic sensorineural hearing loss	PM 22037309
	1 92147585 92147661	na	na	Insertion	TGFBR3	Non syndromic sensorineural hearing loss	PM 22037309
	1 92222832 92253354	na	na	Insertion or deletion	TGFBR3	Non syndromic sensorineural hearing loss	PM 18451855
	1 92351786 92357601	na	T	Deletion	TGFBR3	Non syndromic sensorineural hearing loss	PM 21293372
	1 92453941 92453993	na	A	Deletion	BRDT	Non syndromic sensorineural hearing loss	PM 21293372
	1 92685463 92685548	na	na	Insertion	C1orf146	Non syndromic sensorineural hearing loss	PM 22037309
	1 92740322 92740422	na	na	Insertion	GLMN	Non syndromic sensorineural hearing loss	PM 22037309
	1 92807569 92807601	na	na	Insertion	RPAP2	Non syndromic sensorineural hearing loss	PM 22037309
	1 92942642 92942788	na	na	Gain	GFI1	Autism	PM 21865298
	1 93070181 93080069	na	na	Deleted	EVI5	Diamond Blackfan anemia	PM 22689679
	1 93167521 93167734	na	na	Insertion	EVI5	Non syndromic sensorineural hearing loss	PM 22037309
	1 93427499 93427592	na	na	Insertion	FAM69A	Non syndromic sensorineural hearing loss	PM 22037309
	1 93572036 93572092	na	na	Insertion	MTF2	Non syndromic sensorineural hearing loss	PM 22037309
	1 93783342 93783442	na	na	Insertion	LOC100131564	Non syndromic sensorineural hearing loss	PM 22037309
	1 93849294 93849394	na	na	Insertion	LOC100421273	Non syndromic sensorineural hearing loss	PM 22037309
	1 93955135 93955235	na	na	Insertion	FNBP1L	Non syndromic sensorineural hearing loss	PM 22037309
	1 93959777 94004929	na	na	Insertion or deletion	FNBP1L	Non syndromic sensorineural hearing loss	PM 18451855
	1 94060874 94063950	na	A	Deletion	BCAR3	Non syndromic sensorineural hearing loss	PM 21293372
	1 94060960 94063844	na	A	Deletion	BCAR3	Non syndromic sensorineural hearing loss	PM 21293372
	1 94142496 94142596	na	na	Insertion	BCAR3	Non syndromic sensorineural hearing loss	PM 22037309
	1 94209776 94209876	na	na	Insertion	BCAR3	Non syndromic sensorineural hearing loss	PM 22037309
	1 94230041 94230114	na	na	Insertion	BCAR3	Non syndromic sensorineural hearing loss	PM 22037309
	1 94230221 94230272	na	na	Insertion	BCAR3	Non syndromic sensorineural hearing loss	PM 22037309
	1 94291271 94291325	na	na	Insertion	BCAR3	Non syndromic sensorineural hearing loss	PM 22037309
	1 94518898 94518998	na	na	Insertion	ABCA4	Non syndromic sensorineural hearing loss	PM 22037309
	1 94583086 94583201	na	G	Deletion	ABCA4	Non syndromic sensorineural hearing loss	PM 21293372
	1 94910096 94910196	na	na	Insertion	ABCD3	Non syndromic sensorineural hearing loss	PM 22037309
	1 95115289 95116119	na	T	Deletion	KATNBL1P2	Non syndromic sensorineural hearing loss	PM 21293372
	1 95137482 95137569	na	na	Insertion	PGBD4P7	Non syndromic sensorineural hearing loss	PM 22037309
	1 95183886 95183986	na	na	Insertion	LINC01057	Non syndromic sensorineural hearing loss	PM 22037309
	1 95294847 95298524	na	A	Deletion	SLC44A3	Non syndromic sensorineural hearing loss	PM 21293372
	1 95317709 95317809	na	na	Insertion	SLC44A3	Non syndromic sensorineural hearing loss	PM 22037309
	1 95361718 95361802	na	na	Insertion	SLC44A3	Non syndromic sensorineural hearing loss	PM 22037309
	1 95463098 95463417	na	A	Deletion	ALG14	Non syndromic sensorineural hearing loss	PM 21293372
	1 95502828 95532434	na	na	Insertion or deletion	ALG14	Non syndromic sensorineural hearing loss	PM 18451855
	1 95588159 95588252	na	na	Insertion	TMEM56	Non syndromic sensorineural hearing loss	PM 22037309
	1 96768965 96769803	na	T	Deletion	LOC101928241	Non syndromic sensorineural hearing loss	PM 21293372
	1 96792864 96792964	na	na	Insertion	LOC101928241	Non syndromic sensorineural hearing loss	PM 22037309
	1 96795143 96840107	na	na	Insertion or deletion	LOC101928241	Non syndromic sensorineural hearing loss	PM 18451855
	1 96861306 96861400	na	na	Insertion	LOC101060164	Non syndromic sensorineural hearing loss	PM 22037309
	1 97270358 97270413	na	na	Insertion	PTBP2	Non syndromic sensorineural hearing loss	PM 22037309
	1 97614617 97614707	na	na	Insertion	DPYD	Non syndromic sensorineural hearing loss	PM 22037309
	1 97794409 98009752	na	na	Loss	DPYD	Williams Syndrome	PM 20824207
	1 98282476 98284000	na	na	Cn gain	DPYD	Non syndromic sensorineural hearing loss	PM 19587683
	1 98301040 98320090	na	na	Gain	DPYD	early passage human iPS cells	PM 21368824
	1 98302772 98320090	na	na	Gain	DPYD	early passage human iPS cells	PM 21368824
	1 98387419 98387519	na	na	Insertion	DPYD	Non syndromic sensorineural hearing loss	PM 22037309
	1 98544216 98544311	na	na	Insertion	NFU1P2	Non syndromic sensorineural hearing loss	PM 22037309
	1 99126380 99126470	na	na	Insertion	SNX7	Non syndromic sensorineural hearing loss	PM 22037309
	1 99134366 99134451	na	na	Insertion	SNX7	Non syndromic sensorineural hearing loss	PM 22037309
	1 99392117 99392207	na	na	Insertion	LPPR5	Non syndromic sensorineural hearing loss	PM 22037309
	1 99503319 99548526	na	na	Insertion or deletion	LOC100129620	Non syndromic sensorineural hearing loss	PM 18451855
	1 99763184 99763279	na	na	Insertion	LPPR4	Non syndromic sensorineural hearing loss	PM 22037309
	1 100057466 100057535	na	na	Insertion	PALMD	Non syndromic sensorineural hearing loss	PM 22037309
	1 100076780 100076852	na	T	Deletion	PALMD	Non syndromic sensorineural hearing loss	PM 21293372
	1 100079900 100079985	na	na	Insertion	PALMD	Non syndromic sensorineural hearing loss	PM 22037309
	1 100084206 100084303	na	na	Insertion	PALMD	Non syndromic sensorineural hearing loss	PM 22037309
	1 100201920 100202020	na	na	Insertion	FRRS1	Non syndromic sensorineural hearing loss	PM 22037309
	1 100386051 100386139	na	na	Insertion	AGL	Non syndromic sensorineural hearing loss	PM 22037309
	1 100689596 100689696	na	na	Insertion	DBT	Non syndromic sensorineural hearing loss	PM 22037309
	1 100827531 100827631	na	na	Insertion	CDC14A	Non syndromic sensorineural hearing loss	PM 22037309
	1 100892533 100894939	na	T	Deletion	CDC14A	Non syndromic sensorineural hearing loss	PM 21293372
	1 101345495 101345527	na	na	Insertion	EXTL2	Non syndromic sensorineural hearing loss	PM 22037309
	1 101363152 101363252	na	na	Insertion	EXTL2	Non syndromic sensorineural hearing loss	PM 22037309
	1 101447658 101447808	na	na	Insertion	SLC30A7	Non syndromic sensorineural hearing loss	PM 22037309
	1 101496710 101496786	na	C	Deletion	SLC30A7	Non syndromic sensorineural hearing loss	PM 21293372
	1 101496723 101496799	na	G	Deletion	SLC30A7	Non syndromic sensorineural hearing loss	PM 21293372
	1 101540923 101541023	na	na	Insertion	SLC30A7	Non syndromic sensorineural hearing loss	PM 22037309
	1 102271490 102292075	na	na	Insertion or deletion	OLFM3	Non syndromic sensorineural hearing loss	PM 18451855
	1 102376398 102376498	na	na	Insertion	OLFM3	Non syndromic sensorineural hearing loss	PM 22037309
	1 102380934 102392397	na	na	Loss	OLFM3	early passage human iPS cells	PM 21368824
	1 102380934 102432436	na	na	Loss	OLFM3	early passage human iPS cells	PM 21368824
	1 102381165 102432436	na	na	Loss	OLFM3	early passage human iPS cells	PM 21368824
	1 102446990 102447134	na	A	Deletion	OLFM3	Non syndromic sensorineural hearing loss	PM 21293372
	1 103187323 103187647	na	A	Deletion	COL11A1	Non syndromic sensorineural hearing loss	PM 21293372
	1 103208491 103208591	na	na	Insertion	COL11A1	Non syndromic sensorineural hearing loss	PM 22037309
	1 103430155 103430255	na	na	Insertion	COL11A1	Non syndromic sensorineural hearing loss	PM 22037309
	1 104244722 104245248	na	A	Deletion	AMY1B	Non syndromic sensorineural hearing loss	PM 21293372
	1 104244762 104245258	na	T	Deletion	AMY1B	Non syndromic sensorineural hearing loss	PM 21293372
	1 104295996 104296993	na	A	Deletion	AMY1C	Non syndromic sensorineural hearing loss	PM 21293372
	1 105975935 105976035	na	na	Insertion	CDK4PS	Non syndromic sensorineural hearing loss	PM 22037309
	1 107598998 107599098	na	na	Insertion	PRMT6	Non syndromic sensorineural hearing loss	PM 22037309
	1 107690478 107690578	na	na	Insertion	NTNG1	Non syndromic sensorineural hearing loss	PM 22037309
	1 108142297 108142466	na	na	Insertion	VAV3	Non syndromic sensorineural hearing loss	PM 22037309
	1 108204494 108207007	na	A	Deletion	VAV3	Non syndromic sensorineural hearing loss	PM 21293372
	1 108204506 108206926	na	G	Deletion	VAV3	Non syndromic sensorineural hearing loss	PM 21293372
	1 108424591 108452296	na	na	Insertion or deletion	VAV3	Non syndromic sensorineural hearing loss	PM 18451855
	1 108511895 108511969	na	na	Insertion	VAV3 AS1	Non syndromic sensorineural hearing loss	PM 22037309
	1 108534846 108538814	na	na	High copy gain	VAV3 AS1	Non syndromic sensorineural hearing loss	PM 19587683
	1 108534846 108538775	na	A	Deletion	VAV3 AS1	Non syndromic sensorineural hearing loss	PM 21293372
	1 108534847 108537325	na	G	Deletion	VAV3 AS1	Non syndromic sensorineural hearing loss	PM 21293372
	1 108534847 108538756	na	G	Deletion	VAV3 AS1	Non syndromic sensorineural hearing loss	PM 21293372
	1 108534877 108538928	na	C	Deletion	VAV3 AS1	Non syndromic sensorineural hearing loss	PM 21293372
	1 108701980 108702080	na	na	Insertion	SLC25A24	Non syndromic sensorineural hearing loss	PM 22037309
	1 109374783 109377082	na	T	Deletion	AKNAD1	Non syndromic sensorineural hearing loss	PM 21293372
	1 109381534 109381634	na	na	Insertion	AKNAD1	Non syndromic sensorineural hearing loss	PM 22037309
	1 109466248 109466348	na	na	Insertion	GPSM2	Non syndromic sensorineural hearing loss	PM 22037309
	1 109632385 109632637	na	A	Deletion	TMEM167B	Non syndromic sensorineural hearing loss	PM 21293372
	1 109751071 109751171	na	na	Insertion	KIAA1324	Non syndromic sensorineural hearing loss	PM 22037309
	1 109773484 109773572	na	na	Insertion	SARS	Non syndromic sensorineural hearing loss	PM 22037309
	1 109793404 109793470	na	na	Insertion	CELSR2	Non syndromic sensorineural hearing loss	PM 22037309
	1 109864960 109909965	na	na	Insertion or deletion	SORT1	Non syndromic sensorineural hearing loss	PM 18451855
	1 109890270 109917005	na	na	Insertion or deletion	SORT1	Non syndromic sensorineural hearing loss	PM 18451855
	1 109893302 109910480	na	na	Insertion or deletion	SORT1	Non syndromic sensorineural hearing loss	PM 18451855
	1 109933817 109941498	na	na	Insertion or deletion	SORT1	Non syndromic sensorineural hearing loss	PM 18451855
	1 110007834 110007914	na	na	Insertion	SYPL2	Non syndromic sensorineural hearing loss	PM 22037309
	1 110025099 110025182	na	na	Insertion	SYPL2	Non syndromic sensorineural hearing loss	PM 22037309
	1 110117230 110117329	na	na	Insertion	GNAI3	Non syndromic sensorineural hearing loss	PM 22037309
	1 110121627 110134733	na	na	Gain	GNAI3	early passage human iPS cells	PM 21368824
	1 110165441 110165541	na	na	Insertion	AMPD2	Non syndromic sensorineural hearing loss	PM 22037309
	1 110308544 110308633	na	na	Insertion	EPS8L3	Non syndromic sensorineural hearing loss	PM 22037309
	1 110602804 110602889	na	na	Insertion	ALX3	Non syndromic sensorineural hearing loss	PM 22037309
	1 110832919 110833019	na	na	Insertion	LOC440600	Non syndromic sensorineural hearing loss	PM 22037309
	1 110835098 110835195	na	na	Insertion	LOC440600	Non syndromic sensorineural hearing loss	PM 22037309
	1 110835235 110835335	na	na	Insertion	LOC440600	Non syndromic sensorineural hearing loss	PM 22037309
	1 111025062 111025212	na	na	Insertion	CYMP	Non syndromic sensorineural hearing loss	PM 22037309
	1 111163354 111163454	na	na	Insertion	KCNA2	Non syndromic sensorineural hearing loss	PM 22037309
	1 111219500 111219600	na	na	Insertion	KCNA3	Non syndromic sensorineural hearing loss	PM 22037309
	1 111417807 111417907	na	na	Insertion	CD53	Non syndromic sensorineural hearing loss	PM 22037309
	1 111777127 111784755	na	na	Cn loss	CHI3L2	Non syndromic sensorineural hearing loss	PM 19587683
	1 111781837 111781937	na	na	Insertion	CHI3L2	Non syndromic sensorineural hearing loss	PM 22037309
	1 111876217 111876328	na	T	Deletion	PIFO	Non syndromic sensorineural hearing loss	PM 21293372
	1 111885649 111885749	na	na	Insertion	PIFO	Non syndromic sensorineural hearing loss	PM 22037309
	1 111889078 111889282	na	T	Deletion	PIFO	Non syndromic sensorineural hearing loss	PM 21293372
	1 112027226 112027296	na	na	Insertion	ADORA3	Non syndromic sensorineural hearing loss	PM 22037309
	1 112043784 112068759	na	na	Insertion or deletion	ADORA3	Non syndromic sensorineural hearing loss	PM 18451855
	1 112372962 112373062	na	na	Insertion	KCND3	Non syndromic sensorineural hearing loss	PM 22037309
	1 112397961 112426840	na	na	Insertion or deletion	KCND3	Non syndromic sensorineural hearing loss	PM 18451855
	1 112402144 112423342	na	na	Insertion or deletion	KCND3	Non syndromic sensorineural hearing loss	PM 18451855
	1 112493313 112506226	na	G	Deletion	KCND3	Non syndromic sensorineural hearing loss	PM 21293372
	1 112493656 112506352	na	G	Deletion	KCND3	Non syndromic sensorineural hearing loss	PM 19587683
	1 112493657 112506352	na	na	Homozygous copy loss	KCND3	Non syndromic sensorineural hearing loss	PM 19587683
	1 112494151 112506316	na	G	Deletion	KCND3	Non syndromic sensorineural hearing loss	PM 21293372
	1 112497197 112507629	na	na	Loss	KCND3	early passage human iPS cells	PM 21368824
	1 112497197 112507651	na	na	Loss	KCND3	early passage human iPS cells	PM 21368824
	1 112497197 112507660	na	na	Loss	KCND3	early passage human iPS cells	PM 21368824
	1 112497197 112507709	na	na	Loss	KCND3	early passage human iPS cells	PM 21368824
	1 112497197 112507729	na	na	Loss	KCND3	early passage human iPS cells	PM 21368824
	1 112497199 112498913	na	T	Deletion	KCND3	Non syndromic sensorineural hearing loss	PM 21293372
	1 112497476 112507639	na	na	Loss	KCND3	early passage human iPS cells	PM 21368824
	1 112497704 112507705	na	na	Loss	KCND3	early passage human iPS cells	PM 21368824
	1 112497704 112507709	na	na	Loss	KCND3	early passage human iPS cells	PM 21368824
	1 112497704 112507729	na	na	Loss	KCND3	early passage human iPS cells	PM 21368824
	1 112541774 112541828	na	na	Insertion	LOC643355	Non syndromic sensorineural hearing loss	PM 22037309
	1 112991792 112992011	na	na	Insertion	CTTNBP2NL	Non syndromic sensorineural hearing loss	PM 22037309
	1 113050884 113050924	na	na	Insertion	WNT2B	Non syndromic sensorineural hearing loss	PM 22037309
	1 113093729 113093788	na	na	Insertion	ST7L	Non syndromic sensorineural hearing loss	PM 22037309
	1 113299486 113299586	na	na	Insertion	NUTF2P4	Non syndromic sensorineural hearing loss	PM 22037309
	1 113498740 113498840	na	na	Insertion	SLC16A1	Non syndromic sensorineural hearing loss	PM 22037309
	1 113561419 113561489	na	na	Insertion	LOC100996251	Non syndromic sensorineural hearing loss	PM 22037309
	1 113565925 113566025	na	na	Insertion	LOC100996251	Non syndromic sensorineural hearing loss	PM 22037309
	1 113601151 113601610	na	G	Deletion	LOC100996251	Non syndromic sensorineural hearing loss	PM 21293372
	1 113611197 113611327	na	na	Insertion	LOC100996251	Non syndromic sensorineural hearing loss	PM 22037309
	1 114108389 114108834	na	na	Cn loss	MAGI3	Non syndromic sensorineural hearing loss	PM 19587683
	1 114245635 114247761	na	na	Cn loss	PHTF1	Non syndromic sensorineural hearing loss	PM 19587683
	1 114338791 114338891	na	na	Insertion	RSBN1	Non syndromic sensorineural hearing loss	PM 22037309
	1 114363464 114396077	na	na	Insertion or deletion	PTPN22	Non syndromic sensorineural hearing loss	PM 18451855
	1 114442212 114442312	na	na	Insertion	AP4B1 AS1	Non syndromic sensorineural hearing loss	PM 22037309
	1 114472160 114472205	na	na	Insertion	HIPK1 AS1	Non syndromic sensorineural hearing loss	PM 22037309
	1 114939073 114939163	na	na	Insertion	TRIM33	Non syndromic sensorineural hearing loss	PM 22037309
	1 114981287 114981834	na	C	Deletion	TRIM33	Non syndromic sensorineural hearing loss	PM 21293372
	1 115203823 115203923	na	na	Insertion	DENND2C	Non syndromic sensorineural hearing loss	PM 22037309
	1 115246595 115246958	na	A	Deletion	NRAS	Non syndromic sensorineural hearing loss	PM 21293372
	1 115247078 115259515	na	na	Gain	NRAS	Spitz naevi	PM 22211292
	1 115578125 115578225	na	na	Insertion	TSHB	Non syndromic sensorineural hearing loss	PM 22037309
	1 115598411 115598695	na	A	Deletion	TSPAN2	Non syndromic sensorineural hearing loss	PM 21293372
	1 115619836 115619936	na	na	Insertion	TSPAN2	Non syndromic sensorineural hearing loss	PM 22037309
	1 115768428 115768518	na	na	Insertion	NGF	Non syndromic sensorineural hearing loss	PM 22037309
	1 115838062 115838094	na	na	Insertion	NGF	Non syndromic sensorineural hearing loss	PM 22037309
	1 115895139 115895239	na	na	Insertion	LOC101060172	Non syndromic sensorineural hearing loss	PM 22037309
	1 116183655 116183754	na	na	Insertion	VANGL1	Non syndromic sensorineural hearing loss	PM 22037309
	1 116242978 116243078	na	na	Insertion	CASQ2	Non syndromic sensorineural hearing loss	PM 22037309
	1 116254646 116275005	na	na	Insertion or deletion	CASQ2	Non syndromic sensorineural hearing loss	PM 18451855
	1 116556512 116556612	na	na	Insertion	SLC22A15	Non syndromic sensorineural hearing loss	PM 22037309
	1 116676664 116676764	na	na	Insertion	MAB21L3	Non syndromic sensorineural hearing loss	PM 22037309
	1 117002894 117002994	na	na	Insertion	LOC101929023	Non syndromic sensorineural hearing loss	PM 22037309
	1 117068898 117068930	na	na	Insertion	CD58	Non syndromic sensorineural hearing loss	PM 22037309
	1 117073314 117085788	na	na	Gain	CD58	early passage human iPS cells	PM 21368824
	1 117126088 117171196	na	na	Insertion or deletion	IGSF3	Non syndromic sensorineural hearing loss	PM 18451855
	1 117487947 117520505	na	na	Insertion or deletion	PTGFRN	Non syndromic sensorineural hearing loss	PM 18451855
	1 117568312 117568407	na	na	Insertion	CD101	Non syndromic sensorineural hearing loss	PM 22037309
	1 117592559 117592683	na	na	Insertion	LOC101929099	Non syndromic sensorineural hearing loss	PM 22037309
	1 117661285 117661385	na	na	Insertion	TRIM45	Non syndromic sensorineural hearing loss	PM 22037309
	1 117685357 117714542	na	na	Loss	VTCN1	early passage human iPS cells	PM 21368824
	1 117754060 117754145	na	na	Insertion	VTCN1	Non syndromic sensorineural hearing loss	PM 22037309
	1 117908604 117908704	na	na	Insertion	MAN1A2	Non syndromic sensorineural hearing loss	PM 22037309
	1 117914677 117914770	na	na	Insertion	MAN1A2	Non syndromic sensorineural hearing loss	PM 22037309
	1 117968996 117970228	na	na	Cn gain	MAN1A2	Non syndromic sensorineural hearing loss	PM 19587683
	1 118184513 118184613	na	na	Insertion	LOC401959	Non syndromic sensorineural hearing loss	PM 22037309
	1 118475124 118475224	na	na	Insertion	WDR3	Non syndromic sensorineural hearing loss	PM 22037309
	1 118508243 118508338	na	na	Insertion	SPAG17	Non syndromic sensorineural hearing loss	PM 22037309
	1 118515392 118515972	na	C	Deletion	SPAG17	Non syndromic sensorineural hearing loss	PM 21293372
	1 118632000 118637505	na	na	Insertion or deletion	SPAG17	Non syndromic sensorineural hearing loss	PM 18451855
	1 119428786 119428886	na	na	Insertion	TBX15	Non syndromic sensorineural hearing loss	PM 22037309
	1 119647065 119679790	na	na	Insertion or deletion	WARS2	Non syndromic sensorineural hearing loss	PM 18451855
	1 119656424 119656512	na	na	Insertion	WARS2	Non syndromic sensorineural hearing loss	PM 22037309
	1 119910636 119927963	na	na	Gain	HAO2	early passage human iPS cells	PM 21368824
	1 119910636 119931076	na	na	Gain	HAO2	early passage human iPS cells	PM 21368824
	1 119912022 119931076	na	na	Gain	HAO2	early passage human iPS cells	PM 21368824
	1 119919507 119931076	na	na	Gain	HAO2	early passage human iPS cells	PM 21368824
	1 119965035 119965108	na	T	Deletion	HSD3B2	Non syndromic sensorineural hearing loss	PM 21293372
	1 120080653 120080753	na	na	Insertion	HSD3BP3	Non syndromic sensorineural hearing loss	PM 22037309
	1 120167524 120167607	na	na	Insertion	ZNF697	Non syndromic sensorineural hearing loss	PM 22037309
	1 120265565 120265634	na	na	Insertion	PHGDH	Non syndromic sensorineural hearing loss	PM 22037309
	1 120344113 120344177	na	T	Deletion	REG4	Non syndromic sensorineural hearing loss	PM 21293372
	1 120355848 120355907	na	na	Insertion	REG4	Non syndromic sensorineural hearing loss	PM 22037309
	1 120600563 120634912	na	na	Insertion or deletion	NOTCH2	Non syndromic sensorineural hearing loss	PM 18451855
	1 143912137 143913495	na	G	Deletion	FAM72D	Non syndromic sensorineural hearing loss	PM 21293372
	1 143967113 143967345	na	A	Deletion	SRGAP2B	Non syndromic sensorineural hearing loss	PM 21293372
	1 144003199 144003312	na	T	Deletion	SRGAP2B	Non syndromic sensorineural hearing loss	PM 21293372
	1 144188441 144210448	na	na	Gain	NBPF8	Schizophrenia	PM 19805367
	1 144303961 144322241	na	na	Gain	LINC00623	Schizophrenia	PM 19805367
	1 144869219 144869314	na	na	Insertion	PDE4DIP	Non syndromic sensorineural hearing loss	PM 22037309
	1 144998626 144998729	na	C	Deletion	PDE4DIP	Non syndromic sensorineural hearing loss	PM 21293372
	1 145235348 145235384	na	na	Insertion	NOTCH2NL	Non syndromic sensorineural hearing loss	PM 22037309
	1 145303996 145357746	na	C	Deletion	NBPF10	Autism	PM 22102821
	1 145303997 145357746	na	na	Homozyg deletion	NBPF10	Autism	PM 22102821
	1 145492319 145492388	na	na	Insertion	LIX1L	Non syndromic sensorineural hearing loss	PM 22037309
	1 145560629 145560719	na	na	Insertion	ANKRD35	Non syndromic sensorineural hearing loss	PM 22037309
	1 145636661 145636751	na	na	Insertion	RNF115	Non syndromic sensorineural hearing loss	PM 22037309
	1 145700718 145711066	na	A	Deletion	CD160	Tetralogy of Fallot	PM 22912587
	1 146041404 146063219	na	na	Copy number	NBPF11	Non syndromic sensorineural hearing loss	PM 19812545
	1 146397002 146438291	na	A	Deletion	NBPF12	Asthma	PM 21150878
	1 146587817 146587906	na	na	Insertion	NBPF13P	Non syndromic sensorineural hearing loss	PM 22037309
	1 146683621 146683706	na	na	Insertion	FMO5	Non syndromic sensorineural hearing loss	PM 22037309
	1 146980171 146980254	na	na	Insertion	LINC00624	Non syndromic sensorineural hearing loss	PM 22037309
	1 147092894 147092994	na	na	Insertion	BCL9	Non syndromic sensorineural hearing loss	PM 22037309
	1 147098505 147098582	na	na	Insertion	BCL9	Non syndromic sensorineural hearing loss	PM 22037309
	1 147404137 147421972	na	na	Cn gain	GPR89B	Non syndromic sensorineural hearing loss	PM 19587683
	1 147425953 147456930	na	na	Loss	GPR89B	early passage human iPS cells	PM 21368824
	1 148304466 148304522	na	C	Deletion	NBPF20	Non syndromic sensorineural hearing loss	PM 21293372
	1 148307246 148307430	na	na	Gain	NBPF20	Autism	PM 21865298
	1 148313653 148313834	na	A	Deletion	NBPF20	Non syndromic sensorineural hearing loss	PM 21293372
	1 149693876 149693926	na	na	Insertion	LOC199882	Non syndromic sensorineural hearing loss	PM 22037309
	1 149923997 149949407	na	na	Insertion or deletion	OTUD7B	Non syndromic sensorineural hearing loss	PM 18451855
	1 149956117 149956205	na	na	Insertion	OTUD7B	Non syndromic sensorineural hearing loss	PM 22037309
	1 150059069 150059169	na	na	Insertion	VPS45	Non syndromic sensorineural hearing loss	PM 22037309
	1 150200127 150200365	na	na	Insertion	ANP32E	Non syndromic sensorineural hearing loss	PM 22037309
	1 150347185 150347285	na	na	Insertion	RPRD2	Non syndromic sensorineural hearing loss	PM 22037309
	1 150526261 150526306	na	na	Insertion	LOC100289061	Non syndromic sensorineural hearing loss	PM 22037309
	1 150777234 150778761	na	G	Deletion	CTSK	Non syndromic sensorineural hearing loss	PM 21293372
	1 151023883 151023937	na	na	Insertion	C1orf56	Non syndromic sensorineural hearing loss	PM 22037309
	1 151240762 151240937	na	na	Loss	PSMD4	Autism	PM 21865298
	1 151278098 151278197	na	na	Insertion	PI4KB	Non syndromic sensorineural hearing loss	PM 22037309
	1 151379144 151379244	na	na	Insertion	POGZ	Non syndromic sensorineural hearing loss	PM 22037309
	1 151400330 151400587	na	T	Deletion	POGZ	Non syndromic sensorineural hearing loss	PM 21293372
	1 151482426 151483175	na	T	Deletion	CGN	Non syndromic sensorineural hearing loss	PM 21293372
	1 151483922 151484956	na	G	Deletion	CGN	Non syndromic sensorineural hearing loss	PM 21293372
	1 151499389 151499469	na	na	Insertion	CGN	Non syndromic sensorineural hearing loss	PM 22037309
	1 151729466 151729541	na	na	Insertion	RPS11P3	Non syndromic sensorineural hearing loss	PM 22037309
	1 151761408 151761460	na	na	Insertion	TDRKH	Non syndromic sensorineural hearing loss	PM 22037309
	1 151820576 151820637	na	na	Insertion	LOC100132111	Non syndromic sensorineural hearing loss	PM 22037309
	1 151961491 151961585	na	na	Insertion	S100A10	Non syndromic sensorineural hearing loss	PM 22037309
	1 152055312 152055457	na	na	Loss	TCHHL1	Autism	PM 21865298
	1 152057967 152061395	na	na	Insertion or deletion	TCHHL1	Non syndromic sensorineural hearing loss	PM 18451855
	1 152059205 152059280	na	na	Insertion	TCHHL1	Non syndromic sensorineural hearing loss	PM 22037309
	1 152124320 152124405	na	na	Insertion	RPTN	Non syndromic sensorineural hearing loss	PM 22037309
	1 152274650 152297679	na	na	Copy number	FLG	Atopic	PM 22158606
	1 152295989 152296089	na	na	Insertion	FLG	Non syndromic sensorineural hearing loss	PM 22037309
	1 152649422 152649522	na	na	Insertion	LCE2C	Non syndromic sensorineural hearing loss	PM 22037309
	1 152718550 152718650	na	na	Insertion	LCEP1	Non syndromic sensorineural hearing loss	PM 22037309
	1 152749308 152749408	na	na	Insertion	LCE1F	Non syndromic sensorineural hearing loss	PM 22037309
	1 153014453 153014553	na	na	Insertion	SPRR2D	Non syndromic sensorineural hearing loss	PM 22037309
	1 153493697 153504125	na	na	Insertion or deletion	S100A6	Non syndromic sensorineural hearing loss	PM 18451855
	1 153525743 153525816	na	na	Insertion	LOC101928034	Non syndromic sensorineural hearing loss	PM 22037309
	1 153720834 153720919	na	na	Insertion	INTS3	Non syndromic sensorineural hearing loss	PM 22037309
	1 153724533 153744944	na	na	Insertion or deletion	INTS3	Non syndromic sensorineural hearing loss	PM 18451855
	1 153926383 153931088	na	G	Deletion	CRTC2	Non syndromic sensorineural hearing loss	PM 21293372
	1 153930709 153930749	na	na	Insertion	CRTC2	Non syndromic sensorineural hearing loss	PM 22037309
	1 153952058 153952158	na	na	Insertion	JTB	Non syndromic sensorineural hearing loss	PM 22037309
	1 154013060 154013198	na	T	Deletion	NUP210L	Non syndromic sensorineural hearing loss	PM 21293372
	1 154077207 154077351	na	na	Insertion	NUP210L	Non syndromic sensorineural hearing loss	PM 22037309
	1 154110887 154111635	na	A	Deletion	NUP210L	Non syndromic sensorineural hearing loss	PM 21293372
	1 154149042 154162259	na	na	Insertion or deletion	TPM3	Non syndromic sensorineural hearing loss	PM 18451855
	1 154294552 154294652	na	na	Insertion	AQP10	Non syndromic sensorineural hearing loss	PM 22037309
	1 154395622 154395689	na	na	Insertion	IL6R	Non syndromic sensorineural hearing loss	PM 22037309
	1 154707650 154707740	na	na	Insertion	KCNN3	Non syndromic sensorineural hearing loss	PM 22037309
	1 154715647 154749452	na	na	Insertion or deletion	KCNN3	Non syndromic sensorineural hearing loss	PM 18451855
	1 154732296 154749727	na	na	Insertion or deletion	KCNN3	Non syndromic sensorineural hearing loss	PM 18451855
	1 154793328 154795559	na	A	Deletion	KCNN3	Non syndromic sensorineural hearing loss	PM 21293372
	1 154978334 154978701	na	na	Cn loss	ZBTB7B	Non syndromic sensorineural hearing loss	PM 19587683
	1 154981047 154981084	na	na	Insertion	ZBTB7B	Non syndromic sensorineural hearing loss	PM 22037309
	1 154996956 155003668	na	na	Cn loss	DCST2	Non syndromic sensorineural hearing loss	PM 19587683
	1 155022407 155022482	na	na	Insertion	DCST1	Non syndromic sensorineural hearing loss	PM 22037309
	1 155151242 155151292	na	na	Insertion	KRTCAP2	Non syndromic sensorineural hearing loss	PM 22037309
	1 155285484 155285874	na	C	Deletion	FDPS	Non syndromic sensorineural hearing loss	PM 21293372
	1 155294899 155294934	na	na	Insertion	RUSC1 AS1	Non syndromic sensorineural hearing loss	PM 22037309
	1 155399313 155399413	na	na	Insertion	ASH1L	Non syndromic sensorineural hearing loss	PM 22037309
	1 155440486 155442005	na	G	Deletion	ASH1L	Non syndromic sensorineural hearing loss	PM 21293372
	1 155768446 155799641	na	na	Insertion or deletion	GON4L	Non syndromic sensorineural hearing loss	PM 18451855
	1 155807274 155807489	na	T	Deletion	GON4L	Non syndromic sensorineural hearing loss	PM 21293372
	1 155807285 155807500	na	G	Deletion	GON4L	Non syndromic sensorineural hearing loss	PM 21293372
	1 156089702 156089802	na	na	Insertion	LMNA	Non syndromic sensorineural hearing loss	PM 22037309
	1 156186403 156186443	na	na	Insertion	PMF1	Non syndromic sensorineural hearing loss	PM 22037309
	1 156204104 156204242	na	G	Deletion	PMF1	Non syndromic sensorineural hearing loss	PM 21293372
	1 156261883 156261983	na	na	Insertion	TMEM79	Non syndromic sensorineural hearing loss	PM 22037309
	1 156264369 156264467	na	na	Insertion	GLMP	Non syndromic sensorineural hearing loss	PM 22037309
	1 156307223 156307353	na	na	Insertion	CCT3	Non syndromic sensorineural hearing loss	PM 22037309
	1 156317337 156317658	na	C	Deletion	TSACC	Non syndromic sensorineural hearing loss	PM 21293372
	1 156373072 156373172	na	na	Insertion	C1orf61	Non syndromic sensorineural hearing loss	PM 22037309
	1 156396718 156396791	na	T	Deletion	C1orf61	Non syndromic sensorineural hearing loss	PM 21293372
	1 156457917 156457987	na	na	Insertion	MEF2D	Non syndromic sensorineural hearing loss	PM 22037309
	1 156535509 156535609	na	na	Insertion	IQGAP3	Non syndromic sensorineural hearing loss	PM 22037309
	1 156677379 156677479	na	na	Insertion	CRABP2	Non syndromic sensorineural hearing loss	PM 22037309
	1 156811659 156811732	na	na	Insertion	NTRK1	Non syndromic sensorineural hearing loss	PM 22037309
	1 156815969 156847368	na	na	Insertion or deletion	NTRK1	Non syndromic sensorineural hearing loss	PM 18451855
	1 156873884 156874008	na	C	Deletion	PEAR1	Non syndromic sensorineural hearing loss	PM 21293372
	1 156895995 156896323	na	T	Deletion	LRRC71	Non syndromic sensorineural hearing loss	PM 21293372
	1 156978655 156978977	na	T	Deletion	ARHGEF11	Non syndromic sensorineural hearing loss	PM 21293372
	1 156986620 156992481	na	T	Deletion	ARHGEF11	Non syndromic sensorineural hearing loss	PM 21293372
	1 156993464 156994771	na	na	High copy gain	ARHGEF11	Non syndromic sensorineural hearing loss	PM 19587683
	1 156993474 156994558	na	T	Deletion	ARHGEF11	Non syndromic sensorineural hearing loss	PM 21293372
	1 156993549 156994633	na	C	Deletion	ARHGEF11	Non syndromic sensorineural hearing loss	PM 21293372
	1 157541833 157541933	na	na	Insertion	FCRL4	Non syndromic sensorineural hearing loss	PM 22037309
	1 157974102 157974202	na	na	Insertion	KIRREL	Non syndromic sensorineural hearing loss	PM 22037309
	1 158217028 158226156	na	na	Insertion or deletion	CD1A	Non syndromic sensorineural hearing loss	PM 18451855
	1 158221247 158224986	na	na	Insertion or deletion	CD1A	Non syndromic sensorineural hearing loss	PM 18451855
	1 158417204 158417304	na	na	Insertion	OR10T1P	Non syndromic sensorineural hearing loss	PM 22037309
	1 158603053 158603153	na	na	Insertion	SPTA1	Non syndromic sensorineural hearing loss	PM 22037309
	1 158767841 158767941	na	na	Insertion	OR2AQ1P	Non syndromic sensorineural hearing loss	PM 22037309
	1 159183335 159183435	na	na	Insertion	ACKR1	Non syndromic sensorineural hearing loss	PM 22037309
	1 159568302 159568402	na	na	Insertion	OR10J6P	Non syndromic sensorineural hearing loss	PM 22037309
	1 159776981 159777081	na	na	Insertion	FCRL6	Non syndromic sensorineural hearing loss	PM 22037309
	1 159919723 159919823	na	na	Insertion	SLAMF9	Non syndromic sensorineural hearing loss	PM 22037309
	1 159923165 159923258	na	na	Insertion	SLAMF9	Non syndromic sensorineural hearing loss	PM 22037309
	1 160002297 160002397	na	na	Insertion	PIGM	Non syndromic sensorineural hearing loss	PM 22037309
	1 160097520 160108831	na	na	Gain	ATP1A2	early passage human iPS cells	PM 21368824
	1 160102273 160102357	na	na	Insertion	ATP1A2	Non syndromic sensorineural hearing loss	PM 22037309
	1 160129516 160129616	na	na	Insertion	ATP1A4	Non syndromic sensorineural hearing loss	PM 22037309
	1 160253193 160253225	na	na	Insertion	PEX19	Non syndromic sensorineural hearing loss	PM 22037309
	1 160319289 160319609	na	C	Deletion	NCSTN	Non syndromic sensorineural hearing loss	PM 21293372
	1 160398162 160398262	na	na	Insertion	VANGL2	Non syndromic sensorineural hearing loss	PM 22037309
	1 160458066 160458166	na	na	Insertion	SLAMF6	Non syndromic sensorineural hearing loss	PM 22037309
	1 160518276 160518366	na	na	Insertion	CD84	Non syndromic sensorineural hearing loss	PM 22037309
	1 160598869 160598969	na	na	Insertion	SLAMF1	Non syndromic sensorineural hearing loss	PM 22037309
	1 161034676 161034772	na	na	Insertion	ARHGAP30	Non syndromic sensorineural hearing loss	PM 22037309
	1 161197407 161197502	na	na	Insertion	TOMM40L	Non syndromic sensorineural hearing loss	PM 22037309
	1 161370976 161371076	na	na	Insertion	TRV CAC1 1	Non syndromic sensorineural hearing loss	PM 22037309
	1 161472875 161472965	na	na	Insertion	FCGR2A	Non syndromic sensorineural hearing loss	PM 22037309
	1 161513128 161513216	na	A	Deletion	FCGR3A	Non syndromic sensorineural hearing loss	PM 21293372
	1 161760604 161760664	na	na	Insertion	ATF6	Non syndromic sensorineural hearing loss	PM 22037309
	1 161870840 161894850	na	na	Insertion or deletion	ATF6	Non syndromic sensorineural hearing loss	PM 18451855
	1 162033527 162033627	na	na	Insertion	NOS1AP	Non syndromic sensorineural hearing loss	PM 22037309
	1 162045033 162045133	na	na	Insertion	NOS1AP	Non syndromic sensorineural hearing loss	PM 22037309
	1 162128522 162128573	na	T	Deletion	NOS1AP	Non syndromic sensorineural hearing loss	PM 21293372
	1 162214780 162249481	na	na	Insertion or deletion	NOS1AP	Non syndromic sensorineural hearing loss	PM 18451855
	1 162273828 162291036	na	na	Insertion or deletion	NOS1AP	Non syndromic sensorineural hearing loss	PM 18451855
	1 162685253 162685353	na	na	Insertion	DDR2	Non syndromic sensorineural hearing loss	PM 22037309
	1 163040908 163041008	na	na	Insertion	RGS4	Non syndromic sensorineural hearing loss	PM 22037309
	1 163281489 163281547	na	A	Deletion	RGS5	Non syndromic sensorineural hearing loss	PM 21293372
	1 163314187 163314445	na	na	Insertion	NUF2	Non syndromic sensorineural hearing loss	PM 22037309
	1 164539982 164540134	na	A	Deletion	PBX1	Non syndromic sensorineural hearing loss	PM 21293372
	1 164663203 164663717	na	C	Deletion	PBX1	Non syndromic sensorineural hearing loss	PM 21293372
	1 164755789 164755889	na	na	Insertion	PBX1	Non syndromic sensorineural hearing loss	PM 22037309
	1 164818201 164819152	na	G	Deletion	PBX1	Non syndromic sensorineural hearing loss	PM 21293372
	1 165242843 165242934	na	na	Insertion	LMX1A	Non syndromic sensorineural hearing loss	PM 22037309
	1 165462850 165462884	na	na	Insertion	LOC400794	Non syndromic sensorineural hearing loss	PM 22037309
	1 165861389 165861577	na	na	Insertion	UCK2	Non syndromic sensorineural hearing loss	PM 22037309
	1 166031947 166034220	na	G	Deletion	FAM78B	Non syndromic sensorineural hearing loss	PM 21293372
	1 166033228 166033326	na	na	Insertion	FAM78B	Non syndromic sensorineural hearing loss	PM 22037309
	1 166038498 166038598	na	na	Insertion	FAM78B	Non syndromic sensorineural hearing loss	PM 22037309
	1 166080052 166080152	na	na	Insertion	FAM78B	Non syndromic sensorineural hearing loss	PM 22037309
	1 166588056 166588136	na	na	Insertion	FMO9P	Non syndromic sensorineural hearing loss	PM 22037309
	1 166811242 166811332	na	na	Insertion	POGK	Non syndromic sensorineural hearing loss	PM 22037309
	1 166820633 166820781	na	T	Deletion	POGK	Non syndromic sensorineural hearing loss	PM 21293372
	1 166838883 166840859	na	A	Deletion	TADA1	Non syndromic sensorineural hearing loss	PM 21293372
	1 166895471 166895568	na	na	Insertion	ILDR2	Non syndromic sensorineural hearing loss	PM 22037309
	1 166924841 166925838	na	na	Cn gain	ILDR2	Non syndromic sensorineural hearing loss	PM 19587683
	1 167028062 167028162	na	na	Insertion	GPA33	Non syndromic sensorineural hearing loss	PM 22037309
	1 167234942 167268627	na	na	Insertion or deletion	POU2F1	Non syndromic sensorineural hearing loss	PM 18451855
	1 167270838 167278445	na	na	High copy gain	POU2F1	Non syndromic sensorineural hearing loss	PM 19587683
	1 167270950 167271957	na	C	Deletion	POU2F1	Non syndromic sensorineural hearing loss	PM 21293372
	1 167270982 167271853	na	G	Deletion	POU2F1	Non syndromic sensorineural hearing loss	PM 21293372
	1 167274374 167274473	na	T	Deletion	POU2F1	Non syndromic sensorineural hearing loss	PM 21293372
	1 167291363 167291533	na	T	Deletion	POU2F1	Non syndromic sensorineural hearing loss	PM 21293372
	1 167340339 167340439	na	na	Insertion	POU2F1	Non syndromic sensorineural hearing loss	PM 22037309
	1 167426644 167426973	na	A	Deletion	CD247	Non syndromic sensorineural hearing loss	PM 21293372
	1 167433121 167433220	na	na	Insertion	CD247	Non syndromic sensorineural hearing loss	PM 22037309
	1 167489002 167489082	na	na	Insertion	CD247	Non syndromic sensorineural hearing loss	PM 22037309
	1 167505881 167506016	na	na	Insertion	AKR1D1P1	Non syndromic sensorineural hearing loss	PM 22037309
	1 167619448 167619522	na	na	Insertion	RCSD1	Non syndromic sensorineural hearing loss	PM 22037309
	1 167699896 167704631	na	na	Insertion or deletion	MPZL1	Non syndromic sensorineural hearing loss	PM 18451855
	1 167709595 167712309	na	T	Deletion	MPZL1	Non syndromic sensorineural hearing loss	PM 21293372
	1 167738538 167738639	na	T	Deletion	MPZL1	Non syndromic sensorineural hearing loss	PM 21293372
	1 167803937 167803977	na	na	Insertion	ADCY10	Non syndromic sensorineural hearing loss	PM 22037309
	1 167926518 167926725	na	na	Cn gain	DCAF6	Non syndromic sensorineural hearing loss	PM 19587683
	1 168067927 168068027	na	na	Insertion	GPR161	Non syndromic sensorineural hearing loss	PM 22037309
	1 168212997 168213081	na	na	Insertion	SFT2D2	Non syndromic sensorineural hearing loss	PM 22037309
	1 168257341 168257441	na	na	Insertion	TBX19	Non syndromic sensorineural hearing loss	PM 22037309
	1 168637406 168649848	na	na	Loss	DPT	early passage human iPS cells	PM 21368824
	1 168663878 168663978	na	na	Insertion	DPT	Non syndromic sensorineural hearing loss	PM 22037309
	1 168760471 168760571	na	na	Insertion	LINC00626	Non syndromic sensorineural hearing loss	PM 22037309
	1 169240917 169274588	na	na	Insertion or deletion	NME7	Non syndromic sensorineural hearing loss	PM 18451855
	1 169284347 169284447	na	na	Insertion	NME7	Non syndromic sensorineural hearing loss	PM 22037309
	1 169345767 169345867	na	na	Insertion	BLZF1	Non syndromic sensorineural hearing loss	PM 22037309
	1 169442867 169442967	na	na	Insertion	SLC19A2	Non syndromic sensorineural hearing loss	PM 22037309
	1 169446480 169446644	na	G	Deletion	SLC19A2	Non syndromic sensorineural hearing loss	PM 21293372
	1 169456746 169456861	na	T	Deletion	SLC19A2	Non syndromic sensorineural hearing loss	PM 21293372
	1 169527843 169528165	na	T	Deletion	F5	Non syndromic sensorineural hearing loss	PM 21293372
	1 169700777 169701071	na	T	Deletion	SELE	Non syndromic sensorineural hearing loss	PM 21293372
	1 169854889 169854989	na	na	Insertion	SCYL3	Non syndromic sensorineural hearing loss	PM 22037309
	1 169914448 169914548	na	na	Insertion	KIFAP3	Non syndromic sensorineural hearing loss	PM 22037309
	1 170138360 170138450	na	na	Insertion	METTL11B	Non syndromic sensorineural hearing loss	PM 22037309
	1 170634349 170634404	na	na	Insertion	PRRX1	Non syndromic sensorineural hearing loss	PM 22037309
	1 170952789 170953102	na	C	Deletion	MROH9	Non syndromic sensorineural hearing loss	PM 21293372
	1 171708059 171708159	na	na	Insertion	VAMP4	Non syndromic sensorineural hearing loss	PM 22037309
	1 171772334 171772429	na	na	Insertion	RPS15P3	Non syndromic sensorineural hearing loss	PM 22037309
	1 171774620 171774720	na	na	Insertion	RPS15P3	Non syndromic sensorineural hearing loss	PM 22037309
	1 171781454 171781530	na	na	Insertion	RPS15P3	Non syndromic sensorineural hearing loss	PM 22037309
	1 171810934 171811004	na	na	Insertion	DNM3	Non syndromic sensorineural hearing loss	PM 22037309
	1 171936289 171970634	na	na	In	DNM3	Congenital diaphragmatic hernia	PM 21525063
	1 172142024 172310899	na	na	Gain	DNM3	Autism	PM 20531469
	1 172143328 172209802	na	na	Loss	DNM3	Hereditary coagulopathy	PM 21993689
	1 172172282 172204106	na	na	Insertion or deletion	DNM3	Non syndromic sensorineural hearing loss	PM 18451855
	1 172211360 172211690	na	G	Deletion	DNM3	Non syndromic sensorineural hearing loss	PM 21293372
	1 172234336 172267240	na	na	Insertion or deletion	DNM3	Non syndromic sensorineural hearing loss	PM 18451855
	1 172417282 172417382	na	na	Insertion	C1orf105	Non syndromic sensorineural hearing loss	PM 22037309
	1 172499514 172533332	na	na	Insertion or deletion	SUCO	Non syndromic sensorineural hearing loss	PM 18451855
	1 172857999 172858075	na	na	Insertion	AIMP1P2	Non syndromic sensorineural hearing loss	PM 22037309
	1 173205575 173205675	na	na	Insertion	LOC100506023	Non syndromic sensorineural hearing loss	PM 22037309
	1 173235894 173396827	na	na	Copy number	LOC100506023	Non syndromic sensorineural hearing loss	PM 21987784
	1 173308352 173352667	na	na	Insertion or deletion	LOC100506023	Non syndromic sensorineural hearing loss	PM 18451855
	1 173358214 173358266	na	T	Deletion	LOC100506023	Non syndromic sensorineural hearing loss	PM 21293372
	1 173382002 173382102	na	na	Insertion	LOC100506023	Non syndromic sensorineural hearing loss	PM 22037309
	1 173386748 173386847	na	na	Insertion	LOC100506023	Non syndromic sensorineural hearing loss	PM 22037309
	1 173570392 173570482	na	na	Insertion	SLC9C2	Non syndromic sensorineural hearing loss	PM 22037309
	1 173594800 173594949	na	A	Deletion	ANKRD45	Non syndromic sensorineural hearing loss	PM 21293372
	1 173682337 173682437	na	na	Insertion	KLHL20	Non syndromic sensorineural hearing loss	PM 22037309
	1 174333025 174333193	na	na	Insertion	RABGAP1L	Non syndromic sensorineural hearing loss	PM 22037309
	1 174500555 174543675	na	na	Duplication	RABGAP1L	Autism	PM 19404257
	1 174503844 174523252	na	na	Loss	RABGAP1L	Schizophrenia	PM 23813976
	1 174536641 174536699	na	A	Deletion	RABGAP1L	Non syndromic sensorineural hearing loss	PM 21293372
	1 174744840 174745395	na	A	Deletion	RABGAP1L	Non syndromic sensorineural hearing loss	PM 21293372
	1 174857251 174879943	na	A	Deletion	RABGAP1L	Non syndromic sensorineural hearing loss	PM 21293372
	1 174992046 174992136	na	na	Insertion	MRPS14	Non syndromic sensorineural hearing loss	PM 22037309
	1 175047110 175047195	na	na	Insertion	TNN	Non syndromic sensorineural hearing loss	PM 22037309
	1 175163510 175163610	na	na	Insertion	KIAA0040	Non syndromic sensorineural hearing loss	PM 22037309
	1 175333432 175333497	na	na	Insertion	TNR	Non syndromic sensorineural hearing loss	PM 22037309
	1 175552032 175569291	na	na	Insertion or deletion	TNR	Non syndromic sensorineural hearing loss	PM 18451855
	1 176137665 176137742	na	na	Insertion	RFWD2	Non syndromic sensorineural hearing loss	PM 22037309
	1 176491841 176491916	na	na	Insertion	PAPPA2	Non syndromic sensorineural hearing loss	PM 22037309
	1 176612332 176642952	na	na	Insertion or deletion	PAPPA2	Non syndromic sensorineural hearing loss	PM 18451855
	1 176730517 176775211	na	na	Insertion or deletion	PAPPA2	Non syndromic sensorineural hearing loss	PM 18451855
	1 176761908 176762261	na	C	Deletion	PAPPA2	Non syndromic sensorineural hearing loss	PM 21293372
	1 176884532 176884629	na	na	Insertion	ASTN1	Non syndromic sensorineural hearing loss	PM 22037309
	1 177141750 177141850	na	na	Insertion	BRINP2	Non syndromic sensorineural hearing loss	PM 22037309
	1 177872841 177872941	na	na	Insertion	SEC16B	Non syndromic sensorineural hearing loss	PM 22037309
	1 177873904 177874670	na	A	Deletion	SEC16B	Non syndromic sensorineural hearing loss	PM 21293372
	1 177873979 177874648	na	G	Deletion	SEC16B	Non syndromic sensorineural hearing loss	PM 21293372
	1 177874931 177875005	na	na	Insertion	SEC16B	Non syndromic sensorineural hearing loss	PM 22037309
	1 178063595 178063655	na	na	Insertion	RASAL2 AS1	Non syndromic sensorineural hearing loss	PM 22037309
	1 178542324 178542422	na	na	Insertion	C1orf220	Non syndromic sensorineural hearing loss	PM 22037309
	1 178559612 178559936	na	T	Deletion	C1orf220	Non syndromic sensorineural hearing loss	PM 21293372
	1 178560646 178560695	na	na	Insertion	C1orf220	Non syndromic sensorineural hearing loss	PM 22037309
	1 178566775 178566857	na	na	Insertion	C1orf220	Non syndromic sensorineural hearing loss	PM 22037309
	1 178745926 178746076	na	na	Insertion	RALGPS2	Non syndromic sensorineural hearing loss	PM 22037309
	1 178996885 178996985	na	na	Insertion	FAM20B	Non syndromic sensorineural hearing loss	PM 22037309
	1 179016390 179022021	na	C	Deletion	FAM20B	Non syndromic sensorineural hearing loss	PM 21293372
	1 179016391 179022016	na	A	Deletion	FAM20B	Non syndromic sensorineural hearing loss	PM 21293372
	1 179017028 179022129	na	G	Deletion	FAM20B	Non syndromic sensorineural hearing loss	PM 21293372
	1 179074024 179074124	na	na	Insertion	ABL2	Non syndromic sensorineural hearing loss	PM 22037309
	1 179179149 179179208	na	A	Deletion	ABL2	Non syndromic sensorineural hearing loss	PM 21293372
	1 179199678 179199778	na	na	Insertion	ABL2	Non syndromic sensorineural hearing loss	PM 22037309
	1 179284152 179284252	na	na	Insertion	SOAT1	Non syndromic sensorineural hearing loss	PM 22037309
	1 179286370 179286933	na	na	Cn loss	SOAT1	Non syndromic sensorineural hearing loss	PM 19587683
	1 179491793 179491954	na	na	Insertion	AXDND1	Non syndromic sensorineural hearing loss	PM 22037309
	1 179630335 179630417	na	na	Insertion	TDRD5	Non syndromic sensorineural hearing loss	PM 22037309
	1 179698820 179698920	na	na	Insertion	FAM163A	Non syndromic sensorineural hearing loss	PM 22037309
	1 179747382 179747459	na	na	Insertion	FAM163A	Non syndromic sensorineural hearing loss	PM 22037309
	1 179924754 179926605	na	A	Deletion	CEP350	Non syndromic sensorineural hearing loss	PM 19036926
	1 179986552 179986652	na	na	Insertion	CEP350	Non syndromic sensorineural hearing loss	PM 22037309
	1 180206145 180206230	na	na	Insertion	LHX4	Non syndromic sensorineural hearing loss	PM 22037309
	1 180609084 180609184	na	na	Insertion	XPR1	Non syndromic sensorineural hearing loss	PM 22037309
	1 180626647 180627201	na	na	Loss	XPR1	Autism	PM 21865298
	1 180916292 180916392	na	na	Insertion	KIAA1614	Non syndromic sensorineural hearing loss	PM 22037309
	1 180941302 180941483	na	C	Deletion	STX6	Non syndromic sensorineural hearing loss	PM 21293372
	1 180946036 180946136	na	na	Insertion	STX6	Non syndromic sensorineural hearing loss	PM 22037309
	1 181145113 181145218	na	na	Insertion	LOC101928973	Non syndromic sensorineural hearing loss	PM 22037309
	1 181486742 181486805	na	na	Insertion	CACNA1E	Non syndromic sensorineural hearing loss	PM 22037309
	1 181516099 181524328	na	na	Insertion or deletion	CACNA1E	Non syndromic sensorineural hearing loss	PM 18451855
	1 181575283 181575736	na	A	Deletion	CACNA1E	Non syndromic sensorineural hearing loss	PM 21293372
	1 182374943 182375043	na	na	Insertion	LINC00272	Non syndromic sensorineural hearing loss	PM 22037309
	1 182419701 182419780	na	na	Insertion	RGSL1	Non syndromic sensorineural hearing loss	PM 22037309
	1 182772607 182772691	na	na	Insertion	NPL	Non syndromic sensorineural hearing loss	PM 22037309
	1 183081350 183087423	na	C	Deletion	LAMC1	Non syndromic sensorineural hearing loss	PM 21293372
	1 183081351 183087407	na	T	Deletion	LAMC1	Non syndromic sensorineural hearing loss	PM 21293372
	1 183203660 183203982	na	G	Deletion	LAMC2	Non syndromic sensorineural hearing loss	PM 21293372
	1 183237463 183237548	na	na	Insertion	NMNAT2	Non syndromic sensorineural hearing loss	PM 22037309
	1 183276424 183278356	na	G	Deletion	NMNAT2	Non syndromic sensorineural hearing loss	PM 21293372
	1 183276508 183278363	na	C	Deletion	NMNAT2	Non syndromic sensorineural hearing loss	PM 21293372
	1 183522835 183522920	na	na	Insertion	SMG7	Non syndromic sensorineural hearing loss	PM 22037309
	1 183639216 183672750	na	na	Insertion or deletion	RGL1	Non syndromic sensorineural hearing loss	PM 18451855
	1 183639719 183640057	na	C	Deletion	RGL1	Non syndromic sensorineural hearing loss	PM 21293372
	1 183669085 183669210	na	na	Insertion	RGL1	Non syndromic sensorineural hearing loss	PM 22037309
	1 183836369 183836640	na	G	Deletion	RGL1	Non syndromic sensorineural hearing loss	PM 21293372
	1 183855768 183855856	na	A	Deletion	RGL1	Non syndromic sensorineural hearing loss	PM 21293372
	1 183992124 183992213	na	na	Insertion	COLGALT2	Non syndromic sensorineural hearing loss	PM 22037309
	1 184007929 184008071	na	na	Insertion	COLGALT2	Non syndromic sensorineural hearing loss	PM 22037309
	1 184033427 184033749	na	G	Deletion	TSEN15	Non syndromic sensorineural hearing loss	PM 21293372
	1 184437532 184437632	na	na	Insertion	C1orf21	Non syndromic sensorineural hearing loss	PM 22037309
	1 184437786 184455411	na	na	Insertion or deletion	C1orf21	Non syndromic sensorineural hearing loss	PM 18451855
	1 184594231 184594414	na	na	Loss	C1orf21	Autism	PM 21865298
	1 184662172 184662252	na	na	Insertion	EDEM3	Non syndromic sensorineural hearing loss	PM 22037309
	1 184665398 184665480	na	T	Deletion	EDEM3	Non syndromic sensorineural hearing loss	PM 21293372
	1 185170172 185170282	na	G	Deletion	SWT1	Non syndromic sensorineural hearing loss	PM 21293372
	1 185189381 185189481	na	na	Insertion	SWT1	Non syndromic sensorineural hearing loss	PM 22037309
	1 185731457 185733106	na	T	Deletion	HMCN1	Non syndromic sensorineural hearing loss	PM 21293372
	1 185742582 185742682	na	na	Insertion	HMCN1	Non syndromic sensorineural hearing loss	PM 22037309
	1 185982727 185989155	na	G	Deletion	HMCN1	Non syndromic sensorineural hearing loss	PM 21293372
	1 186413714 186413799	na	na	Insertion	PDC	Non syndromic sensorineural hearing loss	PM 22037309
	1 186782302 186782385	na	na	Insertion	PLA2G4A	Non syndromic sensorineural hearing loss	PM 22037309
	1 186784046 186784105	na	na	Insertion	PLA2G4A	Non syndromic sensorineural hearing loss	PM 22037309
	1 186806077 186806852	na	G	Deletion	PLA2G4A	Non syndromic sensorineural hearing loss	PM 21293372
	1 186879397 186913678	na	na	Insertion or deletion	PLA2G4A	Non syndromic sensorineural hearing loss	PM 18451855
	1 186906439 186906471	na	na	Insertion	PLA2G4A	Non syndromic sensorineural hearing loss	PM 22037309
	1 189103942 189104113	na	C	Deletion	GAPDHP75	Non syndromic sensorineural hearing loss	PM 21293372
	1 189243006 189272400	na	na	Loss	LOC101929766	early passage human iPS cells	PM 21368824
	1 189243006 189275047	na	na	Loss	LOC101929766	early passage human iPS cells	PM 21368824
	1 189243006 189282183	na	na	Loss	LOC101929766	early passage human iPS cells	PM 21368824
	1 189243006 189283891	na	na	Loss	LOC101929766	early passage human iPS cells	PM 21368824
	1 189243006 189288451	na	na	Loss	LOC101929766	early passage human iPS cells	PM 21368824
	1 189243006 189288794	na	na	Loss	LOC101929766	early passage human iPS cells	PM 21368824
	1 189243006 189298445	na	na	Loss	LOC101929766	early passage human iPS cells	PM 21368824
	1 189243006 189300599	na	na	Loss	LOC101929766	early passage human iPS cells	PM 21368824
	1 189245233 189275004	na	na	Loss	LOC101929766	early passage human iPS cells	PM 21368824
	1 189246831 189247041	na	na	Insertion	LOC101929766	Non syndromic sensorineural hearing loss	PM 22037309
	1 189247080 189247208	na	na	Insertion	LOC101929766	Non syndromic sensorineural hearing loss	PM 22037309
	1 189262148 189292449	na	na	Insertion or deletion	LOC101929766	Non syndromic sensorineural hearing loss	PM 18451855
	1 189293012 189293112	na	na	Insertion	LOC101929766	Non syndromic sensorineural hearing loss	PM 22037309
	1 190093124 190135097	na	T	Deletion	BRINP3	Non syndromic sensorineural hearing loss	PM 21293372
	1 190095924 190096024	na	na	Insertion	BRINP3	Non syndromic sensorineural hearing loss	PM 22037309
	1 190157257 190194693	na	na	Loss	BRINP3	early passage human iPS cells	PM 21368824
	1 190163376 190196902	na	na	Loss	BRINP3	early passage human iPS cells	PM 21368824
	1 190183067 190185176	na	G	Deletion	BRINP3	Non syndromic sensorineural hearing loss	PM 21293372
	1 190601931 190602031	na	na	Insertion	LOC440704	Non syndromic sensorineural hearing loss	PM 22037309
	1 192326702 192326865	na	G	Deletion	RGS21	Non syndromic sensorineural hearing loss	PM 21293372
	1 193096833 193096933	na	na	Insertion	CDC73	Non syndromic sensorineural hearing loss	PM 22037309
	1 193863892 193863992	na	na	Insertion	RPL23AP22	Non syndromic sensorineural hearing loss	PM 22037309
	1 193879632 193879664	na	na	Insertion	RPL23AP22	Non syndromic sensorineural hearing loss	PM 22037309
	1 195535473 195536355	na	T	Deletion	KCNT2	Non syndromic sensorineural hearing loss	PM 21293372
	1 195539720 195539820	na	na	Insertion	KCNT2	Non syndromic sensorineural hearing loss	PM 22037309
	1 195689567 195689652	na	na	Insertion	KCNT2	Non syndromic sensorineural hearing loss	PM 22037309
	1 195767131 195769894	na	G	Deletion	KCNT2	Non syndromic sensorineural hearing loss	PM 21293372
	1 195925973 195926073	na	na	Insertion	KCNT2	Non syndromic sensorineural hearing loss	PM 22037309
	1 195934850 195934988	na	na	Insertion	KCNT2	Non syndromic sensorineural hearing loss	PM 22037309
	1 195954459 195957309	na	T	Deletion	KCNT2	Non syndromic sensorineural hearing loss	PM 21293372
	1 195985300 195985400	na	na	Insertion	KCNT2	Non syndromic sensorineural hearing loss	PM 22037309
	1 196011705 196011737	na	na	Insertion	KCNT2	Non syndromic sensorineural hearing loss	PM 22037309
	1 196017165 196017282	na	na	Insertion	KCNT2	Non syndromic sensorineural hearing loss	PM 22037309
	1 196089982 196090082	na	na	Insertion	KCNT2	Non syndromic sensorineural hearing loss	PM 22037309
	1 196122729 196122829	na	na	Insertion	KCNT2	Non syndromic sensorineural hearing loss	PM 22037309
	1 196160641 196160925	na	A	Deletion	KCNT2	Non syndromic sensorineural hearing loss	PM 21293372
	1 196243084 196243184	na	na	Insertion	KCNT2	Non syndromic sensorineural hearing loss	PM 22037309
	1 196384265 196492556	na	na	Copy number	KCNT2	Non syndromic sensorineural hearing loss	PM 21987784
	1 196392815 196555392	na	A	Deletion	KCNT2	Intellectual disability	PM 21811512
	1 196571234 196571368	na	T	Deletion	KCNT2	Non syndromic sensorineural hearing loss	PM 19036926
	1 196571276 196576901	na	A	Deletion	KCNT2	Non syndromic sensorineural hearing loss	PM 21293372
	1 196685609 196685709	na	na	Insertion	CFH	Non syndromic sensorineural hearing loss	PM 22037309
	1 196969857 196970056	na	na	Cn loss	CFHR5	Non syndromic sensorineural hearing loss	PM 19587683
	1 196970764 196970985	na	na	Loss	CFHR5	Autism	PM 21865298
	1 197182433 197182533	na	na	Insertion	CRB1	Non syndromic sensorineural hearing loss	PM 22037309
	1 197196474 197196540	na	na	Insertion	CRB1	Non syndromic sensorineural hearing loss	PM 22037309
	1 197339333 197357972	na	na	Loss	CRB1	early passage human iPS cells	PM 21368824
	1 197339345 197361255	na	na	Loss	CRB1	Schizophrenia	PM 23813976
	1 197370760 197370859	na	na	Insertion	CRB1	Non syndromic sensorineural hearing loss	PM 22037309
	1 197376670 197380428	na	C	Deletion	CRB1	Non syndromic sensorineural hearing loss	PM 21293372
	1 197550778 197550878	na	na	Insertion	DENND1B	Non syndromic sensorineural hearing loss	PM 22037309
	1 197705349 197706856	na	A	Deletion	DENND1B	Non syndromic sensorineural hearing loss	PM 21293372
	1 198239665 198272516	na	na	Insertion or deletion	NEK7	Non syndromic sensorineural hearing loss	PM 18451855
	1 198261011 198261111	na	na	Insertion	NEK7	Non syndromic sensorineural hearing loss	PM 22037309
	1 198618753 198629867	na	na	Insertion or deletion	PTPRC	Non syndromic sensorineural hearing loss	PM 18451855
	1 198663727 198663827	na	na	Insertion	PTPRC	Non syndromic sensorineural hearing loss	PM 22037309
	1 198830510 198830610	na	na	Insertion	MIR181A1HG	Non syndromic sensorineural hearing loss	PM 22037309
	1 198841555 198841697	na	na	Loss	MIR181A1HG	Autism	PM 21865298
	1 198899151 198899198	na	na	Insertion	MIR181A1HG	Non syndromic sensorineural hearing loss	PM 22037309
	1 199145927 199146018	na	na	Insertion	FLJ43585	Non syndromic sensorineural hearing loss	PM 22037309
	1 199168098 199168198	na	na	Insertion	FLJ43585	Non syndromic sensorineural hearing loss	PM 22037309
	1 199251650 199251750	na	na	Insertion	FLJ43585	Non syndromic sensorineural hearing loss	PM 22037309
	1 199304011 199304111	na	na	Insertion	FLJ43585	Non syndromic sensorineural hearing loss	PM 22037309
	1 200091835 200091935	na	na	Insertion	NR5A2	Non syndromic sensorineural hearing loss	PM 22037309
	1 200332824 200332912	na	na	Insertion	LINC00862	Non syndromic sensorineural hearing loss	PM 22037309
	1 200627321 200627831	na	A	Deletion	DDX59	Non syndromic sensorineural hearing loss	PM 21293372
	1 200711989 200712089	na	na	Insertion	CAMSAP2	Non syndromic sensorineural hearing loss	PM 22037309
	1 200876298 200876398	na	na	Insertion	C1orf106	Non syndromic sensorineural hearing loss	PM 22037309
	1 200898876 200898976	na	na	Insertion	MROH3P	Non syndromic sensorineural hearing loss	PM 22037309
	1 200990044 200990129	na	na	Insertion	KIF21B	Non syndromic sensorineural hearing loss	PM 22037309
	1 201010185 201010272	na	na	Insertion	CACNA1S	Non syndromic sensorineural hearing loss	PM 22037309
	1 201110302 201110380	na	G	Deletion	TMEM9	Non syndromic sensorineural hearing loss	PM 21293372
	1 201256915 201292020	na	na	Insertion or deletion	PKP1	Non syndromic sensorineural hearing loss	PM 18451855
	1 201288747 201288827	na	na	Insertion	PKP1	Non syndromic sensorineural hearing loss	PM 22037309
	1 201379374 201379420	na	na	Insertion	TNNI1	Non syndromic sensorineural hearing loss	PM 22037309
	1 201601928 201602028	na	na	Insertion	NAV1	Non syndromic sensorineural hearing loss	PM 22037309
	1 201615904 201615964	na	na	Insertion	NAV1	Non syndromic sensorineural hearing loss	PM 22037309
	1 201685289 201717387	na	na	Insertion or deletion	NAV1	Non syndromic sensorineural hearing loss	PM 18451855
	1 201757440 201757514	na	na	Insertion	NAV1	Non syndromic sensorineural hearing loss	PM 22037309
	1 201844001 201844101	na	na	Insertion	IPO9	Non syndromic sensorineural hearing loss	PM 22037309
	1 201916735 201916806	na	na	Insertion	LMOD1	Non syndromic sensorineural hearing loss	PM 22037309
	1 201925225 201925325	na	na	Insertion	TIMM17A	Non syndromic sensorineural hearing loss	PM 22037309
	1 201950931 201952854	na	T	Deletion	RNPEP	Non syndromic sensorineural hearing loss	PM 21293372
	1 201951053 201952979	na	C	Deletion	RNPEP	Non syndromic sensorineural hearing loss	PM 21293372
	1 202093644 202093744	na	na	Insertion	GPR37L1	Non syndromic sensorineural hearing loss	PM 22037309
	1 202135770 202135870	na	na	Insertion	PTPRVP	Non syndromic sensorineural hearing loss	PM 22037309
	1 202154289 202156509	na	A	Deletion	PTPRVP	Non syndromic sensorineural hearing loss	PM 21293372
	1 202166231 202200667	na	na	Insertion or deletion	LGR6	Non syndromic sensorineural hearing loss	PM 18451855
	1 202180141 202180231	na	na	Insertion	LGR6	Non syndromic sensorineural hearing loss	PM 22037309
	1 202288869 202289217	na	A	Deletion	LGR6	Non syndromic sensorineural hearing loss	PM 21293372
	1 202326236 202360056	na	na	Insertion or deletion	PPP1R12B	Non syndromic sensorineural hearing loss	PM 18451855
	1 202477261 202477711	na	na	Cn gain	PPP1R12B	Non syndromic sensorineural hearing loss	PM 19587683
	1 202527683 202550443	na	na	Gain	PPP1R12B	early passage human iPS cells	PM 21368824
	1 202534164 202550443	na	na	Gain	PPP1R12B	early passage human iPS cells	PM 21368824
	1 202571368 202571437	na	na	Insertion	SYT2	Non syndromic sensorineural hearing loss	PM 22037309
	1 202733471 202774818	na	na	Gain	KDM5B	early passage human iPS cells	PM 21368824
	1 202733471 202779443	na	na	Gain	KDM5B	early passage human iPS cells	PM 21368824
	1 202736815 202756392	na	na	Gain	KDM5B	early passage human iPS cells	PM 21368824
	1 202736815 202779443	na	na	Gain	KDM5B	early passage human iPS cells	PM 21368824
	1 202877964 202878059	na	na	Insertion	KLHL12	Non syndromic sensorineural hearing loss	PM 22037309
	1 203145450 203145515	na	na	Insertion	MYBPH	Non syndromic sensorineural hearing loss	PM 22037309
	1 203308142 203308237	na	na	Insertion	FMOD	Non syndromic sensorineural hearing loss	PM 22037309
	1 203322620 203323163	na	na	Cn loss	LOC100131747	Non syndromic sensorineural hearing loss	PM 19587683
	1 203641549 203641649	na	na	Insertion	ATP2B4	Non syndromic sensorineural hearing loss	PM 22037309
	1 203765769 203767389	na	na	Cn gain	ZC3H11A	Non syndromic sensorineural hearing loss	PM 19587683
	1 204120202 204120331	na	G	Deletion	ETNK2	Non syndromic sensorineural hearing loss	PM 21293372
	1 204225072 204225172	na	na	Insertion	PLEKHA6	Non syndromic sensorineural hearing loss	PM 22037309
	1 204390067 204390865	na	na	Cn gain	PIK3C2B	Non syndromic sensorineural hearing loss	PM 19587683
	1 204423947 204456317	na	na	Insertion or deletion	PIK3C2B	Non syndromic sensorineural hearing loss	PM 18451855
	1 204427915 204457500	na	na	Loss	PIK3C2B	early passage human iPS cells	PM 21368824
	1 204434611 204434706	na	na	Insertion	PIK3C2B	Non syndromic sensorineural hearing loss	PM 22037309
	1 204509851 204554565	na	na	Insertion or deletion	MDM4	Non syndromic sensorineural hearing loss	PM 18451855
	1 204523890 204556220	na	na	Insertion or deletion	MDM4	Non syndromic sensorineural hearing loss	PM 18451855
	1 204527052 204527152	na	na	Insertion	MDM4	Non syndromic sensorineural hearing loss	PM 22037309
	1 204535221 204569481	na	na	Insertion or deletion	MDM4	Non syndromic sensorineural hearing loss	PM 18451855
	1 204553575 204553655	na	na	Insertion	MDM4	Non syndromic sensorineural hearing loss	PM 22037309
	1 204554877 204554998	na	na	Insertion	MDM4	Non syndromic sensorineural hearing loss	PM 22037309
	1 204571606 204571685	na	na	Insertion	MDM4	Non syndromic sensorineural hearing loss	PM 22037309
	1 204621229 204645692	na	na	Insertion or deletion	LRRN2	Non syndromic sensorineural hearing loss	PM 18451855
	1 204639856 204639956	na	na	Insertion	LRRN2	Non syndromic sensorineural hearing loss	PM 22037309
	1 204824142 204824201	na	na	Insertion	NFASC	Non syndromic sensorineural hearing loss	PM 22037309
	1 204881305 204882282	na	T	Deletion	NFASC	Non syndromic sensorineural hearing loss	PM 21293372
	1 205056974 205057069	na	na	Insertion	RBBP5	Non syndromic sensorineural hearing loss	PM 22037309
	1 205275948 205276048	na	na	Insertion	NUAK2	Non syndromic sensorineural hearing loss	PM 22037309
	1 205421374 205421459	na	na	Insertion	BLACAT1	Non syndromic sensorineural hearing loss	PM 22037309
	1 205503314 205503371	na	na	Insertion	CDK18	Non syndromic sensorineural hearing loss	PM 22037309
	1 205716425 205716504	na	na	Insertion	NUCKS1	Non syndromic sensorineural hearing loss	PM 22037309
	1 205782105 205782164	na	na	Insertion	SLC41A1	Non syndromic sensorineural hearing loss	PM 22037309
	1 205847147 205847247	na	na	Insertion	LOC284581	Non syndromic sensorineural hearing loss	PM 22037309
	1 205907685 205912437	na	C	Deletion	SLC26A9	Non syndromic sensorineural hearing loss	PM 21293372
	1 205907791 205907891	na	na	Insertion	SLC26A9	Non syndromic sensorineural hearing loss	PM 22037309
	1 206278020 206278059	na	na	Insertion	C1orf186	Non syndromic sensorineural hearing loss	PM 22037309
	1 206641618 206641718	na	na	Insertion	IKBKE	Non syndromic sensorineural hearing loss	PM 22037309
	1 206647602 206647668	na	na	Insertion	IKBKE	Non syndromic sensorineural hearing loss	PM 22037309
	1 206682088 206682155	na	na	Insertion	RASSF5	Non syndromic sensorineural hearing loss	PM 22037309
	1 206684997 206700159	na	na	Loss	RASSF5	early passage human iPS cells	PM 21368824
	1 206687384 206698479	na	na	Loss	RASSF5	early passage human iPS cells	PM 21368824
	1 206690585 206722701	na	na	Insertion or deletion	RASSF5	Non syndromic sensorineural hearing loss	PM 18451855
	1 206889851 206889950	na	na	Insertion	MAPKAPK2	Non syndromic sensorineural hearing loss	PM 22037309
	1 207015733 207015823	na	na	Insertion	IL19	Non syndromic sensorineural hearing loss	PM 22037309
	1 207253865 207253965	na	na	Insertion	PFKFB2	Non syndromic sensorineural hearing loss	PM 22037309
	1 207579518 207579637	na	na	Insertion	LOC101929363	Non syndromic sensorineural hearing loss	PM 22037309
	1 207668188 207668288	na	na	Insertion	CR1	Non syndromic sensorineural hearing loss	PM 22037309
	1 207669875 207686818	na	na	Gain	CR1	early passage human iPS cells	PM 21368824
	1 207669983 207685328	na	na	Gain	CR1	early passage human iPS cells	PM 21368824
	1 207670462 207686818	na	na	Gain	CR1	early passage human iPS cells	PM 21368824
	1 207671725 207688452	na	na	Gain	CR1	early passage human iPS cells	PM 21368824
	1 207707414 207736947	na	na	Gain	CR1	early passage human iPS cells	PM 21368824
	1 207707414 207751559	na	na	Gain	CR1	early passage human iPS cells	PM 21368824
	1 207707414 207755345	na	na	Gain	CR1	early passage human iPS cells	PM 21368824
	1 207707414 207756895	na	na	Gain	CR1	early passage human iPS cells	PM 21368824
	1 207707414 207766791	na	na	Gain	CR1	early passage human iPS cells	PM 21368824
	1 207828025 207828125	na	na	Insertion	CD46P1	Non syndromic sensorineural hearing loss	PM 22037309
	1 208222923 208223023	na	na	Insertion	PLXNA2	Non syndromic sensorineural hearing loss	PM 22037309
	1 208361926 208362245	na	T	Deletion	PLXNA2	Non syndromic sensorineural hearing loss	PM 21293372
	1 209807505 209807586	na	na	Insertion	LAMB3	Non syndromic sensorineural hearing loss	PM 22037309
	1 209896701 209896801	na	na	Insertion	HSD11B1	Non syndromic sensorineural hearing loss	PM 22037309
	1 209947142 209947242	na	na	Insertion	TRAF3IP3	Non syndromic sensorineural hearing loss	PM 22037309
	1 210029304 210029346	na	na	Insertion	DIEXF	Non syndromic sensorineural hearing loss	PM 22037309
	1 210031683 210032451	na	G	Deletion	DIEXF	Non syndromic sensorineural hearing loss	PM 21293372
	1 210115436 210115520	na	na	Insertion	SYT14	Non syndromic sensorineural hearing loss	PM 22037309
	1 210146875 210147973	na	A	Deletion	SYT14	Non syndromic sensorineural hearing loss	PM 21293372
	1 210165629 210167156	na	A	Deletion	SYT14	Non syndromic sensorineural hearing loss	PM 21293372
	1 210537758 210539239	na	A	Deletion	HHAT	Non syndromic sensorineural hearing loss	PM 21293372
	1 210543201 210577957	na	na	Insertion or deletion	HHAT	Non syndromic sensorineural hearing loss	PM 18451855
	1 210611231 210611331	na	na	Insertion	HHAT	Non syndromic sensorineural hearing loss	PM 22037309
	1 210949234 210949334	na	na	Insertion	KCNH1	Non syndromic sensorineural hearing loss	PM 22037309
	1 210984154 210995854	na	na	Gain	KCNH1	early passage human iPS cells	PM 21368824
	1 211013459 211066430	na	na	Gain	KCNH1	early passage human iPS cells	PM 21368824
	1 211038780 211066430	na	na	Gain	KCNH1	early passage human iPS cells	PM 21368824
	1 211038780 211071066	na	na	Gain	KCNH1	early passage human iPS cells	PM 21368824
	1 211039354 211040189	na	G	Deletion	KCNH1	Non syndromic sensorineural hearing loss	PM 21293372
	1 211068991 211080288	na	C	Deletion	KCNH1	Non syndromic sensorineural hearing loss	PM 21293372
	1 211651746 211651846	na	na	Insertion	RD3	Non syndromic sensorineural hearing loss	PM 22037309
	1 211967733 211970392	na	T	Deletion	LPGAT1	Non syndromic sensorineural hearing loss	PM 21293372
	1 212040353 212041721	na	T	Deletion	LPGAT1	Non syndromic sensorineural hearing loss	PM 21293372
	1 212164578 212164728	na	na	Insertion	INTS7	Non syndromic sensorineural hearing loss	PM 22037309
	1 212210381 212210481	na	na	Insertion	INTS7	Non syndromic sensorineural hearing loss	PM 22037309
	1 212458512 212458612	na	na	Insertion	PPP2R5A	Non syndromic sensorineural hearing loss	PM 22037309
	1 212865574 212865674	na	na	Insertion	BATF3	Non syndromic sensorineural hearing loss	PM 22037309
	1 212908770 212908860	na	na	Insertion	NSL1	Non syndromic sensorineural hearing loss	PM 22037309
	1 212975550 212975700	na	na	Insertion	TATDN3	Non syndromic sensorineural hearing loss	PM 22037309
	1 213034818 213034918	na	na	Insertion	FLVCR1	Non syndromic sensorineural hearing loss	PM 22037309
	1 213136703 213136906	na	na	Insertion	VASH2	Non syndromic sensorineural hearing loss	PM 22037309
	1 213261350 213261404	na	C	Deletion	RPS6KC1	Non syndromic sensorineural hearing loss	PM 21293372
	1 213323122 213323237	na	na	Loss	RPS6KC1	Autism	PM 21865298
	1 213411804 213411904	na	na	Insertion	RPS6KC1	Non syndromic sensorineural hearing loss	PM 22037309
	1 213859178 213859264	na	na	Insertion	PROX1 AS1	Non syndromic sensorineural hearing loss	PM 22037309
	1 213914685 213979490	na	na	Loss	PROX1 AS1	Schizophrenia	PM 23813976
	1 213964941 213965035	na	na	Insertion	PROX1 AS1	Non syndromic sensorineural hearing loss	PM 22037309
	1 214054662 214054756	na	na	Insertion	PROX1 AS1	Non syndromic sensorineural hearing loss	PM 22037309
	1 214097810 214097910	na	na	Insertion	PROX1 AS1	Non syndromic sensorineural hearing loss	PM 22037309
	1 214173239 214173333	na	na	Insertion	PROX1	Non syndromic sensorineural hearing loss	PM 22037309
	1 214486052 214486137	na	na	Insertion	SMYD2	Non syndromic sensorineural hearing loss	PM 22037309
	1 214556377 214588255	na	na	Insertion or deletion	PTPN14	Non syndromic sensorineural hearing loss	PM 18451855
	1 214558846 214593865	na	na	Insertion or deletion	PTPN14	Non syndromic sensorineural hearing loss	PM 18451855
	1 214559027 214585973	na	na	Insertion or deletion	PTPN14	Non syndromic sensorineural hearing loss	PM 18451855
	1 214569228 214592234	na	na	Insertion or deletion	PTPN14	Non syndromic sensorineural hearing loss	PM 18451855
	1 214569523 214603936	na	na	Insertion or deletion	PTPN14	Non syndromic sensorineural hearing loss	PM 18451855
	1 214574308 214574408	na	na	Insertion	PTPN14	Non syndromic sensorineural hearing loss	PM 22037309
	1 214776532 214837914	na	na	Duplication	CENPF	Primary hepatocellular	PM 22912832
	1 215336581 215336646	na	T	Deletion	KCNK2	Non syndromic sensorineural hearing loss	PM 21293372
	1 215384703 215384803	na	na	Insertion	KCNK2	Non syndromic sensorineural hearing loss	PM 22037309
	1 215795707 215795807	na	na	Insertion	KCTD3	Non syndromic sensorineural hearing loss	PM 22037309
	1 215820697 215821000	na	G	Deletion	USH2A	Non syndromic sensorineural hearing loss	PM 21293372
	1 215979330 215979409	na	na	Insertion	USH2A	Non syndromic sensorineural hearing loss	PM 22037309
	1 215984134 215984447	na	T	Deletion	USH2A	Non syndromic sensorineural hearing loss	PM 21293372
	1 216148000 216177160	na	na	Duplication	USH2A	Non syndromic sensorineural hearing loss	PM 19212409
	1 216149286 216149520	na	T	Deletion	USH2A	Non syndromic sensorineural hearing loss	PM 21293372
	1 216249111 216255217	na	C	Deletion	USH2A	Non syndromic sensorineural hearing loss	PM 21293372
	1 216312251 216313108	na	C	Deletion	USH2A	Non syndromic sensorineural hearing loss	PM 21293372
	1 216470891 216471095	na	A	Deletion	USH2A	Non syndromic sensorineural hearing loss	PM 21293372
	1 216484536 216488212	na	C	Deletion	USH2A	Non syndromic sensorineural hearing loss	PM 21293372
	1 216689809 216689909	na	na	Insertion	ESRRG	Non syndromic sensorineural hearing loss	PM 22037309
	1 216786037 216830626	na	na	Insertion or deletion	ESRRG	Non syndromic sensorineural hearing loss	PM 18451855
	1 216852536 216852856	na	A	Deletion	ESRRG	Non syndromic sensorineural hearing loss	PM 21293372
	1 217601945 217602035	na	na	Insertion	GPATCH2	Non syndromic sensorineural hearing loss	PM 22037309
	1 217776424 217776524	na	na	Insertion	GPATCH2	Non syndromic sensorineural hearing loss	PM 22037309
	1 217908844 217924869	na	na	Loss	SPATA17	Schizophrenia	PM 23813976
	1 217913528 217913683	na	na	Insertion	SPATA17	Non syndromic sensorineural hearing loss	PM 22037309
	1 217989931 217990249	na	T	Deletion	SPATA17	Non syndromic sensorineural hearing loss	PM 21293372
	1 218475070 218508856	na	na	Insertion or deletion	RRP15	Non syndromic sensorineural hearing loss	PM 18451855
	1 218502996 218507504	na	A	Deletion	RRP15	Non syndromic sensorineural hearing loss	PM 21293372
	1 218509461 218509561	na	na	Insertion	RRP15	Non syndromic sensorineural hearing loss	PM 22037309
	1 218535878 218535978	na	na	Insertion	TGFB2	Non syndromic sensorineural hearing loss	PM 22037309
	1 218569566 218570205	na	A	Deletion	TGFB2	Non syndromic sensorineural hearing loss	PM 21293372
	1 218582647 218616840	na	na	Insertion or deletion	TGFB2	Non syndromic sensorineural hearing loss	PM 18451855
	1 219019094 219019194	na	na	Insertion	NXNP1	Non syndromic sensorineural hearing loss	PM 22037309
	1 219030698 219030798	na	na	Insertion	NXNP1	Non syndromic sensorineural hearing loss	PM 22037309
	1 219057481 219057545	na	G	Deletion	NXNP1	Non syndromic sensorineural hearing loss	PM 21293372
	1 219263452 219263552	na	na	Insertion	LYPLAL1 AS1	Non syndromic sensorineural hearing loss	PM 22037309
	1 219339368 219339468	na	na	Insertion	LYPLAL1 AS1	Non syndromic sensorineural hearing loss	PM 22037309
	1 220100766 220101098	na	G	Deletion	SLC30A10	Non syndromic sensorineural hearing loss	PM 21293372
	1 220191720 220191820	na	na	Insertion	EPRS	Non syndromic sensorineural hearing loss	PM 22037309
	1 220440565 220447122	na	C	Deletion	RAB3GAP2	Non syndromic sensorineural hearing loss	PM 21293372
	1 220440788 220447160	na	T	Deletion	RAB3GAP2	Non syndromic sensorineural hearing loss	PM 21293372
	1 220441714 220447786	na	na	High copy gain	RAB3GAP2	Non syndromic sensorineural hearing loss	PM 19587683
	1 220726167 220726257	na	na	Insertion	MARK1	Non syndromic sensorineural hearing loss	PM 22037309
	1 220933699 220943213	na	na	Gain	2018-03-02	Autism	PM 21865298
	1 221279306 221279391	na	na	Insertion	LOC101929750	Non syndromic sensorineural hearing loss	PM 22037309
	1 222018416 222018516	na	na	Insertion	LOC101929771	Non syndromic sensorineural hearing loss	PM 22037309
	1 222061106 222061206	na	na	Insertion	LOC101929771	Non syndromic sensorineural hearing loss	PM 22037309
	1 222290755 222290820	na	na	Insertion	QRSL1P2	Non syndromic sensorineural hearing loss	PM 22037309
	1 222301898 222301930	na	na	Insertion	QRSL1P2	Non syndromic sensorineural hearing loss	PM 22037309
	1 222313725 222314201	na	T	Deletion	QRSL1P2	Non syndromic sensorineural hearing loss	PM 21293372
	1 222325947 222326654	na	A	Deletion	QRSL1P2	Non syndromic sensorineural hearing loss	PM 21293372
	1 222394521 222408636	na	na	Gain	QRSL1P2	early passage human iPS cells	PM 21368824
	1 222394521 222412809	na	na	Gain	QRSL1P2	early passage human iPS cells	PM 21368824
	1 222403566 222403666	na	na	Insertion	QRSL1P2	Non syndromic sensorineural hearing loss	PM 22037309
	1 222852436 222852627	na	na	Insertion	AIDA	Non syndromic sensorineural hearing loss	PM 22037309
	1 222882293 222884930	na	T	Deletion	AIDA	Non syndromic sensorineural hearing loss	PM 21293372
	1 223103070 223138343	na	na	Insertion or deletion	DISP1	Non syndromic sensorineural hearing loss	PM 18451855
	1 223315611 223315711	na	na	Insertion	TLR5	Non syndromic sensorineural hearing loss	PM 22037309
	1 223411024 223411338	na	A	Deletion	SUSD4	Non syndromic sensorineural hearing loss	PM 21293372
	1 223416964 223417064	na	na	Insertion	SUSD4	Non syndromic sensorineural hearing loss	PM 22037309
	1 223740095 223740422	na	T	Deletion	CAPN8	Non syndromic sensorineural hearing loss	PM 21293372
	1 223828938 223829256	na	T	Deletion	CAPN8	Non syndromic sensorineural hearing loss	PM 21293372
	1 223983866 223983944	na	na	Insertion	TP53BP2	Non syndromic sensorineural hearing loss	PM 22037309
	1 224208405 224221291	na	na	Loss	LOC101060626	Schizophrenia	PM 23813976
	1 224371126 224371201	na	na	Insertion	DEGS1	Non syndromic sensorineural hearing loss	PM 22037309
	1 224413180 224417019	na	na	Cn loss	LOC101927164	Non syndromic sensorineural hearing loss	PM 19587683
	1 224545941 224546066	na	na	Insertion	CNIH4	Non syndromic sensorineural hearing loss	PM 22037309
	1 224610627 224610678	na	A	Deletion	WDR26	Non syndromic sensorineural hearing loss	PM 21293372
	1 224641867 224641967	na	na	Insertion	LOC101928291	Non syndromic sensorineural hearing loss	PM 22037309
	1 224794162 224794198	na	na	Insertion	CNIH3	Non syndromic sensorineural hearing loss	PM 22037309
	1 224803654 224803727	na	na	Insertion	CNIH3	Non syndromic sensorineural hearing loss	PM 22037309
	1 224811106 224811176	na	na	Insertion	CNIH3	Non syndromic sensorineural hearing loss	PM 22037309
	1 225181646 225181746	na	na	Insertion	DNAH14	Non syndromic sensorineural hearing loss	PM 22037309
	1 225518676 225518967	na	A	Deletion	DNAH14	Non syndromic sensorineural hearing loss	PM 21293372
	1 225529578 225548901	na	C	Deletion	DNAH14	Non syndromic sensorineural hearing loss	PM 21293372
	1 225548887 225549205	na	A	Deletion	DNAH14	Non syndromic sensorineural hearing loss	PM 21293372
	1 225783079 225783179	na	na	Insertion	ENAH	Non syndromic sensorineural hearing loss	PM 22037309
	1 225968319 225968419	na	na	Insertion	SRP9	Non syndromic sensorineural hearing loss	PM 22037309
	1 225996199 225996431	na	na	Insertion	EPHX1	Non syndromic sensorineural hearing loss	PM 22037309
	1 226004049 226004118	na	A	Deletion	EPHX1	Non syndromic sensorineural hearing loss	PM 21293372
	1 226428468 226428836	na	C	Deletion	LIN9	Non syndromic sensorineural hearing loss	PM 21293372
	1 226494625 226494714	na	na	Insertion	LIN9	Non syndromic sensorineural hearing loss	PM 22037309
	1 226497944 226498536	na	G	Deletion	LIN9	Non syndromic sensorineural hearing loss	PM 21293372
	1 226768073 226768158	na	na	Insertion	C1orf95	Non syndromic sensorineural hearing loss	PM 22037309
	1 226772506 226772639	na	C	Deletion	C1orf95	Non syndromic sensorineural hearing loss	PM 21293372
	1 226822367 226824562	na	G	Deletion	ITPKB	Non syndromic sensorineural hearing loss	PM 21293372
	1 226867681 226867771	na	na	Insertion	ITPKB	Non syndromic sensorineural hearing loss	PM 22037309
	1 226881428 226881764	na	A	Deletion	ITPKB	Non syndromic sensorineural hearing loss	PM 21293372
	1 226885450 226886738	na	A	Deletion	ITPKB	Non syndromic sensorineural hearing loss	PM 21293372
	1 227089316 227097121	na	na	Cn loss	ADCK3	Non syndromic sensorineural hearing loss	PM 19587683
	1 227128004 227128054	na	na	Insertion	ADCK3	Non syndromic sensorineural hearing loss	PM 22037309
	1 227167997 227168054	na	T	Deletion	ADCK3	Non syndromic sensorineural hearing loss	PM 21293372
	1 227180675 227180765	na	na	Insertion	CDC42BPA	Non syndromic sensorineural hearing loss	PM 22037309
	1 227351264 227351412	na	A	Deletion	CDC42BPA	Non syndromic sensorineural hearing loss	PM 21293372
	1 227440011 227440385	na	A	Deletion	CDC42BPA	Non syndromic sensorineural hearing loss	PM 21293372
	1 227599323 227599563	na	A	Deletion	LOC100130466	Non syndromic sensorineural hearing loss	PM 21293372
	1 227602197 227602271	na	na	Insertion	LOC100130466	Non syndromic sensorineural hearing loss	PM 22037309
	1 227946927 227947027	na	na	Insertion	SNAP47	Non syndromic sensorineural hearing loss	PM 22037309
	1 228199261 228200497	na	G	Deletion	WNT3A	Non syndromic sensorineural hearing loss	PM 21293372
	1 228199469 228200805	na	C	Deletion	WNT3A	Non syndromic sensorineural hearing loss	PM 21293372
	1 228219928 228220013	na	na	Insertion	WNT3A	Non syndromic sensorineural hearing loss	PM 22037309
	1 228259743 228259843	na	na	Insertion	LOC100506571	Non syndromic sensorineural hearing loss	PM 22037309
	1 228340667 228340712	na	na	Insertion	GJC2	Non syndromic sensorineural hearing loss	PM 22037309
	1 228451708 228451802	na	na	Insertion	OBSCN	Non syndromic sensorineural hearing loss	PM 22037309
	1 228517717 228517825	na	T	Deletion	OBSCN	Non syndromic sensorineural hearing loss	PM 21293372
	1 228593862 228593927	na	na	Insertion	TRIM11	Non syndromic sensorineural hearing loss	PM 22037309
	1 228701341 228701430	na	na	Insertion	BTNL10	Non syndromic sensorineural hearing loss	PM 22037309
	1 228959918 228960151	na	na	Insertion	LOC100421842	Non syndromic sensorineural hearing loss	PM 22037309
	1 228963392 228997287	na	na	Insertion or deletion	LOC100421842	Non syndromic sensorineural hearing loss	PM 18451855
	1 229413296 229413419	na	G	Deletion	RAB4A	Non syndromic sensorineural hearing loss	PM 21293372
	1 229422569 229422669	na	na	Insertion	RAB4A	Non syndromic sensorineural hearing loss	PM 22037309
	1 229601999 229612660	na	C	Deletion	NUP133	Non syndromic sensorineural hearing loss	PM 21293372
	1 229666564 229666664	na	na	Insertion	ABCB10	Non syndromic sensorineural hearing loss	PM 22037309
	1 229731572 229739650	na	na	Gain	TAF5L	Autism	PM 21865298
	1 230288408 230288508	na	na	Insertion	GALNT2	Non syndromic sensorineural hearing loss	PM 22037309
	1 230489741 230490069	na	C	Deletion	PGBD5	Non syndromic sensorineural hearing loss	PM 21293372
	1 230525213 230526874	na	C	Deletion	PGBD5	Non syndromic sensorineural hearing loss	PM 21293372
	1 230525245 230526864	na	G	Deletion	PGBD5	Non syndromic sensorineural hearing loss	PM 21293372
	1 230529672 230529716	na	na	Insertion	PGBD5	Non syndromic sensorineural hearing loss	PM 22037309
	1 230838285 230838380	na	na	Insertion	AGT	Non syndromic sensorineural hearing loss	PM 22037309
	1 230842152 230842466	na	G	Deletion	AGT	Non syndromic sensorineural hearing loss	PM 21293372
	1 230883213 230883313	na	na	Insertion	CAPN9	Non syndromic sensorineural hearing loss	PM 22037309
	1 230903198 230903390	na	G	Deletion	CAPN9	Non syndromic sensorineural hearing loss	PM 21293372
	1 231133297 231133392	na	na	Insertion	ARV1	Non syndromic sensorineural hearing loss	PM 22037309
	1 231176426 231176526	na	na	Insertion	FAM89A	Non syndromic sensorineural hearing loss	PM 22037309
	1 231349023 231349103	na	na	Insertion	TRIM67	Non syndromic sensorineural hearing loss	PM 22037309
	1 231545634 231545734	na	na	Insertion	EGLN1	Non syndromic sensorineural hearing loss	PM 22037309
	1 231824002 231824102	na	na	Insertion	TSNAX DISC1	Non syndromic sensorineural hearing loss	PM 22037309
	1 231898201 231922280	na	na	Insertion or deletion	TSNAX DISC1	Non syndromic sensorineural hearing loss	PM 18451855
	1 231926981 231927087	na	A	Deletion	TSNAX DISC1	Non syndromic sensorineural hearing loss	PM 21293372
	1 231931756 231932087	na	T	Deletion	TSNAX DISC1	Non syndromic sensorineural hearing loss	PM 21293372
	1 232016517 232019178	na	na	Cn loss	TSNAX DISC1	Non syndromic sensorineural hearing loss	PM 19587683
	1 232149924 232150341	na	T	Deletion	TSNAX DISC1	Non syndromic sensorineural hearing loss	PM 21293372
	1 232580921 232591459	na	na	Insertion or deletion	SIPA1L2	Non syndromic sensorineural hearing loss	PM 18451855
	1 232583561 232599418	na	na	Insertion or deletion	SIPA1L2	Non syndromic sensorineural hearing loss	PM 18451855
	1 232584562 232597814	na	na	Insertion or deletion	SIPA1L2	Non syndromic sensorineural hearing loss	PM 18451855
	1 232584814 232604408	na	na	Insertion or deletion	SIPA1L2	Non syndromic sensorineural hearing loss	PM 18451855
	1 232584853 232604168	na	na	Insertion or deletion	SIPA1L2	Non syndromic sensorineural hearing loss	PM 18451855
	1 232587551 232587777	na	na	Insertion	SIPA1L2	Non syndromic sensorineural hearing loss	PM 22037309
	1 232653825 232654135	na	A	Deletion	SIPA1L2	Non syndromic sensorineural hearing loss	PM 21293372
	1 232947387 232947487	na	na	Insertion	MAP10	Non syndromic sensorineural hearing loss	PM 22037309
	1 233103480 233103580	na	na	Insertion	NTPCR	Non syndromic sensorineural hearing loss	PM 22037309
	1 233140248 233140348	na	na	Insertion	PCNXL2	Non syndromic sensorineural hearing loss	PM 22037309
	1 233188505 233222567	na	na	Insertion or deletion	PCNXL2	Non syndromic sensorineural hearing loss	PM 18451855
	1 233285692 233300068	na	na	Insertion or deletion	PCNXL2	Non syndromic sensorineural hearing loss	PM 18451855
	1 233321619 233322758	na	G	Deletion	PCNXL2	Non syndromic sensorineural hearing loss	PM 21293372
	1 233365022 233365206	na	A	Deletion	PCNXL2	Non syndromic sensorineural hearing loss	PM 21293372
	1 233490090 233490190	na	na	Insertion	KIAA1804	Non syndromic sensorineural hearing loss	PM 22037309
	1 234070393 234070552	na	na	Insertion	SLC35F3	Non syndromic sensorineural hearing loss	PM 22037309
	1 234084664 234103390	na	na	Loss	SLC35F3	early passage human iPS cells	PM 21368824
	1 234084664 234111389	na	na	Loss	SLC35F3	early passage human iPS cells	PM 21368824
	1 234084664 234149200	na	na	Loss	SLC35F3	early passage human iPS cells	PM 21368824
	1 234090580 234111389	na	na	Loss	SLC35F3	early passage human iPS cells	PM 21368824
	1 234121198 234121536	na	C	Deletion	SLC35F3	Non syndromic sensorineural hearing loss	PM 21293372
	1 234121214 234121552	na	G	Deletion	SLC35F3	Non syndromic sensorineural hearing loss	PM 21293372
	1 234268581 234268785	na	C	Deletion	SLC35F3	Non syndromic sensorineural hearing loss	PM 21293372
	1 234345903 234346452	na	A	Deletion	SLC35F3	Non syndromic sensorineural hearing loss	PM 21293372
	1 234348675 234349772	na	T	Deletion	SLC35F3	Non syndromic sensorineural hearing loss	PM 21293372
	1 234429496 234432673	na	A	Deletion	SLC35F3	Non syndromic sensorineural hearing loss	PM 21293372
	1 234509211 234509537	na	A	Deletion	LOC101927765	Non syndromic sensorineural hearing loss	PM 21293372
	1 234516282 234516382	na	na	Insertion	COA6	Non syndromic sensorineural hearing loss	PM 22037309
	1 234562257 234562407	na	na	Insertion	TARBP1	Non syndromic sensorineural hearing loss	PM 22037309
	1 234866416 234866448	na	na	Insertion	LINC01132	Non syndromic sensorineural hearing loss	PM 22037309
	1 235332527 235376780	na	na	Insertion or deletion	ARID4B	Non syndromic sensorineural hearing loss	PM 18451855
	1 235333993 235345777	na	na	Loss	ARID4B	Schizophrenia	PM 23813976
	1 235420602 235420702	na	na	Insertion	ARID4B	Non syndromic sensorineural hearing loss	PM 22037309
	1 236014314 236014670	na	na	Cn gain	LYST	Non syndromic sensorineural hearing loss	PM 19587683
	1 236040007 236040216	na	A	Deletion	LYST	Non syndromic sensorineural hearing loss	PM 21293372
	1 236167640 236167725	na	na	Insertion	NID1	Non syndromic sensorineural hearing loss	PM 22037309
	1 236275849 236275949	na	na	Insertion	LOC343508	Non syndromic sensorineural hearing loss	PM 22037309
	1 236311521 236311621	na	na	Insertion	GPR137B	Non syndromic sensorineural hearing loss	PM 22037309
	1 236333860 236336139	na	na	Insertion or deletion	GPR137B	Non syndromic sensorineural hearing loss	PM 18451855
	1 236383312 236384744	na	A	Deletion	GPR137B	Non syndromic sensorineural hearing loss	PM 21293372
	1 236393398 236393481	na	na	Insertion	GPR137B	Non syndromic sensorineural hearing loss	PM 22037309
	1 236418262 236418398	na	A	Deletion	ERO1LB	Non syndromic sensorineural hearing loss	PM 21293372
	1 236760027 236767813	na	T	Deletion	HEATR1	Non syndromic sensorineural hearing loss	PM 21293372
	1 236893915 236894015	na	na	Insertion	ACTN2	Non syndromic sensorineural hearing loss	PM 22037309
	1 236918930 236919873	na	T	Deletion	ACTN2	Non syndromic sensorineural hearing loss	PM 21293372
	1 237049465 237049565	na	na	Insertion	MTR	Non syndromic sensorineural hearing loss	PM 22037309
	1 237205701 237997288	na	na	Gain	RYR2	Sudden cardiac death	PM 19188705
	1 237277197 237277297	na	na	Insertion	RYR2	Non syndromic sensorineural hearing loss	PM 22037309
	1 237823682 237847789	na	na	Loss	RYR2	early passage human iPS cells	PM 21368824
	1 237842440 237859886	na	na	Loss	RYR2	early passage human iPS cells	PM 21368824
	1 237842440 237864971	na	na	Loss	RYR2	early passage human iPS cells	PM 21368824
	1 237846780 237848485	na	G	Deletion	RYR2	Non syndromic sensorineural hearing loss	PM 21293372
	1 238024304 238024404	na	na	Insertion	LOC100130331	Non syndromic sensorineural hearing loss	PM 22037309
	1 238952828 238970020	na	na	Loss	MIPEPP2	Schizophrenia	PM 23813976
	1 238982657 238982756	na	na	Insertion	MIPEPP2	Non syndromic sensorineural hearing loss	PM 22037309
	1 239020297 239020397	na	na	Insertion	MIPEPP2	Non syndromic sensorineural hearing loss	PM 22037309
	1 239216479 239216804	na	T	Deletion	RPL39P10	Non syndromic sensorineural hearing loss	PM 21293372
	1 239555899 239555968	na	na	Insertion	CHRM3	Non syndromic sensorineural hearing loss	PM 22037309
	1 239652848 239653111	na	A	Deletion	CHRM3	Non syndromic sensorineural hearing loss	PM 21293372
	1 239658746 239658846	na	na	Insertion	CHRM3	Non syndromic sensorineural hearing loss	PM 22037309
	1 239695670 239695721	na	G	Deletion	CHRM3	Non syndromic sensorineural hearing loss	PM 21293372
	1 239736429 239736509	na	na	Insertion	CHRM3	Non syndromic sensorineural hearing loss	PM 22037309
	1 239758313 239758675	na	C	Deletion	CHRM3	Non syndromic sensorineural hearing loss	PM 21293372
	1 239847282 239847382	na	na	Insertion	CHRM3	Non syndromic sensorineural hearing loss	PM 22037309
	1 239975345 239975611	na	T	Deletion	CHRM3	Non syndromic sensorineural hearing loss	PM 21293372
	1 240136449 240136549	na	na	Insertion	LOC128136	Non syndromic sensorineural hearing loss	PM 22037309
	1 240435563 240435663	na	na	Insertion	FMN2	Non syndromic sensorineural hearing loss	PM 22037309
	1 240472713 240486440	na	na	Insertion or deletion	FMN2	Non syndromic sensorineural hearing loss	PM 18451855
	1 240665208 240665420	na	A	Deletion	GREM2	Non syndromic sensorineural hearing loss	PM 21293372
	1 241025267 241025367	na	na	Insertion	RGS7	Non syndromic sensorineural hearing loss	PM 22037309
	1 241114167 241347508	na	na	Duplication	RGS7	Schizophrenia	PM 20967226
	1 241115351 241294758	na	na	Duplication	RGS7	Schizophrenia	PM 20967226
	1 241115351 241324674	na	na	Duplication	RGS7	Schizophrenia	PM 20967226
	1 241116497 241294758	na	na	Duplication	RGS7	Schizophrenia	PM 20967226
	1 241119776 241150557	na	na	Insertion or deletion	RGS7	Non syndromic sensorineural hearing loss	PM 18451855
	1 241122153 241324674	na	na	Duplication	RGS7	Schizophrenia	PM 20967226
	1 241194394 241195834	na	G	Deletion	RGS7	Non syndromic sensorineural hearing loss	PM 21293372
	1 241230465 241359750	na	na	Loss	RGS7	Schizophrenia	PM 23813976
	1 241287717 241319611	na	na	Insertion or deletion	RGS7	Non syndromic sensorineural hearing loss	PM 18451855
	1 241324686 241409849	na	na	Gain	RGS7	Schizophrenia	PM 23813976
	1 241451891 241483628	na	na	Insertion or deletion	RGS7	Non syndromic sensorineural hearing loss	PM 18451855
	1 241491978 241492274	na	T	Deletion	RGS7	Non syndromic sensorineural hearing loss	PM 21293372
	1 241700591 241734798	na	na	Insertion or deletion	KMO	Non syndromic sensorineural hearing loss	PM 18451855
	1 241777961 241778061	na	na	Insertion	OPN3	Non syndromic sensorineural hearing loss	PM 22037309
	1 241835594 241835653	na	na	Insertion	WDR64	Non syndromic sensorineural hearing loss	PM 22037309
	1 241849368 241850364	na	C	Deletion	WDR64	Non syndromic sensorineural hearing loss	PM 21293372
	1 241952471 241964722	na	na	Gain	WDR64	early passage human iPS cells	PM 21368824
	1 242455437 242470619	na	na	Insertion or deletion	PLD5	Non syndromic sensorineural hearing loss	PM 18451855
	1 242652818 242652918	na	na	Insertion	PLD5	Non syndromic sensorineural hearing loss	PM 22037309
	1 243289833 243310393	na	na	Insertion or deletion	CEP170	Non syndromic sensorineural hearing loss	PM 18451855
	1 243294681 243323280	na	na	Insertion or deletion	CEP170	Non syndromic sensorineural hearing loss	PM 18451855
	1 243296539 243310784	na	na	Insertion or deletion	CEP170	Non syndromic sensorineural hearing loss	PM 18451855
	1 243303819 243311530	na	na	Insertion or deletion	CEP170	Non syndromic sensorineural hearing loss	PM 18451855
	1 243306055 243325697	na	na	Insertion or deletion	CEP170	Non syndromic sensorineural hearing loss	PM 18451855
	1 243354405 243399139	na	na	Insertion or deletion	CEP170	Non syndromic sensorineural hearing loss	PM 18451855
	1 243415694 243416165	na	A	Deletion	CEP170	Non syndromic sensorineural hearing loss	PM 21293372
	1 243553981 243554055	na	G	Deletion	SDCCAG8	Non syndromic sensorineural hearing loss	PM 21293372
	1 243589491 243589591	na	na	Insertion	SDCCAG8	Non syndromic sensorineural hearing loss	PM 22037309
	1 243601536 243621162	na	na	Insertion or deletion	SDCCAG8	Non syndromic sensorineural hearing loss	PM 18451855
	1 243719297 243719397	na	na	Insertion	AKT3	Non syndromic sensorineural hearing loss	PM 22037309
	1 243739951 243766973	na	na	Insertion or deletion	AKT3	Non syndromic sensorineural hearing loss	PM 18451855
	1 243844782 243844918	na	T	Deletion	AKT3	Non syndromic sensorineural hearing loss	PM 21293372
	1 243892308 243892399	na	G	Deletion	AKT3	Non syndromic sensorineural hearing loss	PM 21293372
	1 243912324 243912568	na	C	Deletion	AKT3	Non syndromic sensorineural hearing loss	PM 21293372
	1 243912324 243912629	na	C	Deletion	AKT3	Non syndromic sensorineural hearing loss	PM 21293372
	1 243925671 243925805	na	A	Deletion	AKT3	Non syndromic sensorineural hearing loss	PM 21293372
	1 243925678 243925813	na	G	Deletion	AKT3	Non syndromic sensorineural hearing loss	PM 21293372
	1 244079502 244079534	na	na	Insertion	LOC339529	Non syndromic sensorineural hearing loss	PM 22037309
	1 244102295 244102380	na	T	Deletion	LOC339529	Non syndromic sensorineural hearing loss	PM 21293372
	1 244146527 244183712	na	na	Insertion or deletion	LOC339529	Non syndromic sensorineural hearing loss	PM 18451855
	1 244163286 244193001	na	na	Insertion or deletion	LOC339529	Non syndromic sensorineural hearing loss	PM 18451855
	1 244173624 244186073	na	na	Insertion or deletion	LOC339529	Non syndromic sensorineural hearing loss	PM 18451855
	1 244176096 244203386	na	na	Insertion or deletion	LOC339529	Non syndromic sensorineural hearing loss	PM 18451855
	1 244192588 244192778	na	C	Deletion	LOC339529	Non syndromic sensorineural hearing loss	PM 21293372
	1 244221662 244221997	na	A	Deletion	ZBTB18	Non syndromic sensorineural hearing loss	PM 21293372
	1 244565799 244565868	na	na	Insertion	TGIF2P1	Non syndromic sensorineural hearing loss	PM 22037309
	1 244723620 244723809	na	A	Deletion	C1orf101	Non syndromic sensorineural hearing loss	PM 21293372
	1 244749795 244752090	na	na	Duplication	C1orf101	Non syndromic sensorineural hearing loss	PM 21293372
	1 244838663 244838763	na	na	Insertion	DESI2	Non syndromic sensorineural hearing loss	PM 22037309
	1 245163800 245208167	na	na	Insertion or deletion	EFCAB2	Non syndromic sensorineural hearing loss	PM 18451855
	1 245248306 245248406	na	na	Insertion	EFCAB2	Non syndromic sensorineural hearing loss	PM 22037309
	1 245252842 245253723	na	C	Deletion	EFCAB2	Non syndromic sensorineural hearing loss	PM 21293372
	1 245327346 245360574	na	na	Insertion or deletion	KIF26B	Non syndromic sensorineural hearing loss	PM 18451855
	1 245331984 245332084	na	na	Insertion	KIF26B	Non syndromic sensorineural hearing loss	PM 22037309
	1 245358786 245359839	na	G	Deletion	KIF26B	Non syndromic sensorineural hearing loss	PM 21293372
	1 245392382 245416197	na	na	Insertion or deletion	KIF26B	Non syndromic sensorineural hearing loss	PM 18451855
	1 245636153 245636383	na	A	Deletion	KIF26B	Non syndromic sensorineural hearing loss	PM 21293372
	1 245720380 245721825	na	A	Deletion	KIF26B	Non syndromic sensorineural hearing loss	PM 21293372
	1 245778888 245798810	na	T	Deletion	KIF26B	Non syndromic sensorineural hearing loss	PM 21293372
	1 245812328 245814893	na	G	Deletion	KIF26B	Non syndromic sensorineural hearing loss	PM 21293372
	1 245917085 245923138	na	A	Deletion	SMYD3	Non syndromic sensorineural hearing loss	PM 21293372
	1 245989318 245989479	na	na	Insertion	SMYD3	Non syndromic sensorineural hearing loss	PM 22037309
	1 246025673 246025727	na	T	Deletion	SMYD3	Non syndromic sensorineural hearing loss	PM 21293372
	1 246051459 246051864	na	C	Deletion	SMYD3	Non syndromic sensorineural hearing loss	PM 21293372
	1 246095365 246101323	na	na	Cn gain	SMYD3	Non syndromic sensorineural hearing loss	PM 19587683
	1 246118101 246124261	na	C	Deletion	SMYD3	Non syndromic sensorineural hearing loss	PM 21293372
	1 246274431 246274759	na	T	Deletion	SMYD3	Non syndromic sensorineural hearing loss	PM 21293372
	1 246404334 246667943	na	T	Deletion	SMYD3	Bipolar disorder	PM 19114987
	1 246585973 246586155	na	C	Deletion	SMYD3	Non syndromic sensorineural hearing loss	PM 19036926
	1 246740695 246749190	na	T	Deletion	CNST	Non syndromic sensorineural hearing loss	PM 21293372
	1 246750011 246764002	na	na	Gain	CNST	early passage human iPS cells	PM 21368824
	1 246916484 246916761	na	A	Deletion	SCCPDH	Non syndromic sensorineural hearing loss	PM 21293372
	1 246932775 246933038	na	T	Deletion	SCCPDH	Non syndromic sensorineural hearing loss	PM 21293372
	1 246933507 246933989	na	T	Deletion	KIF28P	Non syndromic sensorineural hearing loss	PM 21293372
	1 246933810 246942714	na	C	Deletion	KIF28P	Non syndromic sensorineural hearing loss	PM 21293372
	1 247056222 247059976	na	A	Deletion	AHCTF1	Non syndromic sensorineural hearing loss	PM 21293372
	1 247075360 247075440	na	na	Insertion	AHCTF1	Non syndromic sensorineural hearing loss	PM 22037309
	1 247142348 247142448	na	na	Insertion	ZNF695	Non syndromic sensorineural hearing loss	PM 22037309
	1 247243440 247243540	na	na	Insertion	ZNF670 ZNF695	Non syndromic sensorineural hearing loss	PM 22037309
	2 254854 255004	na	na	Insertion	SH3YL1	Non syndromic sensorineural hearing loss	PM 22037309
	2 283398 283498	na	na	Insertion	FAM150B	Non syndromic sensorineural hearing loss	PM 22037309
	2 661353 661830	na	C	Deletion	TMEM18	Non syndromic sensorineural hearing loss	PM 21293372
	2 673826 673907	na	na	Insertion	TMEM18	Non syndromic sensorineural hearing loss	PM 22037309
	2 781117 812995	na	na	Insertion or deletion	LINC01115	Non syndromic sensorineural hearing loss	PM 18451855
	2 788028 801725	na	na	Insertion or deletion	LINC01115	Non syndromic sensorineural hearing loss	PM 18451855
	2 796586 806150	na	na	Insertion or deletion	LINC01115	Non syndromic sensorineural hearing loss	PM 18451855
	2 851187 851287	na	na	Insertion	LINC01115	Non syndromic sensorineural hearing loss	PM 22037309
	2 1065032 1065095	na	na	Insertion	SNTG2	Non syndromic sensorineural hearing loss	PM 22037309
	2 1079571 1079775	na	C	Deletion	SNTG2	Non syndromic sensorineural hearing loss	PM 21293372
	2 1101928 1103803	na	na	Copy number	SNTG2	Autism	PM 22495311
	2 1187715 1211081	na	na	Insertion or deletion	SNTG2	Non syndromic sensorineural hearing loss	PM 18451855
	2 1193951 1194004	na	A	Deletion	SNTG2	Non syndromic sensorineural hearing loss	PM 21293372
	2 1336993 1337206	na	T	Deletion	SNTG2	Non syndromic sensorineural hearing loss	PM 21293372
	2 1353624 1355078	na	T	Deletion	SNTG2	Non syndromic sensorineural hearing loss	PM 21293372
	2 1415420 1415528	na	T	Deletion	LOC101927426	Non syndromic sensorineural hearing loss	PM 21293372
	2 1417954 1418043	na	na	Insertion	LOC101927426	Non syndromic sensorineural hearing loss	PM 22037309
	2 1428655 1428722	na	T	Deletion	TPO	Non syndromic sensorineural hearing loss	PM 21293372
	2 1461508 1461645	na	T	Deletion	TPO	Non syndromic sensorineural hearing loss	PM 21293372
	2 1483242 1488714	na	na	Copy number	TPO	Autism	PM 22495311
	2 1493931 1494250	na	G	Deletion	TPO	Non syndromic sensorineural hearing loss	PM 21293372
	2 1493977 1494296	na	A	Deletion	TPO	Non syndromic sensorineural hearing loss	PM 21293372
	2 1500332 1500476	na	G	Deletion	TPO	Non syndromic sensorineural hearing loss	PM 21293372
	2 1507866 1518587	na	C	Deletion	TPO	Non syndromic sensorineural hearing loss	PM 21293372
	2 1512398 1517056	na	G	Deletion	TPO	Non syndromic sensorineural hearing loss	PM 21293372
	2 1640522 1640669	na	T	Deletion	PXDN	Non syndromic sensorineural hearing loss	PM 21293372
	2 1663895 1665316	na	na	Copy number	PXDN	Autism	PM 22495311
	2 1663928 1664028	na	na	Insertion	PXDN	Non syndromic sensorineural hearing loss	PM 22037309
	2 1685747 1686153	na	G	Deletion	PXDN	Non syndromic sensorineural hearing loss	PM 21293372
	2 1714070 1714124	na	G	Deletion	PXDN	Non syndromic sensorineural hearing loss	PM 21293372
	2 1739613 1739999	na	T	Deletion	PXDN	Non syndromic sensorineural hearing loss	PM 21293372
	2 1749559 1749659	na	na	Insertion	PXDN	Non syndromic sensorineural hearing loss	PM 22037309
	2 1792886 2335045	na	na	Copy number	MYT1L	Attention deficit hyperactivity disorder|Chronic motor tic disorder|Schizophrenia|Schizophrenia	PM 22214315|21923761|21956041|22214315
	2 1792885 2335045	na	T	Deletion	MYT1L	Attention deficit hyperactivity disorder|Chronic motor tic disorder|Schizophrenia|Schizophrenia	PM 22214315|21923761|21956041|22214315
	2 1792886 2335045	na	na	Duplication or delet ion	MYT1L	Attention deficit hyperactivity disorder|Chronic motor tic disorder|Schizophrenia|Schizophrenia	PM 22214315|21923761|21956041|22214315
	2 1805544 1805602	na	T	Deletion	MYT1L	Non syndromic sensorineural hearing loss	PM 21293372
	2 1810670 1810770	na	na	Insertion	MYT1L	Non syndromic sensorineural hearing loss	PM 22037309
	2 1812051 1812603	na	C	Deletion	MYT1L	Non syndromic sensorineural hearing loss	PM 21293372
	2 1866728 2035145	na	na	Loss	MYT1L	Non syndromic sensorineural hearing loss	PM 17122850
	2 1990521 2023118	na	na	Insertion or deletion	MYT1L	Non syndromic sensorineural hearing loss	PM 18451855
	2 1994269 2003300	na	na	Copy number	MYT1L	Autism	PM 22495311
	2 2157334 2158470	na	A	Deletion	MYT1L	Non syndromic sensorineural hearing loss	PM 21293372
	2 2977632 2977732	na	na	Insertion	LINC01250	Non syndromic sensorineural hearing loss	PM 22037309
	2 2994790 2994854	na	na	Insertion	LINC01250	Non syndromic sensorineural hearing loss	PM 22037309
	2 3055408 3055497	na	na	Insertion	LINC01250	Non syndromic sensorineural hearing loss	PM 22037309
	2 3122083 3122183	na	na	Insertion	LINC01250	Non syndromic sensorineural hearing loss	PM 22037309
	2 3194166 3214801	na	na	Insertion or deletion	TSSC1	Non syndromic sensorineural hearing loss	PM 18451855
	2 3302227 3302327	na	na	Insertion	TSSC1	Non syndromic sensorineural hearing loss	PM 22037309
	2 3311303 3312564	na	A	Deletion	TSSC1	Non syndromic sensorineural hearing loss	PM 21293372
	2 3449155 3449219	na	na	Insertion	TRAPPC12	Non syndromic sensorineural hearing loss	PM 22037309
	2 3600727 3606384	na	na	Duplication	RNASEH1	Amyotrophic lateral sclerosis	PM 20685689
	2 3704605 3720541	na	na	Insertion or deletion	ALLC	Non syndromic sensorineural hearing loss	PM 18451855
	2 3704928 3717843	na	na	Insertion or deletion	ALLC	Non syndromic sensorineural hearing loss	PM 18451855
	2 3710676 3715892	na	A	Deletion	ALLC	Non syndromic sensorineural hearing loss	PM 21293372
	2 3710679 3715904	na	A	Deletion	ALLC	Non syndromic sensorineural hearing loss	PM 21293372
	2 3710704 3715673	na	C	Deletion	ALLC	Non syndromic sensorineural hearing loss	PM 21293372
	2 3718253 3718414	na	na	Insertion	ALLC	Non syndromic sensorineural hearing loss	PM 22037309
	2 3799664 3799744	na	na	Insertion	DCDC2C	Non syndromic sensorineural hearing loss	PM 22037309
	2 3803434 3803558	na	A	Deletion	DCDC2C	Non syndromic sensorineural hearing loss	PM 21293372
	2 3817989 3818089	na	na	Insertion	DCDC2C	Non syndromic sensorineural hearing loss	PM 22037309
	2 3826070 3826327	na	T	Deletion	DCDC2C	Non syndromic sensorineural hearing loss	PM 21293372
	2 3863087 3863205	na	T	Deletion	DCDC2C	Non syndromic sensorineural hearing loss	PM 21293372
	2 3863090 3863208	na	T	Deletion	DCDC2C	Non syndromic sensorineural hearing loss	PM 21293372
	2 3870824 3870924	na	na	Insertion	DCDC2C	Non syndromic sensorineural hearing loss	PM 22037309
	2 7050695 7050768	na	na	Insertion	RNF144A AS1	Non syndromic sensorineural hearing loss	PM 22037309
	2 7087875 7087975	na	na	Insertion	RNF144A	Non syndromic sensorineural hearing loss	PM 22037309
	2 7196330 7196430	na	na	Insertion	RNF144A	Non syndromic sensorineural hearing loss	PM 22037309
	2 7562336 7562455	na	na	Insertion	LOC100506274	Non syndromic sensorineural hearing loss	PM 22037309
	2 7577646 7577838	na	G	Deletion	LOC100506274	Non syndromic sensorineural hearing loss	PM 21293372
	2 8085903 8085968	na	A	Deletion	LINC00298	Non syndromic sensorineural hearing loss	PM 21293372
	2 8262744 8262814	na	na	Insertion	LINC00299	Non syndromic sensorineural hearing loss	PM 22037309
	2 8707770 8707870	na	na	Insertion	LOC101929567	Non syndromic sensorineural hearing loss	PM 22037309
	2 8723321 8723405	na	na	Insertion	LOC101929567	Non syndromic sensorineural hearing loss	PM 22037309
	2 8822622 8822692	na	na	Insertion	ID2	Non syndromic sensorineural hearing loss	PM 22037309
	2 8913976 8914076	na	na	Insertion	KIDINS220	Non syndromic sensorineural hearing loss	PM 22037309
	2 9082739 9116202	na	na	Gain	MBOAT2	early passage human iPS cells	PM 21368824
	2 9432892 9466278	na	na	Insertion or deletion	ASAP2	Non syndromic sensorineural hearing loss	PM 18451855
	2 9499544 9544262	na	na	Insertion or deletion	ASAP2	Non syndromic sensorineural hearing loss	PM 18451855
	2 9545014 9545114	na	na	Insertion	ASAP2	Non syndromic sensorineural hearing loss	PM 22037309
	2 9683596 9683676	na	na	Insertion	ADAM17	Non syndromic sensorineural hearing loss	PM 22037309
	2 10052137 10052205	na	na	Insertion	TAF1B	Non syndromic sensorineural hearing loss	PM 22037309
	2 10308365 10308465	na	na	Insertion	C2orf48	Non syndromic sensorineural hearing loss	PM 22037309
	2 10472127 10494218	na	na	Insertion or deletion	HPCAL1	Non syndromic sensorineural hearing loss	PM 18451855
	2 10528100 10528200	na	na	Insertion	HPCAL1	Non syndromic sensorineural hearing loss	PM 22037309
	2 10708917 10708971	na	na	Insertion	NOL10	Non syndromic sensorineural hearing loss	PM 22037309
	2 10711840 10711922	na	na	Insertion	NOL10	Non syndromic sensorineural hearing loss	PM 22037309
	2 11331939 11360530	na	na	Insertion or deletion	ROCK2	Non syndromic sensorineural hearing loss	PM 18451855
	2 11346231 11346309	na	A	Deletion	ROCK2	Non syndromic sensorineural hearing loss	PM 21293372
	2 11369759 11369859	na	na	Insertion	ROCK2	Non syndromic sensorineural hearing loss	PM 22037309
	2 11392203 11392548	na	T	Deletion	ROCK2	Non syndromic sensorineural hearing loss	PM 21293372
	2 11438024 11438292	na	A	Deletion	ROCK2	Non syndromic sensorineural hearing loss	PM 21293372
	2 11438028 11438306	na	A	Deletion	ROCK2	Non syndromic sensorineural hearing loss	PM 21293372
	2 11712589 11741036	na	na	Gain	GREB1	Autism	PM 20531469
	2 11717864 11717917	na	na	Insertion	GREB1	Non syndromic sensorineural hearing loss	PM 22037309
	2 11845172 11845271	na	na	Insertion	LPIN1	Non syndromic sensorineural hearing loss	PM 22037309
	2 11861294 11870017	na	na	Insertion or deletion	LPIN1	Non syndromic sensorineural hearing loss	PM 18451855
	2 11915677 11915777	na	na	Insertion	LPIN1	Non syndromic sensorineural hearing loss	PM 22037309
	2 11928361 11960960	na	na	Insertion or deletion	LPIN1	Non syndromic sensorineural hearing loss	PM 18451855
	2 11936890 11942059	na	na	High copy gain	LPIN1	Non syndromic sensorineural hearing loss	PM 19587683
	2 12344011 12344089	na	A	Deletion	MIR3681	Non syndromic sensorineural hearing loss	PM 21293372
	2 12375523 12405112	na	na	Insertion or deletion	MIR3681	Non syndromic sensorineural hearing loss	PM 18451855
	2 12389143 12389243	na	na	Insertion	MIR3681	Non syndromic sensorineural hearing loss	PM 22037309
	2 12460270 12460370	na	na	Insertion	MIR3681	Non syndromic sensorineural hearing loss	PM 22037309
	2 12711596 12712065	na	T	Deletion	TRIB2	Non syndromic sensorineural hearing loss	PM 21293372
	2 12729660 12729733	na	na	Insertion	TRIB2	Non syndromic sensorineural hearing loss	PM 22037309
	2 12773136 12776822	na	na	Copy number	TRIB2	Autism	PM 22495311
	2 12781151 12781251	na	na	Insertion	TRIB2	Non syndromic sensorineural hearing loss	PM 22037309
	2 14422304 14422431	na	C	Deletion	LINC00276	Non syndromic sensorineural hearing loss	PM 21293372
	2 14448742 14449062	na	G	Deletion	LINC00276	Non syndromic sensorineural hearing loss	PM 21293372
	2 15430779 15430879	na	na	Insertion	NBAS	Non syndromic sensorineural hearing loss	PM 22037309
	2 15437342 15438247	na	na	Cn gain	NBAS	Non syndromic sensorineural hearing loss	PM 19587683
	2 15736572 15736783	na	G	Deletion	DDX1	Non syndromic sensorineural hearing loss	PM 21293372
	2 15744816 15744916	na	na	Insertion	DDX1	Non syndromic sensorineural hearing loss	PM 22037309
	2 16074650 16074727	na	na	Insertion	MYCNOS	Non syndromic sensorineural hearing loss	PM 22037309
	2 16601946 16602046	na	na	Insertion	LOC101928129	Non syndromic sensorineural hearing loss	PM 22037309
	2 16750821 16785026	na	na	Insertion or deletion	FAM49A	Non syndromic sensorineural hearing loss	PM 18451855
	2 16810980 16811080	na	na	Insertion	FAM49A	Non syndromic sensorineural hearing loss	PM 22037309
	2 17851060 17851159	na	na	Insertion	SMC6	Non syndromic sensorineural hearing loss	PM 22037309
	2 17999220 17999310	na	na	Insertion	MSGN1	Non syndromic sensorineural hearing loss	PM 22037309
	2 18577352 18577452	na	na	Insertion	RDH14	Non syndromic sensorineural hearing loss	PM 22037309
	2 18591294 18591384	na	na	Insertion	RDH14	Non syndromic sensorineural hearing loss	PM 22037309
	2 18630805 18665802	na	na	Insertion or deletion	RDH14	Non syndromic sensorineural hearing loss	PM 18451855
	2 18648243 18649902	na	C	Deletion	RDH14	Non syndromic sensorineural hearing loss	PM 21293372
	2 18659081 18659169	na	na	Insertion	RDH14	Non syndromic sensorineural hearing loss	PM 22037309
	2 18769627 18770829	na	A	Deletion	NT5C1B RDH14	Non syndromic sensorineural hearing loss	PM 21293372
	2 19140292 19140392	na	na	Insertion	LINC01376	Non syndromic sensorineural hearing loss	PM 22037309
	2 19153674 19153774	na	na	Insertion	LINC01376	Non syndromic sensorineural hearing loss	PM 22037309
	2 20007565 20007665	na	na	Insertion	CISD1P1	Non syndromic sensorineural hearing loss	PM 22037309
	2 20017933 20018011	na	na	Insertion	CISD1P1	Non syndromic sensorineural hearing loss	PM 22037309
	2 20086406 20086450	na	na	Insertion	LINC00954	Non syndromic sensorineural hearing loss	PM 22037309
	2 20402255 20402335	na	na	Insertion	SDC1	Non syndromic sensorineural hearing loss	PM 22037309
	2 20425771 20425837	na	na	Insertion	SDC1	Non syndromic sensorineural hearing loss	PM 22037309
	2 20525306 20525406	na	na	Insertion	PUM2	Non syndromic sensorineural hearing loss	PM 22037309
	2 20530146 20530453	na	C	Deletion	PUM2	Non syndromic sensorineural hearing loss	PM 21293372
	2 20595045 20595165	na	C	Deletion	SLC7A15P	Non syndromic sensorineural hearing loss	PM 21293372
	2 20649360 20649424	na	na	Insertion	RHOB	Non syndromic sensorineural hearing loss	PM 22037309
	2 20907111 20907195	na	na	Insertion	C2orf43	Non syndromic sensorineural hearing loss	PM 22037309
	2 20976649 20976736	na	C	Deletion	C2orf43	Non syndromic sensorineural hearing loss	PM 21293372
	2 21060343 21060443	na	na	Insertion	LOC101928271	Non syndromic sensorineural hearing loss	PM 22037309
	2 23263842 23308821	na	na	Insertion or deletion	LOC101929251	Non syndromic sensorineural hearing loss	PM 18451855
	2 23271937 23297984	na	na	Insertion or deletion	LOC101929251	Non syndromic sensorineural hearing loss	PM 18451855
	2 23563069 23563154	na	na	Insertion	KLHL29	Non syndromic sensorineural hearing loss	PM 22037309
	2 23603257 23603357	na	na	Insertion	KLHL29	Non syndromic sensorineural hearing loss	PM 22037309
	2 23626535 23626595	na	na	Insertion	KLHL29	Non syndromic sensorineural hearing loss	PM 22037309
	2 23746388 23778719	na	na	Insertion or deletion	KLHL29	Non syndromic sensorineural hearing loss	PM 18451855
	2 23884820 23899075	na	na	Insertion or deletion	KLHL29	Non syndromic sensorineural hearing loss	PM 18451855
	2 23990599 23990698	na	na	Insertion	ATAD2B	Non syndromic sensorineural hearing loss	PM 22037309
	2 24247503 24247568	na	na	Insertion	MFSD2B	Non syndromic sensorineural hearing loss	PM 22037309
	2 24454964 24465219	na	na	Loss	ITSN2	early passage human iPS cells	PM 21368824
	2 24491789 24527924	na	na	Insertion or deletion	ITSN2	Non syndromic sensorineural hearing loss	PM 18451855
	2 24848368 24882742	na	na	Insertion or deletion	NCOA1	Non syndromic sensorineural hearing loss	PM 18451855
	2 24906042 24906659	na	C	Deletion	NCOA1	Non syndromic sensorineural hearing loss	PM 21293372
	2 24976054 24976154	na	na	Insertion	NCOA1	Non syndromic sensorineural hearing loss	PM 22037309
	2 25067613 25067708	na	na	Insertion	ADCY3	Non syndromic sensorineural hearing loss	PM 22037309
	2 25081124 25081439	na	A	Deletion	ADCY3	Non syndromic sensorineural hearing loss	PM 21293372
	2 25201193 25225839	na	na	Insertion or deletion	DNAJC27 AS1	Non syndromic sensorineural hearing loss	PM 18451855
[truncated: 19,670 more rows]
